# Supplementary material for: Dynamic reversal of random X-Chromosome inactivation during iPSC reprogramming
Source: HighWire-hosted journal article supplement (doi:10.1101/gr.249706.119), 2019-09-12
Supplement: Supplemental_Table_S3.xlsx [file Supplemental_Table_S3.xlsx]

## Sheet: CountMatrix
																		Allelic ratio (Mus/Mus+Cast)							Allelic ratio (log2(Mus/Cast))
Chromosome	Gene	Day_2_129	Day_2_Cast	Day_8_129	Day_8_Cast	Day_10_129	Day_10_Cast	Day_13_129	Day_13_Cast	Day_15_129	Day_15_Cast	iPSCs_129	iPSCs_Cast	ESCs_129	ESCs_Cast	Chromosome	Gene	Day_2	Day_8	Day_10	Day_13	Day_15	iPSCs	ESCs	Day_2	Day_8	Day_10	Day_13	Day_15	iPSCs	ESCs
1	Xkr4					0	41	0	41	0	511			28	19	1	Xkr4			0.0232558	0.0232558	0.00194932		0.591837			-5.39232	-5.39232	-9		0.536053
1	Sox17									328	409					1	Sox17					0.445196							-0.317536
1	Mrpl15	920	712	943	1893	2096	2268	2050	1790	5188	3029	2253	1103	2553	2486	1	Mrpl15	0.563647	0.332629	0.480302	0.533837	0.631342	0.671233	0.506646	0.369299	-1.00458	-0.11373	0.195562	0.776139	1.02975	0.038352
1	Lypla1	589	420	943	110	753	991	832	618	2060	1105	788	301	638	384	1	Lypla1	0.583581	0.894787	0.431844	0.573691	0.650774	0.72319	0.624023	0.486895	3.08823	-0.395776	0.428377	0.897993	1.38548	0.730957
1	Tcea1	1021	911	1093	1085	860	704	732	657	3572	1789	1742	773	1893	1228	1	Tcea1	0.528438	0.501835	0.549808	0.526959	0.666232	0.692491	0.606468	0.164289	0.0105886	0.28839	0.155726	0.997176	1.17117	0.623951
1	Rgs20					7	40									1	Rgs20			0.163265							-2.35755
1	Atp6v1h	110	129	46	93	147	193	63	123	422	487	137	72	384	295	1	Atp6v1h	0.460581	0.333333	0.432749	0.340426	0.464325	0.654028	0.565345	-0.227952	-1	-0.390459	-0.954196	-0.206223	0.9187	0.379261
1	Rb1cc1							6	47	17	78			40	227	1	Rb1cc1				0.127273	0.185567		0.152416				-2.77761	-2.13386		-2.47534
1	4732440D04Rik	77	271	66	12	17	39	79	119	28	15					1	4732440D04Rik	0.222857	0.8375	0.310345	0.4	0.644444			-1.80206	2.36565	-1.152	-0.584963	0.857981
1	Pcmtd1	390	349	944	1780	1221	839	376	682	1443	1473	135	55	561	576	1	Pcmtd1	0.527665	0.346662	0.592629	0.35566	0.494859	0.708333	0.493415	0.159814	-0.914301	0.540783	-0.857321	-0.0296658	1.28011	-0.0380012
1	Sntg1	335	3	94	0	745	263	503	191	689	152	298	47	496	134	1	Sntg1	0.988235	0.989583	0.738614	0.724138	0.818505	0.861671	0.786392	6.39232	6.56986	1.49864	1.39232	2.17306	2.63904	1.88029
1	Rrs1	1283	2201	1316	1714	1900	1982	1395	1089	4797	2319	1933	789	1687	1612	1	Rrs1	0.36833	0.434367	0.489444	0.561545	0.674066	0.709985	0.51136	-0.778169	-0.380953	-0.0609261	0.356971	1.04831	1.29166	0.0655685
1	Mybl1	45	33			17	27	3	49	18	140			7	48	1	Mybl1	0.575		0.391304	0.0740741	0.11875		0.140351	0.436099		-0.63743	-3.64386	-2.89162		-2.61471
1	Vcpip1									35	55	26	28	31	59	1	Vcpip1					0.391304	0.482143	0.347826					-0.63743	-0.103093	-0.906891
1	Sgk3	55	164	923	1693	1181	504	421	378	761	221	243	62	293	138	1	Sgk3	0.253394	0.352941	0.700652	0.526841	0.77439	0.794788	0.678984	-1.55897	-0.874469	1.22687	0.155045	1.77923	1.95346	1.08073
1	Mcmdc2							42	0	287	206	157	170	80	59	1	Mcmdc2				0.977273	0.581818	0.480243	0.574468				5.42626	0.476438	-0.114072	0.432959
1	Ppp1r42									26	174					1	Ppp1r42					0.133663							-2.69632
1	Cops5	624	535	985	769	862	950	744	465	1355	1062	463	293	434	670	1	Cops5	0.538329	0.561503	0.475744	0.615194	0.560562	0.612137	0.393309	0.221623	0.356729	-0.140085	0.67691	0.351216	0.658309	-0.625297
1	Cspp1	59	127	0	74	118	74	94	78	169	203	58	44	112	169	1	Cspp1	0.319149	0.0131579	0.613402	0.545977	0.454545	0.567308	0.399293	-1.09311	-6.22882	0.665999	0.266075	-0.263034	0.39079	-0.589212
1	Arfgef1	130	337	2	637	480	298	109	176	43	403			63	121	1	Arfgef1	0.279318	0.00468019	0.616667	0.383275	0.0982143		0.344086	-1.36746	-7.73245	0.685891	-0.686246	-3.19878		-0.930737
1	Cpa6	6	193													1	Cpa6	0.0348259							-4.79256
1	Prex2					232	0			248	258			34	141	1	Prex2			0.995726		0.490157		0.19774			7.86419		-0.0568064		-2.02046
1	A830018L16Rik							0	42	0	50			311	335	1	A830018L16Rik				0.0227273	0.0192308		0.481481				-5.42626	-5.67243		-0.106915
1	Sulf1	1860	1589	928	536	667	755	761	934	2592	4558	279	486	1201	934	1	Sulf1	0.539264	0.633697	0.469101	0.449028	0.362556	0.365059	0.562471	0.227051	0.790757	-0.178538	-0.295175	-0.814095	-0.798495	0.362399
1	Slco5a1					84	89			48	300	43	0			1	Slco5a1			0.485714		0.14	0.977778				-0.0824622		-2.61891	5.45943
1	Prdm14					117	871	267	962	539	1736	304	672	384	1162	1	Prdm14			0.119192	0.217709	0.237154	0.311861	0.248708			-2.88554	-1.8453	-1.68557	-1.1418	-1.59492
1	Ncoa2	26	32	365	219	346	518	354	241	864	482	91	63	269	61	1	Ncoa2	0.45	0.624573	0.400693	0.59464	0.641691	0.589744	0.813253	-0.289507	0.73434	-0.580799	0.552812	0.840677	0.523562	2.12262
1	Tram1	2828	2486	1056	1095	1206	973	854	816	2052	2440	606	223	664	542	1	Tram1	0.532167	0.490943	0.553416	0.511364	0.456831	0.730445	0.550497	0.185886	-0.0522724	0.309432	0.0655883	-0.249739	1.4382	0.292402
1	Lactb2	721	1227	466	426	1770	2172	1573	1631	4973	4104	2686	1665	2913	2661	1	Lactb2	0.370256	0.522371	0.449037	0.490954	0.547858	0.617275	0.522597	-0.76624	0.129186	-0.295124	-0.0522055	0.277024	0.689608	0.13049
1	Xkr9									29	151					1	Xkr9					0.164835							-2.34104
1	Eya1									27	972					1	Eya1					0.027972							-5.11894
1	Msc	0	68	0	225					349	146	181	44	69	238	1	Msc	0.0142857	0.00440529			0.704225	0.801762	0.226537	-6.10852	-7.82018			1.25154	2.01594	-1.77158
1	Terf1	176	778	375	1932	672	3343	552	1792	1120	2907	587	1345	2453	3239	1	Terf1	0.185146	0.162841	0.167538	0.23572	0.278233	0.304033	0.43098	-2.13787	-2.36204	-2.3129	-1.69702	-1.37524	-1.19479	-0.400859
1	Sbspon			49	49	46	9			0	46					1	Sbspon		0.5	0.824561		0.0208333				0	2.23266		-5.55459
1	Rpl7	4630	3565	4929	5840	5505	5238	4618	3220	5602	5595	4573	1492	4606	2966	1	Rpl7	0.564963	0.457711	0.512424	0.589158	0.500313	0.753915	0.608265	0.377017	-0.244628	0.0717131	0.520072	0.00180353	1.61524	0.634823
1	Rdh10	89	139			60	81	10	82	89	549	9	36	0	66	1	Rdh10	0.391304		0.426573	0.117021	0.140625	0.212766	0.0147059	-0.63743		-0.426815	-2.91561	-2.61143	-1.88753	-6.06609
1	Stau2	118	268			71	18	28	24	44	153	15	26	26	90	1	Stau2	0.306701		0.791209	0.537037	0.226131	0.372093	0.228814	-1.17664		1.922	0.214125	-1.77493	-0.754888	-1.75291
1	Ube2w	257	256	416	349	307	367	131	169	284	210	96	54	99	146	1	Ube2w	0.500971	0.543677	0.455621	0.437086	0.574597	0.638158	0.404858	0.00560271	0.252692	-0.256775	-0.364997	0.433719	0.818553	-0.555816
1	Eloc	67	1821	238	1467	41	975	22	897	141	2381	13	812	964	773	1	Eloc	0.0359788	0.140012	0.0412574	0.0249729	0.0562599	0.0169287	0.554917	-4.74384	-2.61877	-4.53842	-5.28701	-4.06821	-5.85976	0.318195
1	Tmem70	2001	3001	1471	3750	2776	2800	1044	1095	1564	976	457	275	688	577	1	Tmem70	0.40008	0.28183	0.497849	0.48809	0.615657	0.623978	0.543804	-0.584482	-1.3495	-0.0124148	-0.0687449	0.679732	0.730679	0.253434
1	Ly96	77	221	0	268					0	46					1	Ly96	0.26	0.0037037			0.0208333			-1.50901	-8.07146			-5.55459
1	Jph1	7	61			0	80	0	245	25	365			8	87	1	Jph1	0.114286		0.0121951	0.00404858	0.0663265		0.0927835	-2.9542		-6.33985	-7.94251	-3.81526		-3.28951
1	Rbm6-ps1															1	Rbm6-ps1
1	Pi15	112	363													1	Pi15	0.236897							-1.68762
1	Mcm3	1975	1885	2811	1943	6779	6518	4849	5667	14179	8599	6563	3211	6355	6199	1	Mcm3	0.511652	0.591253	0.509813	0.461114	0.622476	0.67144	0.506212	0.0672533	0.532568	0.0566346	-0.224855	0.721449	1.0311	0.0358509
1	Paqr8	142	176	0	1476	128	325	57	171							1	Paqr8	0.446875	0.00067659	0.283516	0.252174				-0.307734	-10.5285	-1.3375	-1.56828
1	Efhc1							17	101	0	166					1	Efhc1				0.15	0.00595238						-2.5025	-7.3837
1	Tram2	602	1315	0	54	101	385	275	348	610	1251	128	118	134	63	1	Tram2	0.314226	0.0178571	0.209016	0.4416	0.327966	0.520161	0.678392	-1.12593	-5.78136	-1.92003	-0.338559	-1.03499	0.116409	1.07682
1	Tmem14a	31	57	337	252	143	40					58	14			1	Tmem14a	0.355556	0.571912	0.778378			0.797297		-0.857981	0.417886	1.81237			1.97575
1	Gsta3					243	153	113	27	999	1202	550	715	661	728	1	Gsta3			0.613065	0.802817	0.453926	0.434886	0.475917			0.663951	2.02554	-0.266637	-0.377907	-0.139088
1	Khdc1a									0	72					1	Khdc1a					0.0135135							-6.18982
1	Kcnq5	5	323	3	338	81	825	0	313	0	274	0	79	0	149	1	Kcnq5	0.0181818	0.0116618	0.0903084	0.0031746	0.00362319	0.0123457	0.00662252	-5.75489	-6.40514	-3.33245	-8.29462	-8.10329	-6.32193	-7.22882
1	Rims1			0	302					251	54	123	52			1	Rims1		0.00328947			0.820847	0.700565			-8.24317			2.19592	1.22628
1	Ogfrl1	0	46	62	5					61	124			0	43	1	Ogfrl1	0.0208333	0.913043			0.331551		0.0222222	-5.55459	3.39232			-1.01159		-5.45943
1	Smap1	98	246	122	69	59	68	35	262	136	262	40	40	43	59	1	Smap1	0.286127	0.637306	0.465116	0.120401	0.3425	0.5	0.423077	-1.31901	0.813231	-0.201634	-2.86899	-0.940887	0	-0.447459
1	Sdhaf4	471	1033	746	666	429	1036	312	818	717	1132	156	483	284	442	1	Sdhaf4	0.313413	0.528289	0.293115	0.276502	0.387898	0.24493	0.391484	-1.13138	0.163421	-1.27001	-1.3877	-0.658092	-1.62424	-0.636345
1	Fam135a	115	155	0	133	267	412	148	250	323	547			102	87	1	Fam135a	0.426471	0.00740741	0.393539	0.3725	0.37156		0.539267	-0.427421	-7.06609	-0.623909	-0.752375	-0.758182		0.227069
1	Col9a1									290	451					1	Col9a1					0.391655							-0.635304
1	Col19a1									0	181					1	Col19a1					0.00546448							-7.50779
1	Lmbrd1	356	147	412	90	430	548	282	340	586	243	72	64	104	66	1	Lmbrd1	0.706931	0.819444	0.439796	0.453526	0.706378	0.528986	0.610465	1.27033	2.1822	-0.349118	-0.26897	1.26648	0.167457	0.648156
1	Adgrb3													0	44	1	Adgrb3							0.0217391							-5.49185
1	4931408C20Rik			331	773	242	449	44	176	65	184					1	4931408C20Rik		0.300181	0.350649	0.202703	0.262948				-1.22115	-0.888969	-1.97575	-1.48699
1	Ptp4a1	0	117			6	163	7	101	24	103	0	41			1	Ptp4a1	0.00840336		0.0409357	0.0727273	0.193798	0.0232558		-6.88264		-4.5502	-3.67243	-2.05658	-5.39232
1	Prim2	602	822	807	1754	1519	1602	1223	613	2368	1408	1476	567	1241	1404	1	Prim2	0.422861	0.315256	0.486711	0.665941	0.627051	0.722249	0.46921	-0.448734	-1.11904	-0.0767031	0.995293	0.749607	1.37871	-0.177905
1	Rab23	1987	2928	1088	1058	865	1559	910	911	1484	688	505	475	972	1122	1	Rab23	0.404312	0.506983	0.356966	0.499726	0.683073	0.515275	0.464218	-0.55909	0.0403014	-0.849107	-0.00158277	1.10789	0.0881758	-0.206846
1	Bag2	1768	2538	1857	1684	1390	1513	324	582	814	986	26	112	44	159	1	Bag2	0.410631	0.524414	0.47883	0.35793	0.452275	0.192857	0.219512	-0.521326	0.141002	-0.122243	-0.843056	-0.27625	-2.06529	-1.83007
1	Zfp451	68	31	227	126	98	145	91	109	276	728	87	79	471	436	1	Zfp451	0.683168	0.642254	0.404082	0.455446	0.275348	0.52381	0.519252	1.10852	0.844205	-0.560468	-0.257798	-1.39603	0.137504	0.111154
1	Bend6	123	1835					0	131	24	31					1	Bend6	0.0632653			0.0075188	0.438596			-3.88815			-7.04439	-0.356144
1	Dst	24	167	135	1283	34	336	178	548	59	429			180	31	1	Dst	0.129534	0.0957746	0.094086	0.245879	0.122449		0.849765	-2.74846	-3.23897	-3.26732	-1.61685	-2.8413		2.49985
1	A930005N03Rik									82	27					1	A930005N03Rik					0.747748							1.56768
1	Ccdc115	162	241	488	750	291	401	211	219	559	741	238	241	569	358	1	Ccdc115	0.402469	0.394355	0.420749	0.490741	0.430108	0.496881	0.613563	-0.570135	-0.618978	-0.461227	-0.0534393	-0.405992	-0.0179964	0.666978
1	Imp4	1131	2080	1149	2397	2171	2937	1561	2420	3722	4797	1955	1723	5228	4918	1	Imp4	0.352319	0.324126	0.425049	0.392167	0.436921	0.531522	0.515274	-0.878403	-1.0602	-0.43581	-0.632209	-0.365968	0.182147	0.08817
1	Ptpn18	22	124	250	1265	73	405	347	1661	430	2254	40	117	3	973	1	Ptpn18	0.155405	0.165458	0.154167	0.173134	0.160462	0.257862	0.00408998	-2.44222	-2.33452	-2.45588	-2.25576	-2.38737	-1.52509	-7.92778
1	Cfc1					0	72	69	110	272	123					1	Cfc1			0.0135135	0.38674	0.687657					-6.18982	-0.665133	1.13856
1	Arhgef4			0	101	52	152	16	164	166	23					1	Arhgef4		0.00970874	0.257282	0.0934066	0.874346				-6.67243	-1.52947	-3.27886	2.79874
1	Fam168b	1714	1647			323	796	419	370	1922	1428	297	174	75	148	1	Fam168b	0.509961		0.289028	0.530973	0.573687	0.630021	0.337778	0.0574923		-1.29859	0.17897	0.428353	0.767957	-0.971241
1	Plekhb2	314	277			181	166	84	77	79	174					1	Plekhb2	0.531197		0.52149	0.521472	0.313725			0.180267		0.12409	0.123989	-1.12928
1	Hs6st1	50	191	622	3113	760	991	217	346	612	620	193	162	345	297	1	Hs6st1	0.209877	0.166711	0.434113	0.385841	0.496759	0.543417	0.537267	-1.91254	-2.32146	-0.382444	-0.670608	-0.0187062	0.251185	0.21546
1	Uggt1	401	199	54	40	118	87	93	139	415	134	61	22	71	6	1	Uggt1	0.667774	0.572917	0.574879	0.401709	0.754991	0.729412	0.911392	1.0072	0.423808	0.435386	-0.574694	1.62362	1.43063	3.36257
1	Arid5a			336	142			0	104					40	35	1	Arid5a		0.702083		0.00943396			0.532468		1.23673		-6.71425			0.187627
1	Kansl3	702	298	338	216	902	479	717	799	800	819	183	189	157	35	1	Kansl3	0.701597	0.609712	0.652928	0.472991	0.494139	0.491979	0.814433	1.23338	0.64359	0.911692	-0.156016	-0.0338217	-0.0462937	2.13386
1	Lman2l	245	156			298	118	113	172	323	211	95	54	73	146	1	Lman2l	0.610422		0.715311	0.397213	0.604478	0.635762	0.334842	0.647894		1.32918	-0.601738	0.61193	0.803603	-0.990219
1	Cnnm3			282	730	241	188	248	197	580	937	114	72	545	171	1	Cnnm3		0.279093	0.561485	0.557047	0.382488	0.611702	0.760446		-1.36907	0.356621	0.330645	-0.69105	0.655665	1.66649
1	Ankrd23			3	224	107	250	30	79							1	Ankrd23		0.0174672	0.300836	0.279279					-5.81378	-1.21666	-1.36773
1	Ankrd39	138	169	212	1136	54	282	68	110	200	192	79	23	101	175	1	Ankrd39	0.449838	0.157778	0.162722	0.383333	0.510152	0.769231	0.366906	-0.29045	-2.41631	-2.3633	-0.685891	0.0585947	1.73697	-0.787006
1	Sema4c			14	34			16	83	65	50					1	Sema4c		0.3		0.168317	0.564103				-1.22239		-2.30485	0.371969
1	Fam178b			0	202	64	43	310	274	687	815	432	206	291	256	1	Fam178b		0.00490196	0.59633	0.530717	0.457447	0.676562	0.531876		-7.66534	0.562936	0.177483	-0.246161	1.06474	0.1842
1	Actr1b	2618	1771	3383	1679	1575	912	644	645	2104	1285	558	212	769	628	1	Actr1b	0.596447	0.668246	0.633186	0.499613	0.620761	0.724093	0.550393	0.563637	1.01027	0.787581	-0.002235	0.71093	1.39199	0.291798
1	Zap70							104	177	46	75	27	66	44	15	1	Zap70				0.371025	0.382114	0.294737	0.737705				-0.761488	-0.693339	-1.25873	1.49185
1	Tmem131	209	640	0	891	389	753	301	484	692	1153	348	188	520	514	1	Tmem131	0.246769	0.00111982	0.340909	0.383736	0.375203	0.648699	0.502896	-1.60994	-9.8009	-0.95109	-0.683436	-0.735716	0.884841	0.0167109
1	F830112A20Rik															1	F830112A20Rik
1	Vwa3b					0	82	22	359	182	274	57	20	160	90	1	Vwa3b			0.0119048	0.0600522	0.399563	0.734177	0.638889			-6.37504	-3.96829	-0.587588	1.46566	0.823122
1	Coa5	0	2036	0	720	0	1680	0	903	0	2449	0	699	740	371	1	Coa5	0.000490677	0.00138504	0.00059453	0.00110497	0.000407997	0.00142653	0.665768	-10.9922	-9.49386	-10.7151	-9.82018	-11.2586	-9.45121	0.994171
1	Aff3	7	103	0	96	0	45	38	266	499	1401					1	Aff3	0.0714286	0.0102041	0.0212766	0.127451	0.262881			-3.70044	-6.59991	-5.52356	-2.77529	-1.48749
1	Lonrf2													65	79	1	Lonrf2							0.452055							-0.277534
1	Chst10	135	104			91	95			949	493	515	269			1	Chst10	0.564315		0.489362		0.657895	0.656489		0.373217		-0.0614005		0.943416	0.934412
1	Pdcl3	2308	4533	1402	1445	914	1571	676	1064	1683	2234	834	521	1217	1041	1	Pdcl3	0.337425	0.492453	0.367913	0.388634	0.429701	0.615328	0.538938	-0.973516	-0.0435525	-0.780758	-0.653626	-0.408383	0.677726	0.225159
1	Npas2									80	0					1	Npas2					0.987805							6.33985
1	Tbc1d8			19	1143									289	1230	1	Tbc1d8		0.0171821					0.190664		-5.83794					-2.08571
1	Cnot11					60	67	86	30	495	314	295	106	33	58	1	Cnot11			0.472868	0.737288	0.611591	0.734491	0.365591			-0.156726	1.48875	0.654988	1.46799	-0.79518
1	Rnf149	227	202	0	280	81	158	40	58	279	220	198	161	227	127	1	Rnf149	0.529002	0.0035461	0.340249	0.41	0.558882	0.551247	0.640449	0.167554	-8.13443	-0.955331	-0.525091	0.34138	0.296775	0.83289
1	Map4k4	237	589	99	1375	417	1312	153	468	784	1133	169	98	108	64	1	Map4k4	0.28744	0.0677507	0.241479	0.247191	0.409067	0.63197	0.626437	-1.30975	-3.78241	-1.65129	-1.60666	-0.530656	0.780034	0.745817
1	Il1r1	666	1044							8	755					1	Il1r1	0.389603				0.0117647			-0.647744				-6.39232
1	Il1rl2	104	73					0	70							1	Il1rl2	0.586592			0.0138889				0.504792			-6.14975
1	Il1rl1	2232	1855													1	Il1rl1	0.546099							0.266787
1	Il18r1			0	3304	48	764									1	Il18r1		0.00030248	0.0601966						-11.6904	-3.96461
1	Il18rap	164	194	84	164											1	Il18rap	0.458333	0.34						-0.241008	-0.956931
1	Slc9a2									0	207					1	Slc9a2					0.00478469							-7.70044
1	Mfsd9	116	114			216	448	140	162							1	Mfsd9	0.50431		0.325826	0.463816				0.0248747		-1.04902	-0.209177
1	Mrps9	970	1102	1515	2298	1450	2189	643	1283	2220	1735	968	538	1330	1392	1	Mrps9	0.468177	0.397379	0.398517	0.334025	0.561284	0.642573	0.48862	-0.18389	-0.600737	-0.593883	-0.995513	0.355442	0.846211	-0.0656847
1	Gpr45									60	97					1	Gpr45					0.383648							-0.683973
1	Tgfbrap1	172	118	0	59	483	562	83	152	679	206	39	8	159	92	1	Tgfbrap1	0.592466	0.0163934	0.462273	0.35443	0.766629	0.816327	0.632411	0.53981	-5.90689	-0.218128	-0.86507	1.7159	2.152	0.782769
1	AI597479	126	219	0	1582	396	611	260	166	510	158	203	114	257	186	1	AI597479	0.365994	0.000631313	0.393459	0.609813	0.762687	0.639498	0.579775	-0.792675	-10.6284	-0.624393	0.644202	1.6843	0.826935	0.464333
1	Fhl2	2439	2799	2019	1089	943	1375	609	655	1110	1147	108	69	297	228	1	Fhl2	0.465649	0.649518	0.406897	0.481833	0.491811	0.608939	0.565465	-0.198546	0.890027	-0.543622	-0.104887	-0.0472638	0.638901	0.379965
1	Nck2			3	171	39	304	72	289	223	502	19	41	42	99	1	Nck2		0.0227273	0.115942	0.201102	0.308116	0.322581	0.300699		-5.42626	-2.93074	-1.99008	-1.16706	-1.07039	-1.21759
1	Uxs1	867	626	529	342	579	367	223	261	1362	507	340	86	242	368	1	Uxs1	0.580602	0.607102	0.611814	0.460905	0.728487	0.796729	0.397059	0.46923	0.627784	0.656347	-0.226068	1.42389	1.97068	-0.602665
1	Tpp2	376	367	359	99	673	650	447	438	619	793	321	151	325	280	1	Tpp2	0.50604	0.782609	0.508679	0.505073	0.438472	0.679325	0.537068	0.0348588	1.848	0.050091	0.0292778	-0.356871	1.08299	0.214302
1	Tex30	154	134	80	289	172	116	102	83	322	119	178	44	102	85	1	Tex30	0.534483	0.218329	0.596552	0.550802	0.72912	0.799107	0.544974	0.199309	-1.84006	0.564264	0.294183	1.4285	1.99196	0.260236
1	Kdelc1	1431	1514	2342	1180	382	407	431	331	810	1373	168	161	439	129	1	Kdelc1	0.485918	0.664869	0.484197	0.565445	0.371167	0.510574	0.77193	-0.0812863	0.988348	-0.0912248	0.379848	-0.760608	0.0610294	1.75899
1	Bivm	131	83			505	237	339	324	905	596	291	125	330	178	1	Bivm	0.611111		0.680108	0.511278	0.602794	0.698565	0.64902	0.652077		1.08818	0.065095	0.60178	1.21254	0.886872
1	Ercc5	289	282	391	2364	254	1461	266	507	225	1569	118	193	424	356	1	Ercc5	0.506108	0.142184	0.148515	0.344516	0.125835	0.380192	0.543478	0.0352508	-2.59291	-2.51937	-0.927989	-2.79637	-0.705095	0.251539
1	Gulp1	177	85	160	62			57	61	92	277					1	Gulp1	0.674242	0.71875		0.483333	0.250674			1.04947	1.35364		-0.0962153	-1.57978
1	Col5a2	19613	17364	608	884	138	205	180	233	1405	1396					1	Col5a2	0.530409	0.407631	0.402899	0.436145	0.501605			0.175701	-0.539235	-0.567559	-0.370519	0.00926457
1	Wdr75	1871	2030	3131	2838	2387	1898	2115	1671	4991	2393	2255	909	3607	2796	1	Wdr75	0.479631	0.524535	0.557033	0.558606	0.675873	0.712571	0.56331	-0.11761	0.141701	0.330563	0.339765	1.06019	1.30983	0.367319
1	Slc40a1			894	0	579	214	629	273	94	15			391	72	1	Slc40a1		0.998884	0.72956	0.696903	0.855856		0.843011		9.80574	1.43172	1.20118	2.56986		2.42489
1	Dnah7b									0	105	0	53	5	87	1	Dnah7b					0.00934579	0.0181818	0.0638298					-6.72792	-5.75489	-3.87447
1	Slc39a10	424	457	1015	1065	782	608	676	543	1347	555	356	143	556	384	1	Slc39a10	0.481314	0.487992	0.5625	0.554464	0.707983	0.712575	0.591295	-0.107885	-0.069307	0.36257	0.315549	1.27766	1.30986	0.532819
1	Cavin2	4904	3788	0	575											1	Cavin2	0.564182	0.0017331						0.372436	-9.16993
1	Nabp1	410	210			230	254	277	154	275	237	131	67	152	86	1	Nabp1	0.660772		0.475309	0.642032	0.536965	0.66	0.6375	0.961895		-0.142604	0.842817	0.213707	0.956931	0.814444
1	Myo1b	683	738	0	503	600	686	502	538	1172	1708	316	155	449	457	1	Myo1b	0.480675	0.0019802	0.466615	0.482726	0.407009	0.67019	0.495595	-0.111578	-8.97728	-0.192945	-0.0997269	-0.542949	1.02294	-0.0254226
1	Stat4									289	156	92	90	0	94	1	Stat4					0.64877	0.505435	0.0104167					0.885288	0.0313642	-6.56986
1	Stat1	352	384	305	296	51	422	116	265	717	570	73	35	178	205	1	Stat1	0.47832	0.507463	0.109474	0.305483	0.557021	0.672727	0.464935	-0.12519	0.0430687	-3.02407	-1.18492	0.330493	1.03953	-0.202685
1	Gls	629	371	28	1336	479	1015	128	212	332	438	62	29	74	43	1	Gls	0.628743	0.0212299	0.320856	0.377193	0.431347	0.677419	0.630252	0.760049	-5.5268	-1.08179	-0.723482	-0.398699	1.07039	0.769387
1	Nab1	210	258			224	304	95	135	69	156					1	Nab1	0.448936		0.424528	0.413793	0.30837			-0.295709		-0.438884	-0.5025	-1.16534
1	Nemp2	99	117	794	529	210	276	290	172	533	318	7	51	69	104	1	Nemp2	0.458716	0.6	0.432377	0.627155	0.626026	0.133333	0.4	-0.238787	0.584963	-0.392643	0.750247	0.743283	-2.70044	-0.584963
1	Mfsd6			17	107	335	334	16	31	0	127					1	Mfsd6		0.142857	0.500745	0.346939	0.00775194				-2.58496	0.00430014	-0.912537	-7
1	Inpp1	53	187			76	87	21	24							1	Inpp1	0.22314		0.466667	0.468085				-1.7997		-0.192645	-0.184425
1	Hibch	403	905	1612	548	370	640	556	276	983	1152	413	188	347	336	1	Hibch	0.308397	0.746068	0.366601	0.667866	0.460459	0.686567	0.508029	-1.16516	1.55487	-0.788905	1.00779	-0.228662	1.13124	0.0463387
1	1700019D03Rik			1337	171	1141	401	870	223	2058	313	818	71	614	111	1	1700019D03Rik		0.886093	0.739637	0.795434	0.867678	0.919192	0.845942		2.9596	1.5063	1.95917	2.71311	3.50779	2.45709
1	1700019A02Rik					38	7	91	151	198	136	129	66	87	94	1	1700019A02Rik			0.829787	0.377049	0.592262	0.659898	0.480874			2.2854	-0.724366	0.538593	0.956279	-0.110424
1	Pms1	163	100	591	885	384	444	348	228	766	1131	350	242	465	647	1	Pms1	0.618868	0.400541	0.463855	0.603806	0.403897	0.590909	0.418312	0.699341	-0.58171	-0.208947	0.607879	-0.561575	0.530515	-0.475664
1	Ormdl1	227	170	212	443	189	175	134	118	455	332	78	68	111	111	1	Ormdl1	0.571429	0.324201	0.519126	0.531496	0.577947	0.533784	0.5	0.415037	-1.05971	0.110424	0.181998	0.453512	0.195256	0
1	Osgepl1	126	120	1107	609	665	503	255	794	1233	856	478	96	650	529	1	Osgepl1	0.512097	0.644936	0.569231	0.243578	0.590148	0.831597	0.551228	0.0698214	0.861077	0.402098	-1.63481	0.525975	2.30397	0.296665
1	Asnsd1	1741	1870	3225	404	2203	2188	967	684	3304	2090	1599	625	1893	572	1	Asnsd1	0.482148	0.88846	0.501707	0.585602	0.612491	0.718778	0.767734	-0.103065	2.99375	0.00985227	0.498903	0.660457	1.35384	1.72483
1	Dnah7a									0	126					1	Dnah7a					0.0078125							-6.98868
1	Stk17b	490	852	0	264	104	279	119	303	312	366	90	25	169	109	1	Stk17b	0.365327	0.0037594	0.272727	0.283019	0.460294	0.777778	0.607143	-0.796823	-8.04985	-1.41504	-1.34104	-0.229617	1.80735	0.628031
1	Hecw2									171	410	88	119	200	270	1	Hecw2					0.295026	0.425837	0.425847					-1.25673	-0.431157	-0.431097
1	Ccdc150			1	253											1	Ccdc150		0.0078125							-6.98868
1	Gtf3c3	210	285	1055	538	646	531	389	358	1056	1460	443	251	515	463	1	Gtf3c3	0.424547	0.662069	0.54877	0.520694	0.419778	0.637931	0.526531	-0.438772	0.970253	0.282339	0.11949	-0.466981	0.817136	0.153246
1	Pgap1			0	654	76	392	55	134	213	384	20	39	72	53	1	Pgap1		0.00152439	0.16383	0.293194	0.357262	0.344262	0.574803		-9.35535	-2.3516	-1.26946	-0.847248	-0.929611	0.434937
1	Sf3b1	1446	2690	1557	1926	2930	4503	1985	3641	4538	7168	1526	1758	2420	2097	1	Sf3b1	0.349686	0.447059	0.394217	0.352878	0.387684	0.464699	0.535738	-0.895077	-0.306661	-0.619814	-0.874865	-0.659397	-0.204055	0.206588
1	Coq10b	1761	3121	799	1524	945	2169	411	296	1154	851	405	197	368	387	1	Coq10b	0.36077	0.344086	0.303594	0.5811	0.575486	0.672185	0.48745	-0.825257	-0.930737	-1.19778	0.472181	0.438968	1.03598	-0.0724358
1	Hspd1	927	1169	1071	1608	1208	1320	843	1180	2947	2007	1505	811	1653	1922	1	Hspd1	0.442326	0.399851	0.477866	0.41679	0.594835	0.649698	0.462399	-0.334312	-0.585859	-0.127816	-0.484694	0.553977	0.89117	-0.2174
1	Hspe1	2767	6655	2805	5874	2742	6082	2432	6298	6546	12499	2850	4406	8150	5779	1	Hspe1	0.293718	0.323235	0.310786	0.27863	0.343729	0.392808	0.585098	-1.26581	-1.06607	-1.14903	-1.37239	-0.933022	-0.628329	0.495908
1	Mob4	43	161	3	47	85	508	28	197	37	315	19	54	40	93	1	Mob4	0.213592	0.0769231	0.144538	0.127753	0.107345	0.266667	0.303704	-1.88042	-3.58496	-2.56526	-2.77138	-3.05585	-1.45943	-1.19704
1	Rftn2	242	165	0	323	0	66			288	344			18	51	1	Rftn2	0.594132	0.00307692	0.0147059		0.455836		0.267606	0.549773	-8.33985	-6.06609		-0.255527		-1.45251
1	Mars2	210	333	505	396	222	347	78	293	341	349	139	127	200	372	1	Mars2	0.387156	0.560354	0.390543	0.211796	0.49422	0.522388	0.350174	-0.662605	0.349998	-0.642044	-1.89589	-0.0333586	0.129283	-0.89198
1	Boll					34	16			22	190					1	Boll			0.673077		0.107477					1.04182		-3.05387
1	Plcl1									0	55					1	Plcl1					0.0175439							-5.80735
1	Satb2					0	427			0	48			34	65	1	Satb2			0.002331		0.02		0.346535			-8.74147		-5.61471		-0.915111
1	4930558J18Rik	54	67			10	77	9	45	146	19			0	53	1	4930558J18Rik	0.447154		0.123596	0.178571	0.88024		0.0181818	-0.306103		-2.82597	-2.20163	2.87774		-5.75489
1	1700066M21Rik	95	136			126	50	78	48	65	42	53	43	0	67	1	1700066M21Rik	0.412017		0.713483	0.617188	0.605505	0.55102	0.0144928	-0.51307		1.31626	0.689071	0.618129	0.295456	-6.08746
1	Tyw5	73	164			82	162	18	35	168	135	111	46	68	108	1	Tyw5	0.309623		0.337398	0.345455	0.554098	0.704403	0.38764	-1.15687		-0.973689	-0.921997	0.313417	1.25277	-0.65966
1	Maip1	347	126	289	230	163	245	111	92	280	354	102	55	244	155	1	Maip1	0.732632	0.556622	0.4	0.546341	0.441824	0.647799	0.610973	1.45426	0.32816	-0.584963	0.268196	-0.337249	0.879146	0.651236
1	Spats2l	117	63	0	162	206	265	104	95	564	877	100	66	20	112	1	Spats2l	0.648352	0.00609756	0.437632	0.522388	0.391545	0.60119	0.156716	0.882643	-7.34873	-0.361795	0.129283	-0.63597	0.592122	-2.42786
1	Kctd18	104	96	0	122	216	72	56	54	296	133			6	41	1	Kctd18	0.519802	0.00806452	0.748276	0.508929	0.689095		0.142857	0.114333	-6.94251	1.57173	0.0515303	1.14823		-2.58496
1	Sgo2a	843	1228	1943	4412	2925	2066	2615	1840	7059	4389	3431	1356	2331	1949	1	Sgo2a	0.407139	0.305805	0.58602	0.586942	0.616594	0.716642	0.544605	-0.54217	-1.18273	0.501391	0.506873	0.685447	1.33863	0.258094
1	Aox1	75	174							0	204			0	130	1	Aox1	0.302789				0.00485437		0.00757576	-1.20328				-7.67948		-7.03342
1	Aox3															1	Aox3
1	Aox4													174	156	1	Aox4							0.527108							0.15659
1	Bzw1	1120	922	315	987	797	1074	659	538	1355	1270	566	285	839	966	1	Bzw1	0.548434	0.242331	0.426054	0.550459	0.516178	0.664713	0.464859	0.280384	-1.64459	-0.429876	0.292181	0.0933931	0.987334	-0.203127
1	Clk1	65	62	77	314	146	198	162	212	298	114	74	27	239	177	1	Clk1	0.511628	0.198473	0.424855	0.433511	0.722222	0.728155	0.574163	0.0671142	-2.01381	-0.436952	-0.385981	1.37851	1.42146	0.431157
1	Ppil3	174	171	79	337	201	168	102	190	279	182	80	45	125	131	1	Ppil3	0.504323	0.191388	0.544474	0.35034	0.604752	0.637795	0.488372	0.0249464	-2.07895	0.257332	-0.890928	0.613583	0.816288	-0.0671142
1	Nif3l1	813	642	468	660	949	725	523	450	1137	659	547	126	560	394	1	Nif3l1	0.558682	0.415044	0.566826	0.537436	0.632925	0.811852	0.58682	0.34021	-0.495062	0.387958	0.216439	0.785963	2.10935	0.506148
1	Orc2	387	500			640	477	523	528	2794	1651	1002	258	1177	653	1	Orc2	0.436445		0.572833	0.497626	0.628514	0.79477	0.643013	-0.368754		0.423314	-0.0137009	0.758635	1.9533	0.848977
1	Fam126b	93	67			119	143	32	40	150	214	45	49			1	Fam126b	0.580247		0.454545	0.445946	0.412568	0.479167		0.467126		-0.263034	-0.313158	-0.509788	-0.120294
1	Ndufb3	1303	1780	1757	2645	1574	1668	1682	1333	3282	2649	1104	516	1560	1045	1	Ndufb3	0.42269	0.399183	0.485512	0.557839	0.553346	0.681258	0.598773	-0.449744	-0.589878	-0.0836321	0.335277	0.309022	1.09581	0.577588
1	Cflar	537	835	2	432	72	148	94	303	212	1127					1	Cflar	0.391557	0.00688073	0.328829	0.238095	0.158837			-0.635897	-7.17326	-1.02934	-1.67807	-2.40484
1	Casp8	1347	1122	254	0	702	979	181	233	136	55					1	Casp8	0.545528	0.996094	0.417706	0.4375	0.709845			0.263463	7.99435	-0.479257	-0.36257	1.29068
1	Trak2	263	220	289	1175	108	336	191	161	522	347	97	102	165	290	1	Trak2	0.54433	0.197817	0.244395	0.542373	0.600459	0.487562	0.363239	0.256492	-2.01976	-1.62842	0.245112	0.587724	-0.0717907	-0.809836
1	Tmem237	226	506	1706	325	360	438	479	203	1176	465	392	105	134	302	1	Tmem237	0.309264	0.839646	0.45125	0.701754	0.716372	0.787575	0.308219	-1.15929	2.38852	-0.282222	1.23447	1.33671	1.89047	-1.16636
1	G730003C15Rik	4	79													1	G730003C15Rik	0.0588235							-4
1	Als2	356	416	57	0	278	339	240	442	481	232	188	114	731	159	1	Als2	0.46124	0.983051	0.450727	0.352339	0.674126	0.621711	0.820628	-0.224123	5.85798	-0.28527	-0.878274	1.0487	0.716752	2.19377
1	Fzd7	475	170			124	310	303	291	800	312	136	48	272	155	1	Fzd7	0.735703		0.286697	0.510067	0.719031	0.736559	0.636364	1.47697		-1.31499	0.058103	1.35564	1.48332	0.807355
1	Sumo1									140	306	32	27	48	101	1	Sumo1					0.314732	0.540984	0.324503					-1.12254	0.237039	-1.05772
1	Nop58	1018	854	903	1369	871	960	818	790	2251	1550	970	540	888	1244	1	Nop58	0.543757	0.397537	0.475723	0.508696	0.592164	0.642196	0.416589	0.253158	-0.599781	-0.140208	0.0501858	0.538008	0.843843	-0.48589
1	Bmpr2	271	403			223	198	57	126	286	792			32	71	1	Bmpr2	0.402367		0.529551	0.313514	0.265741		0.314286	-0.570749		0.17073	-1.1307	-1.46627		-1.12553
1	Fam117b					9	73	32	28	61	356			12	38	1	Fam117b			0.119048	0.532258	0.147971		0.25			-2.88753	0.186413	-2.52558		-1.58496
1	Ica1l			196	310	97	110	38	75	141	230	74	53	239	145	1	Ica1l		0.387795	0.4689	0.33913	0.380697	0.581395	0.621762		-0.658719	-0.179706	-0.962525	-0.702002	0.473931	0.717066
1	Wdr12	1574	1460	3325	3495	1957	1937	1428	1646	4258	2775	2065	1093	2473	1690	1	Wdr12	0.518775	0.48754	0.502567	0.464564	0.605402	0.653797	0.593998	0.108396	-0.071917	0.0148122	-0.204835	0.617507	0.917228	0.548969
1	Carf	29	42	0	58	50	89			69	223			14	30	1	Carf	0.410959	0.0166667	0.361702		0.238095		0.326087	-0.519374	-5.88264	-0.819428		-1.67807		-1.04731
1	Nbeal1	86	404			69	58	140	261	111	287			104	172	1	Nbeal1	0.176829		0.542636	0.349876	0.28		0.377698	-2.21883		0.24664	-0.893872	-1.36257		-0.720383
1	Cyp20a1	396	363			140	150	110	59	144	44	64	17	87	56	1	Cyp20a1	0.521682		0.482877	0.649123	0.763158	0.783133	0.606897	0.125201		-0.0988534	0.887525	1.68806	1.85244	0.626542
1	Abi2	71	119	0	162	39	85	72	138	327	245	92	63	54	94	1	Abi2	0.375	0.00609756	0.31746	0.34434	0.571429	0.592357	0.366667	-0.736966	-7.34873	-1.10434	-0.929117	0.415037	0.539159	-0.788496
1	Raph1	524	715	186	348	546	237	385	373	340	381	73	85	164	279	1	Raph1	0.423046	0.348881	0.696815	0.507895	0.471646	0.4625	0.370787	-0.447642	-0.900189	1.20058	0.0455626	-0.163801	-0.216811	-0.762961
1	Nrp2	459	294	791	1663	1545	3078	379	1295	451	1933	266	277	146	977	1	Nrp2	0.609272	0.322476	0.33427	0.22673	0.189438	0.489908	0.130667	0.640919	-1.07108	-0.993922	-1.76999	-2.09719	-0.0582451	-2.73402
1	Ino80dos					24	53	81	173	152	238			102	363	1	Ino80dos			0.316456	0.320312	0.390306		0.220557			-1.11103	-1.08539	-0.643479		-1.82129
1	Ndufs1	1057	795	2257	2602	1812	1568	916	843	2279	1625	926	448	1087	869	1	Ndufs1	0.570658	0.464513	0.536073	0.520727	0.583717	0.673692	0.555669	0.410499	-0.20513	0.208534	0.119679	0.487707	1.04585	0.322591
1	Eef1b2	3756	3961	4165	4174	4100	4076	3163	3657	4099	3953	2111	1010	2616	2815	1	Eef1b2	0.486721	0.49946	0.501467	0.463794	0.509064	0.676273	0.481686	-0.0766478	-0.00311336	0.00846779	-0.209305	0.052311	1.06283	-0.105733
1	Platr12							71	29	252	66	98	77	110	122	1	Platr12				0.705882	0.790625	0.559322	0.474359				1.26303	1.9169	0.343954	-0.148099
1	Zdbf2			0	440	61	93	157	183	501	600	205	121	278	347	1	Zdbf2		0.00226244	0.397436	0.461988	0.455122	0.628049	0.444976		-8.78463	-0.600393	-0.219781	-0.259678	0.755763	-0.318822
1	Adam23			693	750	1028	274	639	183	2037	699	412	104	817	208	1	Adam23		0.480277	0.78911	0.776699	0.744339	0.797297	0.796495		-0.113877	1.90374	1.79837	1.54173	1.97575	1.9686
1	Fastkd2	315	109	342	1312	759	493	403	137	732	673	348	250	554	542	1	Fastkd2	0.741784	0.207126	0.606061	0.745387	0.520967	0.581667	0.505464	1.52242	-1.93659	0.621488	1.54969	0.121065	0.47554	0.0315356
1	Klf7									119	206			11	55	1	Klf7					0.366972		0.176471					-0.786596		-2.22239
1	Creb1	111	253	171	289	164	264	126	121	295	457	41	58	44	84	1	Creb1	0.306011	0.372294	0.383721	0.51004	0.392573	0.415842	0.346154	-1.18133	-0.753644	-0.683526	0.0579473	-0.62975	-0.490326	-0.917538
1	Mettl21a	511	525	111	351	200	72	141	170	683	108	105	45	26	24	1	Mettl21a	0.493256	0.241379	0.733577	0.453674	0.862547	0.697368	0.519231	-0.038919	-1.65208	1.46123	-0.268105	2.64967	1.20436	0.111031
1	Ccnyl1	222	226			174	235	121	154	261	583	62	27	40	30	1	Ccnyl1	0.495556		0.425791	0.440433	0.309693	0.692308	0.569444	-0.0256486		-0.431432	-0.345387	-1.1564	1.16993	0.403356
1	Fzd5	122	60	78	23	2	44	55	171	116	514			4	87	1	Fzd5	0.668478	0.76699	0.0625	0.245614	0.185127		0.0537634	1.01178	1.71882	-3.90689	-1.61891	-2.13806		-4.1375
1	Plekhm3	8	47	0	658	275	371	327	393	632	736	86	119	60	70	1	Plekhm3	0.157895	0.00151515	0.425926	0.454294	0.462044	0.42029	0.462121	-2.41504	-9.36413	-0.430634	-0.2645	-0.219459	-0.463947	-0.21901
1	D630023F18Rik					85	116	186	276	518	302	315	190	473	249	1	D630023F18Rik			0.423645	0.403017	0.631387	0.623274	0.654696			-0.4441	-0.566848	0.776417	0.726352	0.922959
1	Idh1	473	418	625	629	766	569	474	431	1061	1069	314	166	346	296	1	Idh1	0.530795	0.498408	0.573672	0.523705	0.498124	0.653527	0.53882	0.177937	-0.00918917	0.428265	0.136896	-0.010827	0.915504	0.224473
1	Pikfyve	64	192	136	870	109	187	143	322	330	367	92	32	146	96	1	Pikfyve	0.251938	0.135913	0.369128	0.308351	0.473534	0.738095	0.602459	-1.57009	-2.6685	-0.773229	-1.16547	-0.152875	1.49476	0.59976
1	Map2	664	347	2114	287	375	644	85	127	492	318			102	19	1	Map2	0.656466	0.88015	0.368266	0.401869	0.607143		0.837398	0.934267	2.87652	-0.778566	-0.573735	0.628031		2.36457
1	Rpe	88	274	161	83	165	435	75	438	616	679	165	205	217	396	1	Rpe	0.244505	0.658537	0.275748	0.147573	0.475713	0.446237	0.354472	-1.62755	0.947533	-1.39314	-2.53015	-0.140264	-0.311461	-0.864811
1	Kansl1l	38	15	0	145	89	47	120	169	1737	623	89	33	520	230	1	Kansl1l	0.709091	0.00680272	0.652174	0.415808	0.735817	0.725806	0.692819	1.2854	-7.18982	0.906891	-0.490528	1.47781	1.40439	1.17339
1	Acadl	1746	4221	2298	2490	1393	2088	1012	1348	1750	2250	665	233	1035	287	1	Acadl	0.292679	0.479958	0.40023	0.428874	0.437531	0.74	0.782477	-1.27305	-0.115719	-0.583582	-0.413256	-0.362387	1.50901	1.84688
1	Lancl1	265	201	238	94	259	432	218	348	554	449	269	144	171	416	1	Lancl1	0.568376	0.715569	0.37518	0.385563	0.552239	0.650602	0.29202	0.397071	1.33101	-0.735855	-0.672296	0.302563	0.896907	-1.27764
1	Erbb4	0	44							158	87					1	Erbb4	0.0217391				0.643725			-5.49185				0.853451
1	Ikzf2	32	20			0	62			125	636			0	70	1	Ikzf2	0.611111		0.015625		0.165138		0.0138889	0.652077		-5.97728		-2.33787		-6.14975
1	Bard1	8	50	8	258	220	633	274	360	584	1125	176	185	94	401	1	Bard1	0.15	0.0335821	0.25848	0.43239	0.341905	0.487603	0.191147	-2.5025	-4.84688	-1.52044	-0.392567	-0.944698	-0.0715533	-2.0812
1	Abca12							70	178	0	128					1	Abca12				0.284	0.00769231						-1.33407	-7.01123
1	Atic	2525	6327	1125	9050	3623	7053	1233	4310	3811	7443	1804	2906	1700	6117	1	Atic	0.285295	0.110642	0.339389	0.222543	0.338664	0.383065	0.217547	-1.32489	-3.00687	-0.960859	-1.80468	-0.96553	-0.687532	-1.84668
1	Fn1	53999	37045	5184	3128	3671	2982	3322	3205	9914	6765	1501	663	2540	1974	1	Fn1	0.593107	0.623647	0.551766	0.50896	0.594389	0.693444	0.562666	0.543642	0.728642	0.299802	0.0517119	0.55131	1.17763	0.363544
1	Apol7d									54	60					1	Apol7d					0.474138							-0.149378
1	4933417E11Rik									0	75					1	4933417E11Rik					0.012987							-6.24793
1	Mreg	18	37	182	724	932	2129	497	1091	2069	3073	1237	1453	2378	1094	1	Mreg	0.333333	0.201542	0.304603	0.313208	0.402411	0.459881	0.684801	-1	-1.98614	-1.1909	-1.13276	-0.570486	-0.232016	1.11942
1	D230017M19Rik			0	183					40	265					1	D230017M19Rik		0.00540541			0.13355				-7.52356			-2.69773
1	Pecr	122	195	366	250	391	376	302	266	529	651	197	160	520	116	1	Pecr	0.38558	0.593851	0.509753	0.531579	0.448393	0.551532	0.816614	-0.672195	0.548093	0.0562891	0.182478	-0.29888	0.29844	2.15477
1	Xrcc5	963	760	1320	772	3103	2633	3268	2778	8364	3213	4451	1143	3678	2285	1	Xrcc5	0.558841	0.63085	0.540955	0.540509	0.722429	0.795568	0.616764	0.341137	0.77309	0.236873	0.234284	1.38	1.96037	0.686488
1	Smarcal1	73	272	466	502	280	386	205	196	653	1526	190	120	287	193	1	Smarcal1	0.213256	0.481443	0.420659	0.511166	0.299862	0.612179	0.59751	-1.8833	-0.107136	-0.461763	0.0644487	-1.22334	0.658566	0.570012
1	Rpl37a	2065	4545	1807	4899	1159	4049	1350	4687	3755	5045	1239	2729	1639	4834	1	Rpl37a	0.312462	0.269529	0.222649	0.223713	0.426721	0.312343	0.253282	-1.13776	-1.43839	-1.8038	-1.79494	-0.425943	-1.13856	-1.55982
1	Igfbp2	412	516	1235	435	1821	1076	1789	1609	2938	3371	923	731	1220	1540	1	Igfbp2	0.444086	0.739234	0.628493	0.526471	0.465695	0.557971	0.442071	-0.324022	1.50328	0.758505	0.152899	-0.198279	0.336049	-0.335804
1	Igfbp5									2364	2366					1	Igfbp5					0.499789							-0.00121952
1	Tns1	2222	2283	2768	1661	1370	1698	387	224	330	833	44	91	110	136	1	Tns1	0.493233	0.624915	0.44658	0.632953	0.28412	0.328467	0.447581	-0.0390547	0.736445	-0.309457	0.786132	-1.33322	-1.03171	-0.303616
1	Rufy4			90	0	58	40									1	Rufy4		0.98913	0.59						6.50779	0.525091
1	Arpc2	2326	1878	2650	2041	1788	1735	1119	922	2164	1896	655	264	690	592	1	Arpc2	0.553257	0.564884	0.507518	0.548213	0.532989	0.712269	0.538162	0.308506	0.376554	0.0433864	0.279096	0.190647	1.3077	0.220654
1	Gpbar1	27	455													1	Gpbar1	0.0578512							-4.02554
1	Tmbim1	2133	394	328	270	505	47	462	128	925	121			176	94	1	Tmbim1	0.843812	0.548333	0.913357	0.782095	0.883588		0.650735	2.43364	0.279795	3.39803	1.84364	2.92413		0.89775
1	Slc11a1			0	147	24	131	93	306							1	Slc11a1		0.00671141	0.159236	0.234414					-7.20945	-2.40054	-1.70751
1	Vil1			0	152	48	42									1	Vil1		0.00649351	0.532609						-7.25739	0.188445
1	Usp37	44	181	75	699	1662	1091	704	900	1968	1901	931	341	1185	853	1	Usp37	0.198238	0.0979381	0.60363	0.438979	0.508654	0.731554	0.581373	-2.01594	-3.20328	0.606815	-0.353904	0.0499459	1.44633	0.473796
1	Cnot9	1816	1910	2060	1499	2514	2044	2667	1723	3877	3080	1866	725	3260	2708	1	Cnot9	0.487393	0.57877	0.551535	0.607468	0.557264	0.720015	0.546231	-0.0727694	0.458382	0.298458	0.629999	0.331914	1.36268	0.267554
1	Zfp142	82	177	172	67	89	195	81	111	246	284	21	32	140	188	1	Zfp142	0.318008	0.717842	0.314685	0.42268	0.464286	0.4	0.427273	-1.10069	1.34717	-1.12286	-0.449803	-0.206451	-0.584963	-0.422691
1	Bcs1l	138	383	314	874	223	448	66	135	220	263	132	158	183	274	1	Bcs1l	0.265774	0.264706	0.332838	0.330049	0.45567	0.455479	0.400871	-1.46602	-1.47393	-1.00322	-1.02137	-0.256492	-0.257601	-0.579726
1	Rnf25	261	511	55	84	237	232	171	124	492	343	111	55	250	89	1	Rnf25	0.338501	0.397163	0.505308	0.579125	0.589008	0.666667	0.73607	-0.966577	-0.602036	0.0306316	0.46048	0.519179	1	1.47969
1	Stk36							0	180	17	173	17	78	0	53	1	Stk36				0.00549451	0.09375	0.185567	0.0181818				-7.49985	-3.27302	-2.13386	-5.75489
1	Ttll4	288	238			780	830	421	590	884	1098	265	176	619	951	1	Ttll4	0.547348		0.484491	0.416584	0.446069	0.600451	0.394402	0.274059		-0.0895259	-0.485915	-0.312442	0.587677	-0.618693
1	Nhej1							119	113	468	119	136	68	93	84	1	Nhej1				0.512821	0.796265	0.665049	0.52514				0.0740006	1.96655	0.989508	0.145198
1	Slc23a3					151	37	96	33							1	Slc23a3			0.8	0.740458						2	1.51245
1	Cnppd1	104	231	378	63	258	128	137	118	118	186	36	8			1	Cnppd1	0.311573	0.85553	0.667526	0.536965	0.388889	0.804348		-1.14374	2.56605	1.00558	0.213707	-0.652077	2.03953
1	Retreg2	254	166	0	111	66	105	101	61	237	100	34	24			1	Retreg2	0.604265	0.00884956	0.387283	0.621951	0.702065	0.583333		0.610649	-6.80735	-0.661831	0.718229	1.23661	0.485427
1	Zfand2b	451	685	2982	833	696	960	355	571	889	770	243	71	124	245	1	Zfand2b	0.397188	0.781504	0.420386	0.383621	0.535822	0.772152	0.336927	-0.601886	1.83864	-0.463378	-0.684138	0.207074	1.76081	-0.97673
1	Abcb6	65	52	926	435	448	548	261	360	531	234	166	46	357	112	1	Abcb6	0.554622	0.680117	0.4499	0.420546	0.693611	0.780374	0.760085	0.316474	1.08824	-0.290091	-0.462432	1.17877	1.82912	1.66364
1	Atg9a	443	306			355	260	148	217	295	98			77	164	1	Atg9a	0.591212		0.576985	0.405995	0.749367		0.320988	0.532321		0.447827	-0.549016	1.5801		-1.08092
1	Ankzf1	143	159	579	589	403	391	375	325	724	963	107	109	302	162	1	Ankzf1	0.473684	0.495726	0.507538	0.535613	0.429248	0.495413	0.650215	-0.152003	-0.0246621	0.0435016	0.205861	-0.411052	-0.0264722	0.894446
1	Glb1l	46	73	78	151	31	31	29	56	85	66			26	21	1	Glb1l	0.38843	0.341991	0.5	0.344828	0.562092		0.55102	-0.654865	-0.944147	0	-0.925999	0.360176		0.295456
1	Stk16	442	546	47	506	229	217	218	108	295	541	153	99	267	375	1	Stk16	0.447475	0.0864865	0.513393	0.667683	0.353222	0.606299	0.416149	-0.304234	-3.40088	0.0773057	1.0066	-0.872696	0.62293	-0.4885
1	Tuba4a	161	316	1124	578	1100	879	330	451	482	693	264	253	313	635	1	Tuba4a	0.338205	0.660211	0.55578	0.422733	0.410365	0.510597	0.330526	-0.968489	0.95829	0.323239	-0.449492	-0.522912	0.0611639	-1.01826
1	Dnajb2	157	315	0	137	96	96	210	68	176	185			0	122	1	Dnajb2	0.333333	0.00719424	0.5	0.753571	0.487603		0.00806452	-1	-7.10852	0	1.61257	-0.0715533		-6.94251
1	Ptprn	566	334							0	42					1	Ptprn	0.628603				0.0227273			0.759188				-5.42626
1	Dnpep	1354	1640	539	638	1189	1037	699	945	1173	1417	322	257	469	606	1	Dnpep	0.45227	0.458015	0.534111	0.425273	0.452932	0.555938	0.436397	-0.276282	-0.242857	0.197155	-0.434485	-0.272425	0.324163	-0.369036
1	Speg	291	712	172	60			45	71	214	332					1	Speg	0.290547	0.739316		0.389831	0.392336			-1.28793	1.50389		-0.646363	-0.631186
1	Chpf	2477	2472	595	293	1094	735	244	274	657	745	121	81	54	53	1	Chpf	0.500505	0.669663	0.598034	0.471154	0.468661	0.598039	0.504587	0.00291395	1.0195	0.573153	-0.16665	-0.181088	0.573185	0.0264722
1	Tmem198			248	114	207	207									1	Tmem198		0.684066	0.5						1.11451	0
1	Stk11ip	223	182	0	1215	674	321	377	289	1600	426	197	34	68	59	1	Stk11ip	0.550369	0.000821693	0.677031	0.565868	0.789448	0.849785	0.534884	0.291655	-10.2479	1.06783	0.382333	1.90667	2.50007	0.201634
1	Slc4a3	52	98	0	388	168	1	122	101	140	146					1	Slc4a3	0.348684	0.0025641	0.988304	0.546667	0.489583			-0.901436	-8.60363	6.40088	0.270089	-0.060121
1	Epha4	18	120	80	109	62	407	25	185	471	868	134	217	311	510	1	Epha4	0.135714	0.424084	0.133758	0.122642	0.351976	0.382436	0.379101	-2.67094	-0.44151	-2.69515	-2.83872	-0.880569	-0.691369	-0.711777
1	Sgpp2													0	57	1	Sgpp2							0.0169492							-5.85798
1	Farsb	74	600	95	1456	196	1262	117	863	221	2612	95	544	2444	2354	1	Farsb	0.110947	0.0618158	0.134932	0.120163	0.0783069	0.149766	0.509375	-3.0024	-3.92382	-2.68059	-2.87224	-3.55708	-2.50515	0.0541074
1	5730419F03Rik													58	196	1	5730419F03Rik							0.230469							-1.73941
1	Utp14b	0	152			263	227	199	320	344	209	31	16	45	47	1	Utp14b	0.00649351		0.536585	0.383877	0.621622	0.653061	0.489362	-7.25739		0.211504	-0.682573	0.716207	0.912537	-0.0614005
1	Ap1s3					76	612	0	352	12	997	0	76	10	500	1	Ap1s3			0.111594	0.00282486	0.0128586	0.0128205	0.0214844			-2.99296	-8.46352	-6.26246	-6.26679	-5.50924
1	Wdfy1	3853	3663	2158	4741	2493	3644	1391	1895	3597	4995	1250	1162	834	1381	1	Wdfy1	0.512636	0.312853	0.406255	0.423358	0.418664	0.518227	0.376635	0.0729371	-1.13513	-0.547457	-0.4458	-0.473578	0.105231	-0.72691
1	Mrpl44	746	580	295	1741	1201	1043	834	982	1920	1424	859	379	1242	1532	1	Mrpl44	0.5625	0.14524	0.535174	0.459296	0.574118	0.693548	0.447767	0.36257	-2.55708	0.203315	-0.235415	0.430896	1.17834	-0.302531
1	Serpine2	3439	2073	1024	2130	139	1251	463	602	969	989	174	198	426	496	1	Serpine2	0.623867	0.324778	0.100575	0.434864	0.494898	0.467914	0.462121	0.729993	-1.05591	-3.16074	-0.378033	-0.0294438	-0.185414	-0.21901
1	Cul3	28	82	0	42	70	100			294	292	26	30	14	111	1	Cul3	0.258929	0.0227273	0.412791		0.501701	0.465517	0.11811	-1.51706	-5.42626	-0.508464		0.00981429	-0.199309	-2.90046
1	Dock10			0	304											1	Dock10		0.00326797							-8.25267
1	Irs1	39	239	0	102					145	365					1	Irs1	0.142857	0.00961538			0.285156			-2.58496	-6.6865			-1.32588
1	Rhbdd1	909	1173	2661	3026	445	447	122	336	348	2277	218	101	652	791	1	Rhbdd1	0.43666	0.467921	0.498881	0.267391	0.132851	0.682243	0.451903	-0.367494	-0.185378	-0.00645502	-1.45409	-2.70647	1.10236	-0.278417
1	Mff	900	733	862	541	1294	684	727	490	1738	995	841	254	919	638	1	Mff	0.55107	0.614235	0.65404	0.597211	0.635832	0.767548	0.590122	0.295747	0.671068	0.918776	0.568215	0.80404	1.72332	0.525818
1	Tm4sf20													0	148	1	Tm4sf20							0.00666667							-7.21917
1	Agfg1	635	1121	781	684	1213	736	390	395	1376	1209	447	185	289	261	1	Agfg1	0.361775	0.533061	0.622245	0.496823	0.532277	0.706625	0.525362	-0.818974	0.191065	0.720032	-0.0183318	0.186522	1.2682	0.146486
1	Slc19a3					16	129							0	65	1	Slc19a3			0.115646				0.0149254			-2.9349				-6.04439
1	Sphkap															1	Sphkap
1	4933436I20Rik					0	152	0	53							1	4933436I20Rik			0.00649351	0.0181818						-7.25739	-5.75489
1	Pid1	171	195	0	171			147	84	286	143	83	48	58	82	1	Pid1	0.467391	0.00578035		0.635193	0.665893	0.631579	0.415493	-0.188445	-7.42626		0.800062	0.994982	0.777608	-0.492396
1	Trip12	137	234	270	923	674	920	578	956	1740	1186	707	334	652	839	1	Trip12	0.369973	0.226778	0.422932	0.376953	0.594604	0.678811	0.437374	-0.767992	-1.7696	-0.448314	-0.724956	0.552596	1.07959	-0.363306
1	Fbxo36	138	61					73	55	245	210	118	30			1	Fbxo36	0.691542			0.569231	0.538293	0.793333		1.16474			0.402098	0.221415	1.94062
1	Cab39	173	165	502	1051	258	528	150	273	344	205	65	29			1	Cab39	0.511765	0.323473	0.32868	0.355294	0.626134	0.6875		0.0679041	-1.0645	-1.03032	-0.859627	0.743952	1.1375
1	Itm2c	1381	2097	591	872	281	228	346	385	721	596	148	93	71	147	1	Itm2c	0.397126	0.404096	0.551859	0.473397	0.547384	0.613169	0.327273	-0.602257	-0.560384	0.300348	-0.153665	0.274268	0.66458	-1.03953
1	Psmd1	1918	2088	1227	1574	1952	2247	1738	1571	3806	2697	1598	858	2077	1974	1	Psmd1	0.478792	0.438102	0.464889	0.525219	0.585242	0.650529	0.512707	-0.122458	-0.359041	-0.20295	0.145657	0.496764	0.89644	0.073343
1	Htr2b													103	272	1	Htr2b							0.275862							-1.39232
1	Armc9	346	272			204	162	141	263	1025	569	222	101	356	311	1	Armc9	0.559677		0.557065	0.349754	0.642857	0.686154	0.533632	0.346035		0.330752	-0.894647	0.847997	1.12847	0.194378
1	B3gnt7			0	135	235	229	140	220	492	344	271	194	365	399	1	B3gnt7		0.00729927	0.506438	0.389503	0.588305	0.582441	0.477807		-7.08746	0.037153	-0.648351	0.514991	0.480133	-0.128156
1	Ncl	182	190	131	770	699	583	364	346	836	830	403	221	766	603	1	Ncl	0.489305	0.146179	0.545171	0.51264	0.501799	0.645367	0.559446	-0.061729	-2.54619	0.261387	0.0729608	0.0103791	0.863796	0.344678
1	C130036L24Rik					38	11			30	69					1	C130036L24Rik			0.764706		0.306931					1.70044		-1.17509
1	Ptma	2217	3686	2798	3917	3230	4504	3931	4264	4009	4024	4019	3437	4031	3936	1	Ptma	0.375614	0.416704	0.417658	0.479688	0.499067	0.539019	0.505961	-0.733188	-0.485206	-0.479546	-0.117282	-0.00538655	0.225626	0.0343989
1	Pde6d									61	148					1	Pde6d					0.293839							-1.26497
1	Cops7b	286	345	0	160	392	482	188	242	929	420	412	205	545	388	1	Cops7b	0.453397	0.00617284	0.44863	0.4375	0.688379	0.667205	0.583957	-0.269721	-7.33092	-0.297494	-0.36257	1.14341	1.0035	0.489131
1	Dis3l2	87	1651	147	3372	125	2576	157	1832	403	2864	44	622	85	1708	1	Dis3l2	0.0505747	0.0420335	0.0466149	0.0793571	0.123585	0.0673653	0.0479109	-4.23057	-4.51036	-4.3542	-3.53621	-2.82611	-3.79124	-4.31267
1	Ecel1			5	99					60	80	13	28	18	31	1	Ecel1		0.0566038			0.429577	0.325581	0.372549		-4.05889			-0.409113	-1.05063	-0.752072
1	Eif4e2	1365	859	1079	2098	1888	1586	743	820	2263	1585	1355	677	1167	1450	1	Eif4e2	0.613657	0.339729	0.543441	0.475399	0.588052	0.666667	0.445972	0.667549	-0.958671	0.251321	-0.14208	0.513481	1	-0.313007
1	Gigyf2			0	54			12	62							1	Gigyf2		0.0178571		0.171053					-5.78136		-2.27684
1	Ngef	43	25	782	1619	1494	1185	469	542	0	87					1	Ngef	0.628571	0.325843	0.557628	0.463968	0.011236			0.758992	-1.04891	0.334041	-0.208291	-6.45943
1	Neu2															1	Neu2
1	Inpp5d			1576	1971	1562	1217	1581	954	2483	1462	1327	680	1399	1241	1	Inpp5d		0.444351	0.562028	0.623571	0.629339	0.661025	0.529902		-0.322477	0.359804	0.728177	0.763735	0.963528	0.172762
1	Atg16l1	31	99	61	48	180	139	51	82	106	184	40	19	31	68	1	Atg16l1	0.242424	0.558559	0.563863	0.385185	0.366438	0.672131	0.316832	-1.64386	0.339486	0.370563	-0.6746	-0.789914	1.03562	-1.10852
1	Dgkd									26	16					1	Dgkd					0.613636							0.667425
1	Usp40	130	199			137	179	53	56	258	376	68	82	190	108	1	Usp40	0.39577		0.433962	0.486486	0.407233	0.453947	0.636667	-0.610433		-0.383329	-0.0780025	-0.541612	-0.266515	0.809245
1	Ugt1a7c	263	73	544	33	15	31	126	402	0	135					1	Ugt1a7c	0.781065	0.941278	0.333333	0.239623	0.00729927			1.83494	4.00265	-1	-1.66595	-7.08746
1	Ugt1a6b	11	41	1372	849	451	595	213	144							1	Ugt1a6b	0.222222	0.617634	0.431298	0.5961				-1.80735	0.691797	-0.39899	0.561558
1	Ugt1a6a	100	208	1732	1156	1073	803	195	162	53	0			0	49	1	Ugt1a6a	0.325806	0.599654	0.571885	0.545961	0.981818		0.0196078	-1.04915	0.582883	0.417727	0.265982	5.75489		-5.64386
1	Ugt1a5			246	303											1	Ugt1a5		0.448276							-0.29956
1	Arl4c	112	146	0	64	41	16	43	30	68	224					1	Arl4c	0.434615	0.0151515	0.711864	0.586667	0.234694			-0.379493	-6.02237	1.30485	0.505235	-1.70526
1	Platr5			0	174	883	272	1754	621	1650	633	401	156	301	874	1	Platr5		0.00568182	0.764045	0.738326	0.722538	0.719141	0.256585		-7.45121	1.69515	1.49648	1.38079	1.35643	-1.53473
1	Sh3bp4	565	1213	1273	950	622	1684	503	1261	1138	1835	400	227	371	394	1	Sh3bp4	0.317978	0.572584	0.269931	0.285391	0.382857	0.63752	0.485007	-1.10089	0.421848	-1.43544	-1.32422	-0.688798	0.814568	-0.08655
1	Agap1	11	241	113	3780	44	169	13	181	22	580			47	342	1	Agap1	0.0472441	0.0292683	0.209302	0.0714286	0.0380795		0.122762	-4.3339	-5.05166	-1.91754	-3.70044	-4.65883		-2.8371
1	4933400F21Rik					2	74			0	116			25	30	1	4933400F21Rik			0.0384615		0.00847458		0.45614			-4.64386		-6.87036		-0.253757
1	D130058E05Rik					57	167	99	122	257	134	117	72	148	168	1	D130058E05Rik			0.256637	0.44843	0.656489	0.617801	0.468553			-1.53434	-0.298658	0.934412	0.692818	-0.181711
1	Iqca					37	35	33	231	74	85					1	Iqca			0.513514	0.12782	0.465839					0.0780025	-2.77052	-0.197446
1	Ackr3	451	819			135	177	326	259	580	993	129	22	49	73	1	Ackr3	0.355346		0.433121	0.55707	0.368889	0.849673	0.403226	-0.859301		-0.388271	0.330779	-0.774708	2.49881	-0.565597
1	Cops8	1839	1985	1260	1613	2144	1860	1118	919	4235	2486	1563	747	1666	1094	1	Cops8	0.48092	0.438609	0.535447	0.548798	0.630076	0.676471	0.603548	-0.11016	-0.356072	0.2049	0.282504	0.768296	1.06413	0.606323
1	Col6a3	4325	2298	1029	1164	0	354	27	27	423	515					1	Col6a3	0.652981	0.469248	0.00280899	0.5	0.451064			0.912027	-0.177686	-8.47168	0	-0.283307
1	Mlph	0	148			0	101	7	62	2	78					1	Mlph	0.00666667		0.00970874	0.112676	0.0365854			-7.21917		-6.67243	-2.97728	-4.71882
1	Rab17			8	188	3	246	6	126							1	Rab17		0.0454545	0.0159363	0.0522388					-4.39232	-5.94837	-4.18133
1	Lrrfip1	9943	13320	10775	12434	6754	6834	3073	4077	3277	2471	330	161	728	892	1	Lrrfip1	0.427423	0.464263	0.497057	0.42981	0.570087	0.6714	0.449445	-0.421804	-0.206585	-0.0169856	-0.407745	0.407137	1.03084	-0.292741
1	Rbm44					306	550	286	1135	1028	1548	217	308	161	867	1	Rbm44			0.357809	0.201687	0.399147	0.413662	0.157282			-0.843814	-1.98484	-0.590094	-0.503279	-2.4217
1	Ube2f	530	339	273	51	304	297	215	188	861	460	196	91	225	242	1	Ube2f	0.609644	0.840491	0.505804	0.533333	0.65155	0.681661	0.481876	0.643177	2.39759	0.0334969	0.192645	0.902921	1.09849	-0.104634
1	Scly			106	47	76	83	133	236	215	83			6	135	1	Scly		0.690323	0.478261	0.361186	0.72		0.048951		1.1565	-0.125531	-0.822654	1.36257		-4.28011
1	Erfe	54	327	783	1847	1066	450	322	335	102	193			6	37	1	Erfe	0.143603	0.297872	0.702899	0.490137	0.346801		0.155556	-2.57619	-1.23704	1.24236	-0.0569271	-0.913412		-2.44057
1	Ilkap	426	532	332	1385	484	554	311	327	802	800	182	120	311	315	1	Ilkap	0.444792	0.193717	0.466346	0.4875	0.500623	0.601974	0.496815	-0.319899	-2.05733	-0.194503	-0.0721498	0.00359775	0.596837	-0.0183785
1	Hes6	279	285	634	786	780	487	1283	845	954	611	250	98	641	641	1	Hes6	0.4947	0.446554	0.615445	0.602817	0.609445	0.717143	0.5	-0.0305883	-0.309607	0.678441	0.601916	0.641969	1.34219	0
1	Per2									0	58			24	75	1	Per2					0.0166667		0.247525					-5.88264		-1.60407
1	Traf3ip1	73	60			116	14	63	11	254	75	63	67	80	67	1	Traf3ip1	0.548148		0.886364	0.842105	0.770393	0.484848	0.543624	0.278716		2.96347	2.41504	1.74643	-0.0874628	0.252387
1	Asb1	15	345			62	2	53	6	163	271			64	131	1	Asb1	0.0441989		0.954545	0.885246	0.376147		0.329949	-4.43463		4.39232	2.94753	-0.729911		-1.02203
1	Twist2	367	447													1	Twist2	0.45098							-0.283793
1	Hdac4	116	90	481	1515	696	1076	218	247	403	499	18	22	51	365	1	Hdac4	0.5625	0.241241	0.392897	0.468951	0.446903	0.452381	0.124402	0.36257	-1.65316	-0.627788	-0.179409	-0.307573	-0.275634	-2.81526
1	Ndufa10	850	943	2626	1716	1417	1181	878	1095	2179	758	741	330	1100	837	1	Ndufa10	0.474095	0.604742	0.545385	0.445063	0.741749	0.691519	0.567818	-0.149628	0.613526	0.262627	-0.318313	1.52216	1.16459	0.393792
1	Cops9									10	115					1	Cops9					0.0866142							-3.39855
1	Ankmy1	157	156			76	239	50	65	122	173					1	Ankmy1	0.501587		0.242902	0.435897	0.414141			0.00916		-1.6401	-0.371969	-0.500429
1	Dusp28			687	185	248	42	76	38							1	Dusp28		0.787185	0.85274	0.663793					1.88711	2.53374	0.981384
1	5033417F24Rik			8	223											1	5033417F24Rik		0.0386266							-4.63743
1	Rnpepl1	222	113	0	786	256	301	76	273	209	272			86	87	1	Rnpepl1	0.661721	0.00126904	0.45975	0.219373	0.434783		0.497143	0.96801	-9.62022	-0.23278	-1.83125	-0.378512		-0.0164881
1	Capn10	173	237	0	794	339	218	187	229	872	501	144	30	255	60	1	Capn10	0.42233	0.00125628	0.608229	0.449761	0.634909	0.823864	0.807571	-0.451874	-9.63481	0.634604	-0.290901	0.798294	2.22571	2.06926
1	Gpr35	6	117					132	64							1	Gpr35	0.056			0.671717				-4.07529			1.03291
1	Kif1a	335	354			135	138	41	49	122	154			45	33	1	Kif1a	0.486252		0.494545	0.456522	0.442446		0.575	-0.0793578		-0.0314782	-0.251539	-0.33361		0.436099
1	Crocc2	2	107													1	Crocc2	0.027027							-5.16993
1	Sned1			313	249	32	68	26	47	4	185			0	42	1	Sned1		0.556738	0.323529	0.36	0.026178		0.0227273		0.328836	-1.06413	-0.830075	-5.21723		-5.42626
1	Mterf4	152	84	2726	2366	532	260	209	274	869	591	122	88	69	286	1	Mterf4	0.642857	0.535336	0.671285	0.43299	0.595075	0.580189	0.196078	0.847997	0.204255	1.03009	-0.389042	0.555418	0.466781	-2.03562
1	Pask	22	26			249	264	265	227	496	235	67	30	57	115	1	Pask	0.46		0.485437	0.538462	0.678035	0.686869	0.333333	-0.231326		-0.0840643	0.222392	1.07446	1.13327	-1
1	Ppp1r7			45	259					105	39			56	63	1	Ppp1r7		0.150327			0.726027		0.471074		-2.49881			1.40599		-0.16711
1	Hdlbp	3470	3728	1806	1758	1392	1562	926	903	2461	1654	1005	485	1140	874	1	Hdlbp	0.482083	0.50673	0.471245	0.506281	0.598008	0.674263	0.565972	-0.103437	0.038841	-0.166123	0.0362466	0.573	1.0496	0.382944
1	2002-09-01	9146	9603	3527	3241	4347	4353	2440	2953	7897	5898	3443	1741	3608	3575	1	2002-09-01	0.487814	0.521123	0.499655	0.452456	0.572443	0.664096	0.502296	-0.0703368	0.121966	-0.00198947	-0.275198	0.421017	0.983341	0.0132524
1	Farp2	795	825	41	0	11	42			23	241	16	45	38	66	1	Farp2	0.490752	0.976744	0.218182		0.0902256	0.269841	0.367925	-0.0533734	5.39232	-1.8413		-3.3339	-1.4361	-0.780687
1	Stk25	307	924	2	400	183	237	267	168	215	807	53	65	131	361	1	Stk25	0.249797	0.00742574	0.436019	0.613272	0.210938	0.45	0.267206	-1.58652	-7.0625	-0.371256	0.66521	-1.90332	-0.289507	-1.45545
1	Bok	1373	1367			123	54	254	157	736	192	195	133	261	281	1	Bok	0.501094		0.692737	0.617433	0.792473	0.593939	0.481618	0.00631377		1.17284	0.690573	1.93306	0.548621	-0.106128
1	Thap4	347	311	466	102	346	266	194	331	492	1291	203	178	353	532	1	Thap4	0.527273	0.819298	0.565147	0.370019	0.27619	0.532637	0.399098	0.157541	2.18078	0.378096	-0.767709	-1.38995	0.18861	-0.590386
1	Atg4b	367	1461	47	234	502	478	503	422	587	877	225	109	436	576	1	Atg4b	0.201093	0.169611	0.51222	0.543689	0.401091	0.672619	0.430966	-1.99017	-2.29155	0.0705327	0.252766	-0.578405	1.03882	-0.400938
1	Dtymk	1528	1872	971	1703	2023	2621	1857	2111	6501	4120	2858	1353	3456	3361	1	Dtymk	0.449442	0.363229	0.435644	0.46801	0.612068	0.678614	0.506966	-0.292762	-0.809897	-0.373458	-0.184859	0.657889	1.07828	0.0402009
1	Ing5	149	552	301	733	526	1283	587	729	1168	1389	630	413	833	1338	1	Ing5	0.213371	0.291506	0.290999	0.446131	0.456819	0.603828	0.383801	-1.88232	-1.28123	-1.28477	-0.31208	-0.24981	0.608009	-0.683037
1	D2hgdh	23	105			104	124	45	163	66	88			102	46	1	D2hgdh	0.184615		0.456522	0.219048	0.429487		0.686667	-2.14296		-0.251539	-1.83399	-0.409644		1.13191
1	Fam174a	928	873	857	349	490	567	339	315	473	412	94	20	70	311	1	Fam174a	0.515252	0.710265	0.463645	0.518293	0.534386	0.818966	0.185379	0.0880453	1.29362	-0.210168	0.10561	0.198745	2.17754	-2.13566
1	Panct2					300	136									1	Panct2			0.687215							1.13559
1	D1Ertd622e	149	162	82	546	48	24	69	98	47	103	24	24			1	D1Ertd622e	0.479233	0.131746	0.662162	0.414201	0.315789	0.5		-0.119909	-2.72036	0.970854	-0.500074	-1.11548	0
1	Ppip5k2	68	359	789	680	846	595	391	583	1946	596	515	235	1298	613	1	Ppip5k2	0.160839	0.53705	0.586972	0.401639	0.76533	0.68617	0.679038	-2.38333	0.214198	0.50705	-0.575115	1.70545	1.12858	1.08109
1	Gin1	23	120	311	373	141	161	14	43	135	88	100	44	179	145	1	Gin1	0.165517	0.45481	0.467105	0.254237	0.604444	0.691781	0.552147	-2.3339	-0.261492	-0.190103	-1.55254	0.611729	1.16636	0.302029
1	Pam	646	1490	166	2717	167	1216	76	803	424	1879	7	222	46	445	1	Pam	0.302619	0.0578856	0.1213	0.0874007	0.184382	0.034632	0.0953347	-1.20444	-4.02463	-2.8568	-3.38427	-2.1452	-4.8009	-3.24631
1	B230216N24Rik					29	145			0	118					1	B230216N24Rik			0.170455		0.00833333					-2.28293		-6.89482
1	Pign	818	524	316	166	243	178	427	65	758	576	140	39	329	32	1	Pign	0.609375	0.654959	0.576832	0.866397	0.568114	0.779006	0.909091	0.641546	0.924635	0.446922	2.69707	0.395529	1.81762	3.32193
1	2310035C23Rik	85	146	210	659	88	265	101	226	132	276	34	80	211	235	1	2310035C23Rik	0.369099	0.24225	0.250704	0.31003	0.32439	0.301724	0.473214	-0.773408	-1.64522	-1.57955	-1.15412	-1.05846	-1.21057	-0.154723
1	Tnfrsf11a	0	184	666	527					3	53					1	Tnfrsf11a	0.00537634	0.558159			0.0689655			-7.53138	0.337149			-3.75489
1	Zcchc2	72	19			42	77	67	61					31	41	1	Zcchc2	0.784946		0.355372	0.523077			0.432432	1.8679		-0.859137	0.133267			-0.392317
1	Phlpp1	135	350	76	1123	283	304	55	121	201	827			41	26	1	Phlpp1	0.279261	0.0641132	0.482173	0.314607	0.196117		0.608696	-1.36786	-3.86764	-0.102918	-1.12338	-2.03528		0.63743
1	Kdsr	992	1249	146	0	943	953	800	867	1566	1282	633	448	547	707	1	Kdsr	0.442711	0.993243	0.497366	0.479928	0.549825	0.585411	0.436306	-0.332062	7.19967	-0.0152024	-0.115893	0.288484	0.497767	-0.369573
1	Vps4b	225	344	648	1171	246	1035	279	531	832	1210	259	240	400	300	1	Vps4b	0.395797	0.356398	0.192518	0.344828	0.407534	0.518962	0.571225	-0.610274	-0.852682	-2.06844	-0.925999	-0.53981	0.109478	0.413839
1	Serpinb12			0	450											1	Serpinb12		0.00221239							-8.81698
1	Serpinb2	314	344													1	Serpinb2	0.477273							-0.131245
1	Serpinb10			90	956											1	Serpinb10		0.0868321							-3.39458
1	Serpinb8	58	29	0	1010	80	354	124	340	97	299					1	Serpinb8	0.662921	0.000988142	0.18578	0.26824	0.246231			0.975752	-9.98157	-2.13183	-1.44784	-1.61411
1	Dsel	302	451			38	14			212	368					1	Dsel	0.401325		0.722222		0.365979			-0.577005		1.37851		-0.792767
1	9330185C12Rik													137	0	1	9330185C12Rik							0.992806							7.10852
1	Tsn	1629	2091	1037	1411	1270	1807	878	1527	3000	3008	1175	909	2156	1597	1	Tsn	0.437937	0.423673	0.412796	0.365185	0.499334	0.563758	0.574434	-0.360011	-0.443934	-0.508431	-0.797709	-0.00384079	0.36995	0.432759
1	Nifk	1608	490	2386	1932	3708	2785	1383	1582	4223	2862	2364	1294	2677	2505	1	Nifk	0.76619	0.552546	0.571055	0.466464	0.596021	0.646175	0.51659	1.71237	0.304357	0.412835	-0.193817	0.561082	0.868888	0.0957695
1	Clasp1	46	168	47	208	177	118	84	91	190	337	45	23	20	85	1	Clasp1	0.217593	0.18677	0.599327	0.480226	0.361059	0.657143	0.196262	-1.84629	-2.1224	0.580916	-0.114171	-0.823451	0.938599	-2.03395
1	2900060B14Rik					19	55	21	41					49	0	1	2900060B14Rik			0.263158	0.34375			0.980392			-1.48543	-0.932886			5.64386
1	Tfcp2l1			79	408	2950	2585	1654	1231	8530	4575	5934	2739	3605	3389	1	Tfcp2l1		0.163599	0.53296	0.573259	0.650874	0.68415	0.515437		-2.35403	0.190482	0.425829	0.898628	1.11507	0.0891141
1	Gli2	100	166	27	199	1446	1891	635	859	1201	2285	709	266	538	859	1	Gli2	0.376866	0.122807	0.433363	0.425134	0.34461	0.726714	0.385275	-0.725493	-2.8365	-0.386847	-0.43531	-0.927389	1.41098	-0.674051
1	Ralb	3198	2483	2163	2199	1424	2151	1025	1108	1365	1324	384	141	453	234	1	Ralb	0.562907	0.495875	0.398379	0.480562	0.507618	0.73055	0.658926	0.364956	-0.023803	-0.594716	-0.112229	0.0439651	1.43897	0.950032
1	Epb41l5			54	176	423	308	219	318	547	974	41	49	17	27	1	Epb41l5		0.237069	0.578445	0.408163	0.359816	0.456522	0.391304		-1.68625	0.456457	-0.536053	-0.831226	-0.251539	-0.63743
1	Ptpn4					12	42									1	Ptpn4			0.232143							-1.72583
1	Tmem177	56	75	201	0	283	276	176	313	673	417	227	177	110	174	1	Tmem177	0.428571	0.995074	0.506239	0.360489	0.617216	0.561576	0.388112	-0.415037	7.65821	0.036005	-0.827015	0.689246	0.357157	-0.656795
1	Cfap221									0	94					1	Cfap221					0.0104167							-6.56986
1	Dbi	7229	6982	2558	7053	4474	4499	2918	3572	7624	5811	2130	1090	2380	1893	1	Dbi	0.508689	0.266202	0.498607	0.44963	0.567463	0.66139	0.556959	0.0501487	-1.46286	-0.00803732	-0.291662	0.391703	0.965879	0.330131
1	3110009E18Rik							22	32	55	30			101	0	1	3110009E18Rik				0.410714	0.643678		0.990291				-0.520832	0.853159		6.67243
1	Steap3	1219	716	303	1678	196	301	321	9	543	201	137	14	411	317	1	Steap3	0.62984	0.153303	0.39479	0.96988	0.729223	0.901961	0.564384	0.766836	-2.46546	-0.616353	5.00899	1.42925	3.20163	0.373618
1	Insig2	238	352	9	223	111	157	64	61	344	366	75	20	107	107	1	Insig2	0.403716	0.042735	0.414815	0.511811	0.484551	0.783505	0.5	-0.562658	-4.48543	-0.496426	0.0681715	-0.0891837	1.85561	0
1	Ccdc93	835	544	76	566	185	673	57	190	784	893	132	99	25	378	1	Ccdc93	0.605358	0.119565	0.216279	0.232932	0.46754	0.570815	0.0641975	0.617247	-2.88042	-1.85745	-1.71945	-0.187582	0.411426	-3.86561
1	Htr5b			0	414											1	Htr5b		0.00240385							-8.69697
1	Ddx18	1467	932	1958	1404	1243	1539	929	1305	3278	2441	1683	1011	2155	2086	1	Ddx18	0.611412	0.582342	0.446839	0.415921	0.573152	0.624629	0.508131	0.653903	0.479547	-0.307944	-0.489852	0.425193	0.734683	0.0469266
1	Actr3	3356	2691	1023	1010	1508	888	775	596	1818	1278	712	237	531	531	1	Actr3	0.554968	0.503194	0.629274	0.565186	0.587153	0.749737	0.5	0.318494	0.0184327	0.763337	0.378326	0.508129	1.58294	0
1	Slc35f5	119	158			179	120	91	99	160	331	8	36	49	93	1	Slc35f5	0.430108		0.598007	0.479167	0.326572	0.195652	0.347222	-0.405992		0.57299	-0.120294	-1.04412	-2.03953	-0.910733
1	Lypd1	30	136													1	Lypd1	0.184524							-2.14384
1	Nckap5									42	169					1	Nckap5					0.201878							-1.98313
1	Mgat5	512	305	440	502	53	190	175	147	152	1018			63	111	1	Mgat5	0.626374	0.467161	0.220408	0.54321	0.130546		0.363636	0.745427	-0.18978	-1.82254	0.249978	-2.73555		-0.807355
1	Tmem163	75	90	94	9	15	66									1	Tmem163	0.45509	0.904762	0.192771					-0.259867	3.24793	-2.06609
1	Ccnt2	56	134	278	1553	724	465	475	424	893	772	268	159	334	444	1	Ccnt2	0.296875	0.152209	0.608732	0.528302	0.536293	0.62704	0.429487	-1.24393	-2.47765	0.637651	0.163499	0.209806	0.749534	-0.409644
1	Rab3gap1	259	239	10	263	372	359	208	319	273	575	93	149	170	47	1	Rab3gap1	0.52	0.04	0.508868	0.395085	0.322353	0.385246	0.780822	0.115477	-4.58496	0.0511787	-0.614569	-1.07189	-0.67423	1.83289
1	Zranb3	28	21	0	341	295	472	192	336	536	748	324	227	306	378	1	Zranb3	0.568627	0.00291545	0.384915	0.364151	0.417574	0.587703	0.447522	0.398549	-8.41785	-0.676243	-0.804148	-0.480044	0.511406	-0.303959
1	R3hdm1					13	30							23	26	1	R3hdm1			0.311111				0.470588			-1.14684				-0.169925
1	Ubxn4	419	1063	224	992	315	544	238	363	772	1229	243	239	545	478	1	Ubxn4	0.283019	0.184729	0.367015	0.396352	0.385921	0.504132	0.532683	-1.34104	-2.14187	-0.786332	-0.606928	-0.670118	0.0238467	0.188875
1	Mcm6			0	46					27	9877	32	7636	7636	6577	1	Mcm6		0.0208333			0.00282657	0.00430248	0.537249		-5.55459			-8.46265	-7.8544	0.215357
1	Dars	0	182	0	174	0	532	0	327	1	571	0	186	2443	2998	1	Dars	0.00543478	0.00568182	0.00187266	0.00303951	0.00348432	0.00531915	0.449017	-7.5157	-7.45121	-9.05799	-8.35755	-8.15987	-7.54689	-0.295237
1	Cxcr4									104	24					1	Cxcr4					0.807692							2.07039
1	Cd55	6	371			50	343	57	327	135	733	28	122	143	247	1	Cd55	0.0184697		0.129114	0.150259	0.156322	0.190789	0.367347	-5.7318		-2.75384	-2.49957	-2.43217	-2.08453	-0.784271
1	C4bp-ps1									0	92					1	C4bp-ps1					0.0106383							-6.53916
1	Pfkfb2							13	39	12	46			0	40	1	Pfkfb2				0.259259	0.216667		0.0238095				-1.51457	-1.85415		-5.35755
1	Yod1	123	109	1	122	81	14	39	94	125	74			22	36	1	Yod1	0.529915	0.016	0.845361	0.296296	0.626866		0.383333	0.172837	-5.94251	2.45066	-1.24793	0.748461		-0.685891
1	AA986860	5	176			2	290	10	95							1	AA986860	0.0327869		0.0102041	0.102804				-4.88264		-6.59991	-3.12553
1	Mapkapk2	344	593			7	35	153	216	309	258					1	Mapkapk2	0.367412		0.181818	0.415094	0.544815			-0.783867		-2.16993	-0.494765	0.259316
1	Dyrk3	194	288	1270	798	1211	957	705	1214	1705	2390	901	908	893	2109	1	Dyrk3	0.402893	0.61401	0.558525	0.367517	0.416402	0.498067	0.297603	-0.567595	0.669697	0.339292	-0.783216	-0.486996	-0.0111529	-1.2389
1	Eif2d	571	757	1043	1637	1705	1953	1120	994	2476	2061	1084	693	1483	1444	1	Eif2d	0.430075	0.389262	0.46612	0.529773	0.545715	0.609893	0.506658	-0.406183	-0.649814	-0.195813	0.172018	0.26455	0.644687	0.0384216
1	Rassf5	19	36	42	289											1	Rassf5	0.350877	0.129129						-0.887525	-2.75364
1	Ikbke	89	229	35	22	32	32	22	103					73	0	1	Ikbke	0.28125	0.610169	0.5	0.181102			0.986667	-1.35364	0.646363	0	-2.17688			6.20945
1	Srgap2	18	143	236	965	836	1038	278	240	643	855	152	73	192	380	1	Srgap2	0.116564	0.197007	0.446162	0.536538	0.429333	0.674009	0.336237	-2.922	-2.02714	-0.311896	0.211232	-0.41055	1.04793	-0.98119
1	Fam72a	111	42	320	52	105	18	5	74	225	34	102	36	137	36	1	Fam72a	0.722581	0.858289	0.848	0.0740741	0.8659	0.735714	0.788571	1.38109	2.59851	2.47999	-3.64386	2.6909	1.47705	1.89907
1	Rab7b	142	132			0	161	124	225	215	520					1	Rab7b	0.518116		0.00613497	0.356125	0.29308			0.104589		-7.33985	-0.854395	-1.27025
1	Slc26a9							21	85					0	103	1	Slc26a9				0.203704			0.00952381				-1.96683			-6.70044
1	Pm20d1					0	43	75	74	97	104			65	154	1	Pm20d1			0.0222222	0.503311	0.482759		0.298643			-5.45943	0.0191088	-0.0995357		-1.23173
1	Slc41a1	493	963			64	433	69	213	292	1071	118	310	62	364	1	Slc41a1	0.33882		0.130261	0.246479	0.214652	0.276744	0.147196	-0.964522		-2.73918	-1.61218	-1.87133	-1.38595	-2.53447
1	Rab29	435	246			310	171	122	150	460	496	101	79	473	183	1	Rab29	0.63836		0.643892	0.448905	0.481211	0.56044	0.720365	0.819817		0.854506	-0.29589	-0.108479	0.350497	1.36518
1	Nucks1	1167	1333	670	1422	1448	1924	924	1574	3929	3310	1439	944	1271	1920	1	Nucks1	0.466827	0.320439	0.429461	0.37	0.542743	0.603774	0.398371	-0.191718	-1.08455	-0.409801	-0.767827	0.247262	0.607683	-0.594759
1	Slc45a3							41	47	13	57			34	91	1	Slc45a3				0.466667	0.194444		0.275591				-0.192645	-2.05063		-1.39428
1	Elk4	17	118			6	119	0	43	6	181					1	Elk4	0.131387		0.0551181	0.0222222	0.037037			-2.72489		-4.09954	-5.45943	-4.70044
1	Mfsd4a	581	550			137	224	3	41	57	292					1	Mfsd4a	0.51368		0.380165	0.0869565	0.165242			0.0789668		-0.705257	-3.39232	-2.33678
1	Cdk18	647	568	0	732	440	233	119	206	500	240	88	181	107	179	1	Cdk18	0.532457	0.0013624	0.653333	0.366972	0.675202	0.328413	0.375	0.187565	-9.51767	0.91427	-0.786596	1.05578	-1.03206	-0.736966
1	Nuak2	1137	1076			425	927	668	686	1263	1269	56	25	55	40	1	Nuak2	0.51377		0.314623	0.493363	0.498816	0.686747	0.57732	0.0794823		-1.12327	-0.0383039	-0.00683203	1.13245	0.449803
1	Tmcc2	44	81			0	126			0	167			18	34	1	Tmcc2	0.354331		0.0078125		0.00591716		0.351852	-0.865699		-6.98868		-7.39232		-0.881356
1	Dstyk	168	240	14	781	54	135	9	48	120	190	43	72	21	57	1	Dstyk	0.412195	0.0188206	0.287958	0.169492	0.387821	0.376068	0.275	-0.51201	-5.70413	-1.3061	-2.29278	-0.658566	-0.730393	-1.39855
1	6030442K20Rik									14	60	19	27	5	36	1	6030442K20Rik					0.197368	0.416667	0.139535					-2.02385	-0.485427	-2.62449
1	Rbbp5	540	494	249	52	649	837	222	802	1482	1243	900	381	512	1019	1	Rbbp5	0.522201	0.825083	0.436828	0.217349	0.543821	0.70226	0.334638	0.1282	2.23786	-0.366511	-1.84836	0.253532	1.23795	-0.991538
1	Tmem81									77	100					1	Tmem81					0.435754							-0.372809
1	Nfasc			0	435	204	456	96	344	129	258			0	127	1	Nfasc		0.00228833	0.309668	0.219457	0.33419		0.00775194		-8.76818	-1.15657	-1.83054	-0.99444		-7
1	Mdm4	576	756	4070	2325	4057	2936	2180	1866	3257	2109	974	445	1389	1173	1	Mdm4	0.432534	0.636392	0.580129	0.538785	0.60693	0.686137	0.542122	-0.391722	0.807532	0.466426	0.224268	0.626744	1.12836	0.243652
1	Pik3c2b							14	78	78	102			0	45	1	Pik3c2b				0.159574	0.434066		0.0212766				-2.39689	-0.38272		-5.52356
1	Ppp1r15b	924	924	69	3	1439	1223	662	1050	2137	773	616	223	1074	777	1	Ppp1r15b	0.5	0.945946	0.540541	0.386814	0.734203	0.73365	0.58014	0	4.12928	0.234465	-0.664682	1.46586	1.46177	0.466495
1	Plekha6			0	45	13	88	27	98							1	Plekha6		0.0212766	0.135922	0.220472					-5.52356	-2.66838	-1.822
1	Kiss1					0	149	0	92	7	60			10	98	1	Kiss1			0.00662252	0.0106383	0.115942		0.1			-7.22882	-6.53916	-2.93074		-3.16993
1	Ren1									75	75	34	37	151	27	1	Ren1					0.5	0.479452	0.844444					0	-0.118644	2.44057
1	Etnk2									0	52			744	579	1	Etnk2					0.0185185		0.562264					-5.72792		0.361188
1	Sox13			0	280	104	64	43	86	346	785	128	154	608	920	1	Sox13		0.0035461	0.617647	0.335878	0.306267	0.454225	0.398039		-8.13443	0.691878	-0.983512	-1.17959	-0.264897	-0.596759
1	Snrpe	21	20					20	44	37	120			42	20	1	Snrpe	0.511628			0.318182	0.238994		0.671875	0.0671142			-1.09954	-1.67094		1.03395
1	Zc3h11a	194	655	267	879	486	445	256	425	864	1006	335	324	1132	748	1	Zc3h11a	0.229142	0.233449	0.521972	0.376281	0.462073	0.508321	0.602019	-1.75022	-1.71527	0.126878	-0.729085	-0.219292	0.0480215	0.59711
1	Prelp									442	664					1	Prelp					0.399819							-0.586048
1	Fmod	955	76			356	91	185	202	88	0					1	Fmod	0.92546		0.7951	0.478149	0.988889			3.63408		1.95622	-0.126177	6.47573
1	Btg2	1652	893	1106	2424	1584	1442	855	715	601	875	75	96	396	235	1	Btg2	0.648999	0.31342	0.523448	0.544529	0.407307	0.439306	0.627172	0.88674	-1.13133	0.135412	0.257651	-0.541167	-0.351985	0.750352
1	Chit1			126	81	109	148	138	203							1	Chit1		0.607656	0.42471	0.405248					0.631133	-0.437809	-0.553484
1	Chil1	0	103					24	39	4	41					1	Chil1	0.00952381			0.384615	0.106383			-6.70044			-0.678072	-3.07039
1	Ppfia4					17	178	194	413	111	207			0	130	1	Ppfia4			0.0913706	0.320197	0.35		0.00757576			-3.31389	-1.08616	-0.893085		-7.03342
1	Tmem183a	1017	505	636	899	790	795	630	440	1829	1004	755	227	621	615	1	Tmem183a	0.667979	0.414444	0.498425	0.588619	0.645503	0.768293	0.502423	1.00853	-0.498632	-0.00909074	0.516861	0.864648	1.72935	0.0139842
1	Cyb5r1	1368	1994	73	0	941	366	853	148	1381	163	105	41	219	174	1	Cyb5r1	0.406956	0.986667	0.719633	0.851446	0.89392	0.716216	0.556962	-0.543266	6.20945	1.35995	2.51892	3.07499	1.3356	0.330149
1	Adipor1	1721	2103	2821	2793	2452	2593	1556	1815	2448	2400	640	278	895	1064	1	Adipor1	0.450078	0.502493	0.486031	0.461607	0.504948	0.696739	0.45691	-0.28905	0.014386	-0.0806312	-0.221995	0.0285574	1.20006	-0.249283
1	Klhl12	184	213	41	386	489	572	328	376	1133	1019	514	175	272	353	1	Klhl12	0.463659	0.0979021	0.46096	0.466006	0.526462	0.745297	0.435407	-0.210086	-3.20387	-0.225753	-0.196477	0.152851	1.549	-0.374848
1	Rabif	234	439	480	326	252	172	200	139	819	430	189	140	316	156	1	Rabif	0.348148	0.595297	0.593897	0.589443	0.655476	0.574018	0.668776	-0.904843	0.556746	0.548365	0.521769	0.927936	0.430304	1.01372
1	Kdm5b	202	141	405	199	1359	1553	1619	1367	3053	3045	1137	845	1736	2082	1	Kdm5b	0.588406	0.669967	0.466712	0.542169	0.500656	0.573589	0.454712	0.515589	1.02148	-0.19238	0.243926	0.00378412	0.427771	-0.262065
1	Syt2									159	10					1	Syt2					0.935673							3.8625
1	Ppp1r12b	140	254	0	125	156	187	100	104	118	277			37	76	1	Ppp1r12b	0.356061	0.00787402	0.455072	0.490291	0.299748		0.330435	-0.854802	-6.97728	-0.259968	-0.056034	-1.22412		-1.01886
1	Ube2t	670	907	1124	3339	1933	2423	2189	1765	4269	3793	1646	929	1558	1291	1	Ube2t	0.424953	0.25196	0.443782	0.553589	0.529514	0.639115	0.546826	-0.43638	-1.56992	-0.325802	0.310446	0.170516	0.824538	0.271015
1	Lgr6	1224	582	7625	4636	2970	1955	1028	372	79	189			54	0	1	Lgr6	0.677544	0.621871	0.603004	0.733951	0.296296		0.982143	1.07121	0.717735	0.603042	1.464	-1.24793		5.78136
1	Ptprv	106	82	8118	6503	6169	3561	1395	1164	47	8			76	0	1	Ptprv	0.563158	0.555221	0.633991	0.5451	0.842105		0.987179	0.366428	0.319975	0.792583	0.260969	2.41504		6.26679
1	Ptpn7			0	215	13	34									1	Ptpn7		0.00460829	0.285714						-7.75489	-1.32193
1	Arl8a	493	330	261	224	94	233	152	197	259	107	49	43	67	65	1	Arl8a	0.598788	0.537988	0.288754	0.435897	0.706522	0.531915	0.507463	0.57768	0.219642	-1.30051	-0.371969	1.26748	0.184425	0.0430687
1	Elf3			106	43	394	651	427	690	527	405	240	145	444	849	1	Elf3		0.708609	0.377268	0.382484	0.56531	0.622739	0.343629		1.28204	-0.723019	-0.691075	0.379058	0.723065	-0.933658
1	Rnpep	1171	825	145	250	993	441	581	635	1337	232	489	72	426	285	1	Rnpep	0.586587	0.367758	0.692201	0.477833	0.851687	0.870337	0.598878	0.504759	-0.781719	1.1692	-0.128008	2.52168	2.74681	0.578221
1	Timm17a	2300	4061	2147	1479	2573	3703	1855	2487	4691	4068	2118	1214	3943	4461	1	Timm17a	0.361622	0.592062	0.410003	0.427256	0.535555	0.635573	0.469189	-0.819929	0.537397	-0.525072	-0.42279	0.205529	0.802427	-0.178031
1	Lmod1	299	691													1	Lmod1	0.302419							-1.20581
1	Shisa4	226	1640					7	65	24	401					1	Shisa4	0.12152			0.108108	0.058548			-2.85381			-3.04439	-4.0072
1	Ipo9	1483	1808	1812	1325	1785	1835	977	973	2183	2443	892	423	1320	1153	1	Ipo9	0.450653	0.577572	0.493098	0.501025	0.47191	0.678056	0.533737	-0.285701	0.451298	-0.039834	0.00591269	-0.162271	1.0746	0.194987
1	Nav1	413	249	1066	2202	682	745	496	457	571	624	42	40	247	122	1	Nav1	0.623494	0.3263	0.477957	0.520419	0.477861	0.511905	0.668464	0.727703	-1.04591	-0.12729	0.117898	-0.127841	0.0687128	1.01168
1	Csrp1	1641	17639	674	5068	340	3494	189	2318	420	3670	111	731	1924	403	1	Csrp1	0.0851571	0.117514	0.0888947	0.0757274	0.102884	0.132701	0.826535	-3.42532	-2.90874	-3.35745	-3.60943	-3.12428	-2.70834	2.25243
1	Phlda3	7208	8247	2691	1221	2600	4895	1739	1732	3175	2719	1425	684	1354	1252	1	Phlda3	0.466391	0.687787	0.346939	0.501008	0.53867	0.675509	0.519555	-0.194245	1.13943	-0.912537	0.00581565	0.223604	1.0578	0.112906
1	Tnni1	0	64			54	467	53	45	25	52					1	Tnni1	0.0151515		0.105163	0.54	0.329114			-6.02237		-3.08901	0.231326	-1.02748
1	Lad1			5877	4293	4709	5240	1746	2006	1532	2514	319	190	562	704	1	Lad1		0.577861	0.473319	0.46537	0.378706	0.626223	0.444006		0.453003	-0.154115	-0.200161	-0.714201	0.744499	-0.324488
1	Pkp1	26	59	1828	5482	3378	3379	912	1032	231	257					1	Pkp1	0.310345	0.250137	0.499926	0.469168	0.473469			-1.152	-1.58391	-0.000426896	-0.178153	-0.153246
1	Tmem9	815	986	7	699	589	763	585	601	1541	1726	249	173	443	578	1	Tmem9	0.452579	0.0112994	0.435746	0.493266	0.471704	0.589623	0.434018	-0.274481	-6.45121	-0.372858	-0.0388628	-0.163465	0.522841	-0.383004
1	Kif21b					119	274	75	144	0	54					1	Kif21b			0.303797	0.343891	0.0178571					-1.1964	-0.931982	-5.78136
1	5730559C18Rik	60	82	364	111	503	340	272	182	302	480	116	35	59	160	1	5730559C18Rik	0.423611	0.765199	0.59645	0.598684	0.38648	0.764706	0.271493	-0.444302	1.7044	0.563652	0.577057	-0.666719	1.70044	-1.42403
1	Camsap2	167	164			78	366	42	69	158	464			83	139	1	Camsap2	0.504505		0.17713	0.380531	0.254808		0.375	0.0259952		-2.21586	-0.703018	-1.5482		-0.736966
1	9230116N13Rik					30	80							0	41	1	9230116N13Rik			0.276786				0.0232558			-1.38565				-5.39232
1	Ddx59	159	77			171	260	84	151	181	225	87	66	45	63	1	Ddx59	0.672269		0.397229	0.35865	0.446078	0.567742	0.418182	1.03653		-0.601641	-0.838537	-0.312384	0.393342	-0.476438
1	Kif14	113	309	82	1426	379	587	308	533	424	722	122	232	339	175	1	Kif14	0.268868	0.0549669	0.392562	0.366548	0.370209	0.345506	0.658915	-1.44323	-4.10373	-0.629817	-0.789233	-0.766533	-0.921672	0.949959
1	4933409D19Rik													33	14	1	4933409D19Rik							0.693878							1.18057
1	Platr22					47	75	133	386	192	290	24	23	172	421	1	Platr22			0.387097	0.257198	0.39876	0.510204	0.290756			-0.662965	-1.5301	-0.592418	0.0588937	-1.28647
1	Nr5a2			50	2	4	139	3	63	328	538	38	23	58	189	1	Nr5a2		0.944444	0.0344828	0.0588235	0.379032	0.619048	0.236948		4.08746	-4.80735	-4	-0.712198	0.70044	-1.68721
1	Ptprc			1513	2093	12	29	7	46							1	Ptprc		0.419623	0.302326	0.145455					-0.467896	-1.20645	-2.55459
1	Nek7	533	373	220	131	150	444	127	239	477	910	42	183	165	232	1	Nek7	0.588106	0.626062	0.253356	0.347826	0.344132	0.189427	0.41604	0.513801	0.743508	-1.55926	-0.906891	-0.93044	-2.0973	-0.489147
1	Lhx9	113	157	0	69											1	Lhx9	0.419118	0.0140845						-0.470891	-6.12928
1	Dennd1b					62	105	6	39							1	Dennd1b			0.372781	0.148936						-0.750641	-2.51457
1	Zbtb41	164	314			79	57	83	76	64	100			84	47	1	Zbtb41	0.34375		0.57971	0.521739	0.391566		0.639098	-0.932886		0.463947	0.125531	-0.635844		0.824428
1	Aspm	71	145	1192	1957	482	646	255	228	1683	781	411	182	334	594	1	Aspm	0.330275	0.37861	0.427434	0.527835	0.682887	0.692437	0.360215	-1.0199	-0.714787	-0.421743	0.160796	1.10665	1.1708	-0.828729
1	Cfh							30	50							1	Cfh				0.378049							-0.718229
1	Kcnt2									0	287			18	26	1	Kcnt2					0.00346021		0.413043					-8.16993		-0.50696
1	Cdc73	0	40			42	185	17	43	85	179			0	57	1	Cdc73	0.0238095		0.187773	0.290323	0.323308		0.0169492	-5.35755		-2.11289	-1.28951	-1.06559		-5.85798
1	Glrx2	180	574	680	296	188	416	168	246	217	486	104	135	299	653	1	Glrx2	0.239418	0.696319	0.311881	0.40625	0.30922	0.435685	0.314465	-1.66757	1.19719	-1.14166	-0.547488	-1.15959	-0.373217	-1.12433
1	Trove2	720	728	5	1689	593	693	314	292	933	747			190	560	1	Trove2	0.497241	0.00353774	0.46118	0.518092	0.555291		0.253989	-0.0159196	-8.13785	-0.224473	0.104451	0.320384		-1.55443
1	Uchl5	687	530	2008	736	1205	1020	722	777	2292	1344	980	334	892	777	1	Uchl5	0.564397	0.73161	0.541536	0.481679	0.630291	0.745441	0.534411	0.373697	1.44674	0.240247	-0.105775	0.76963	1.55009	0.19889
1	Rgs2	160	131					36	57	88	33					1	Rgs2	0.549488			0.389474	0.723577			0.286523			-0.648528	1.38827
1	Rgs1			1157	606											1	Rgs1		0.656091							0.931867
1	Ptgs2os	31	184													1	Ptgs2os	0.147465							-2.53138
1	Ptgs2	2837	2792			41	26									1	Ptgs2	0.503996		0.608696					0.023059		0.63743
1	BC003331	188	154	244	91	97	76	70	126	194	122	66	31	34	71	1	BC003331	0.549419	0.727003	0.56	0.358586	0.613208	0.676768	0.327103	0.286118	1.41308	0.347923	-0.838938	0.664816	1.06609	-1.04064
1	Tpr	2006	1833	2146	2662	2113	2000	1739	1723	4880	3071	2084	1174	2064	2260	1	Tpr	0.52252	0.446362	0.51373	0.502309	0.613731	0.639571	0.477346	0.130047	-0.31073	0.0792542	0.0133275	0.667999	0.827387	-0.130819
1	Ivns1abp	388	343	214	975	351	524	331	381	1144	1320	293	152	248	80	1	Ivns1abp	0.530696	0.180521	0.401368	0.464986	0.464315	0.657718	0.754545	0.177362	-2.18254	-0.576742	-0.202389	-0.206283	0.942285	1.62015
1	Swt1	460	451	415	1556	577	327	530	534	1160	957	584	230	525	807	1	Swt1	0.504929	0.210846	0.637969	0.498124	0.5479	0.716912	0.394303	0.028444	-1.90411	0.817374	-0.010827	0.27727	1.34054	-0.619292
1	Trmt1l	104	108	88	219	165	108	113	100	118	166	46	29	89	41	1	Trmt1l	0.490654	0.288026	0.603636	0.530233	0.416084	0.61039	0.681818	-0.0539388	-1.30563	0.606855	0.174679	-0.488887	0.647698	1.09954
1	Rnf2	55	39	114	105	291	178	137	95	450	315	133	37	118	141	1	Rnf2	0.583333	0.520362	0.619958	0.589744	0.588005	0.77907	0.455939	0.485427	0.11757	0.706009	0.523562	0.513203	1.81816	-0.254929
1	Fam129a	151	679	518	685	260	469	312	462	181	170	13	27	239	82	1	Fam129a	0.182692	0.430705	0.357045	0.403351	0.515581	0.333333	0.743034	-2.16146	-0.402474	-0.848611	-0.56485	0.0899421	-1	1.53185
1	Edem3	79	88	18	900	183	370	47	154	300	291			145	155	1	Edem3	0.473373	0.0206522	0.331532	0.236453	0.507589		0.483444	-0.153805	-5.56746	-1.01171	-1.69116	0.0437951		-0.0955777
1	1700025G04Rik	31	55			3	258	72	584	99	707	32	135	72	237	1	1700025G04Rik	0.363636		0.0152091	0.110942	0.123762	0.195266	0.234727	-0.807355		-6.01681	-3.00247	-2.82375	-2.04307	-1.70499
1	Tsen15			0	534					7	40					1	Tsen15		0.00186567			0.163265				-9.0634			-2.35755
1	Colgalt2															1	Colgalt2
1	Rgl1	106	57					25	61	51	217					1	Rgl1	0.648485			0.295455	0.192593			0.883486			-1.25376	-2.06774
1	Arpc5	5411	8349	1968	2518	2207	3532	1627	1805	2619	2627	713	503	1052	1671	1	Arpc5	0.393257	0.438725	0.384602	0.474083	0.499238	0.586207	0.386422	-0.625614	-0.355388	-0.678154	-0.149697	-0.00439846	0.5025	-0.667069
1	Ncf2			17	280	49	120	39	40	7	35					1	Ncf2		0.0602007	0.292398	0.493827	0.181818				-3.9645	-1.27501	-0.0356239	-2.16993
1	Smg7	115	189	420	617	209	584	145	271	220	860	51	139	128	273	1	Smg7	0.379085	0.405197	0.264151	0.349282	0.204251	0.270833	0.320099	-0.711875	-0.553787	-1.47805	-0.897638	-1.96197	-1.42884	-1.0868
1	Nmnat2	453	200			170	124	358	228	1235	801	693	407	193	443	1	Nmnat2	0.69313		0.577703	0.610544	0.606477	0.629764	0.304075	1.1755		0.452068	0.648636	0.624005	0.766367	-1.1945
1	Lamc2	80	396	586	553	971	1511	166	1098	1553	1554	81	176	124	408	1	Lamc2	0.169456	0.514461	0.391304	0.131912	0.499839	0.316602	0.234082	-2.29315	0.0834745	-0.63743	-2.71827	-0.000928077	-1.11005	-1.71017
1	Lamc1	298	1693	140	1335	260	1460	178	692	771	2670	317	662	1285	919	1	Lamc1	0.150025	0.0954638	0.151568	0.205275	0.224223	0.324159	0.582956	-2.50222	-3.24415	-2.48483	-1.9529	-1.79071	-1.05998	0.483185
1	E330020D12Rik			0	360	0	60	0	145	10	140	0	74	40	95	1	E330020D12Rik		0.00276243	0.016129	0.00680272	0.0723684	0.0131579	0.29927		-8.49586	-5.93074	-7.18982	-3.68012	-6.22882	-1.22741
1	Shcbp1l					0	106	0	54	2	183					1	Shcbp1l			0.00925926	0.0178571	0.0160428					-6.74147	-5.78136	-5.9386
1	Dhx9	243	301	249	607	242	448	306	472	487	574	161	163	259	214	1	Dhx9	0.446886	0.291375	0.351156	0.39359	0.459078	0.496933	0.547368	-0.307667	-1.28214	-0.885759	-0.623602	-0.236681	-0.017702	0.274175
1	Npl			54	2666	3	271	87	1606	40	777	3	168	252	309	1	Npl		0.0202057	0.0144928	0.0519174	0.0500611	0.0231214	0.449378		-5.59964	-6.08746	-4.19072	-4.24607	-5.40088	-0.293131
1	C230024C17Rik			44	98											1	C230024C17Rik		0.3125							-1.1375
1	Rgs16	561	2793	0	583			71	135	34	50			32	54	1	Rgs16	0.167461	0.0017094		0.346154	0.406977		0.375	-2.31369	-9.18982		-0.917538	-0.543142		-0.736966
1	Rnasel			2	163			17	80							1	Rnasel		0.0179641		0.181818					-5.77259		-2.16993
1	Glul	35	123	0	139	173	1233	262	1126	663	1664	291	566	751	411	1	Glul	0.225	0.0070922	0.12358	0.189209	0.285101	0.33993	0.646048	-1.78427	-7.12928	-2.82618	-2.09935	-1.32627	-0.95738	0.868088
1	A830008E24Rik							19	54	0	67			52	56	1	A830008E24Rik				0.266667	0.0144928		0.481818				-1.45943	-6.08746		-0.10497
1	Cacna1e			0	373											1	Cacna1e		0.00266667							-8.54689
1	Mr1			0	455											1	Mr1		0.00218818							-8.83289
1	Stx6	625	804	4	868	113	194	130	457	546	977	125	92	83	151	1	Stx6	0.437456	0.00572082	0.368932	0.222411	0.358689	0.575342	0.355932	-0.362826	-7.44128	-0.77444	-1.80578	-0.838294	0.438121	-0.85561
1	BC034090	32	27			139	336	54	25	59	133					1	BC034090	0.540984		0.293501	0.679012	0.309278			0.237039		-1.26732	1.08092	-1.1592
1	Xpr1	144	315	0	542	13	101			121	439	35	61	17	24	1	Xpr1	0.314534	0.00183824	0.12069		0.217082	0.367347	0.418605	-1.12387	-9.08481	-2.86507		-1.85062	-0.784271	-0.473931
1	Acbd6	604	432	829	1149	546	541	472	520	1240	1080	455	222	612	518	1	Acbd6	0.582852	0.419192	0.502296	0.475855	0.534453	0.671576	0.541519	0.482568	-0.470451	0.013248	-0.139443	0.199137	1.03199	0.240153
1	Qsox1	1992	4285	18	1492	61	322	121	349	125	446					1	Qsox1	0.317407	0.0125661	0.161039	0.258475	0.219895			-1.10469	-6.29607	-2.38119	-1.52047	-1.82685
1	Cep350	35	67			59	106	20	99	37	471					1	Cep350	0.346154		0.359281	0.173554	0.0745098			-0.917538		-0.834576	-2.25154	-3.63472
1	Tor1aip1	360	281	5	152	226	72	198	74	570	276	180	74	266	109	1	Tor1aip1	0.561431	0.0377358	0.756667	0.726277	0.673349	0.707031	0.708223	0.356304	-4.67243	1.63672	1.40781	1.0436	1.27103	1.27934
1	Tor1aip2	1616	2221	352	809	1518	1685	1129	1154	2099	1814	626	353	825	558	1	Tor1aip2	0.421203	0.303525	0.473947	0.49453	0.536398	0.639144	0.59639	-0.458539	-1.19825	-0.150483	-0.0315701	0.21042	0.824716	0.563293
1	Fam163a									7	126			0	276	1	Fam163a					0.0592593		0.00359712					-3.98868		-8.11374
1	Tdrd5					53	88	27	22	148	191					1	Tdrd5			0.377622	0.54902	0.43695					-0.720846	0.283793	-0.365794
1	Axdnd1							0	52							1	Axdnd1				0.0185185							-5.72792
1	Soat1	3624	5379	0	564	841	860	1950	1334	2731	1778	78	80	155	199	1	Soat1	0.402554	0.00176678	0.494422	0.593731	0.605631	0.49375	0.438202	-0.569625	-9.14211	-0.032193	0.547374	0.618891	-0.0360693	-0.358454
1	Abl2	0	106	52	0	51	885	80	425	190	998	36	323	133	320	1	Abl2	0.00925926	0.981481	0.0554371	0.159763	0.160504	0.102493	0.294505	-6.74147	5.72792	-4.09072	-2.39486	-2.38691	-3.1304	-1.26034
1	Tor3a	701	1063	601	3969	674	1987	826	1100	676	920	234	264	81	585	1	Tor3a	0.397508	0.131671	0.253474	0.428942	0.423655	0.47	0.122754	-0.599955	-2.7213	-1.55836	-0.412855	-0.444045	-0.173332	-2.8372
1	Fam20b	712	2280	977	428	185	2077	389	600	540	1192	12	153	222	247	1	Fam20b	0.238143	0.695096	0.0821555	0.393542	0.311995	0.0778443	0.473461	-1.67769	1.18886	-3.48182	-0.623891	-1.14089	-3.56635	-0.153296
1	Ralgps2			73	166	546	202	411	188	1366	674	210	67	175	139	1	Ralgps2		0.307054	0.729333	0.685524	0.669442	0.756272	0.556962		-1.17425	1.43006	1.12426	1.01805	1.63364	0.330149
1	Rasal2	11	53	158	69	92	173	29	134	115	237			2	139	1	Rasal2	0.181818	0.694323	0.348315	0.181818	0.327684		0.020979	-2.16993	1.1836	-0.903785	-2.16993	-1.03684		-5.54432
1	2810025M15Rik	0	142													1	2810025M15Rik	0.00694444							-7.15987
1	BC026585	55	442	408	91	1011	1260	680	721	761	737	231	88			1	BC026585	0.112224	0.816367	0.445227	0.485388	0.508	0.722741		-2.98381	2.1524	-0.317359	-0.084344	0.0461702	1.38225
1	Sec16b	13	99													1	Sec16b	0.122807							-2.8365
1	Brinp2			23	164											1	Brinp2		0.126984							-2.78136
1	Pappa2					0	143									1	Pappa2			0.00689655							-7.16993
1	Rfwd2	14	49	1	78	13	67	25	130	73	464					1	Rfwd2	0.230769	0.0246914	0.170732	0.165605	0.137291			-1.73697	-5.30378	-2.28011	-2.33298	-2.65163
1	4930523C07Rik			142	131	72	493			1	144					1	4930523C07Rik		0.52	0.128748		0.0136054				0.115477	-2.75854		-6.17991
1	4930562F07Rik			639	1004	153	541	21	122	57	101					1	4930562F07Rik		0.389058	0.221264	0.151724	0.3625				-0.651052	-1.81536	-2.48308	-0.814444
1	Rabgap1l	0	42			22	23									1	Rabgap1l	0.0227273		0.489362					-5.42626		-0.0614005
1	Gas5	0	4998	0	7977	0	5909	0	2798	8	9434	0	2021	6139	10755	1	Gas5	0.0002	0.000125329	0.000169176	0.000357143	0.000952986	0.000494315	0.3634	-12.2874	-12.9618	-12.5289	-11.4507	-10.0339	-10.9816	-0.808831
1	Dars2									4	37	3	72	228	250	1	Dars2					0.116279	0.0519481	0.477083					-2.926	-4.18982	-0.13234
1	Cenpl					0	119	7	92	10	284	0	83	239	157	1	Cenpl			0.00826446	0.0792079	0.0371622	0.0117647	0.603015			-6.90689	-3.53916	-4.69539	-6.39232	0.60311
1	Klhl20	15	40	0	43					36	46			128	17	1	Klhl20	0.280702	0.0222222			0.440476		0.877551	-1.35755	-5.45943			-0.345135		2.8413
1	Prdx6	281	3984	42	58	119	161	284	198	533	4156	232	103	3181	2392	1	Prdx6	0.0660886	0.421569	0.425532	0.588843	0.113835	0.691395	0.570762	-3.82081	-0.456378	-0.432959	0.518193	-2.96063	1.16375	0.411113
1	Suco	0	76	0	40	0	84	0	117	0	282	0	82	4	103	1	Suco	0.0128205	0.0238095	0.0116279	0.00840336	0.00352113	0.0119048	0.0458716	-6.26679	-5.35755	-6.40939	-6.88264	-8.14466	-6.37504	-4.37851
1	Pigc	141	303	128	30	131	219	64	75	40	106					1	Pigc	0.318386	0.80625	0.375	0.460993	0.277027			-1.09818	2.05703	-0.736966	-0.22556	-1.38391
1	Mettl13	428	256			448	130	484	239	876	662	466	333	300	218	1	Mettl13	0.625364		0.774138	0.668966	0.569481	0.583021	0.578846	0.739209		1.77715	1.01495	0.403568	0.483574	0.458833
1	Vamp4	391	316	228	359	154	373	256	200	324	805	163	152	48	297	1	Vamp4	0.552891	0.388795	0.293006	0.561135	0.287356	0.51735	0.14121	0.306371	-0.652649	-1.27077	0.354573	-1.31034	0.100164	-2.60446
1	7420461P10Rik			0	429	174	297	67	32							1	7420461P10Rik		0.00232019	0.369979	0.673267					-8.74819	-0.767957	1.04307
1	Prrc2c	1135	973	1027	1649	1819	1248	1170	887	3220	2418	985	586	1350	1290	1	Prrc2c	0.538389	0.383869	0.593027	0.568723	0.571099	0.626828	0.511355	0.221969	-0.682626	0.543165	0.399109	0.413098	0.748227	0.0655387
1	Prrx1	5751	4645	0	373	193	116	16	37							1	Prrx1	0.553183	0.00266667	0.623794	0.309091				0.308075	-8.54689	0.729548	-1.16046
1	Gorab	729	395	0	202	156	196	104	86	648	178	188	117	254	188	1	Gorab	0.648313	0.00490196	0.443503	0.546875	0.783816	0.615635	0.574324	0.882396	-7.66534	-0.327431	0.271302	1.85826	0.679599	0.432111
1	Kifap3	490	317	47	209	513	320	544	294	797	877	97	35	183	77	1	Kifap3	0.606922	0.186047	0.615569	0.64881	0.476134	0.731343	0.70229	0.626696	-2.12928	0.679195	0.885541	-0.137832	1.44478	1.23816
1	Scyl3	49	41	2	87	43	14	31	92	149	30			38	14	1	Scyl3	0.543478	0.032967	0.745763	0.256	0.828729		0.722222	0.251539	-4.87447	1.55254	-1.53916	2.27462		1.37851
1	BC055324	516	416	315	378	1188	819	760	543	1703	1105	616	369	677	753	1	BC055324	0.553533	0.454676	0.591837	0.583142	0.606406	0.625127	0.473464	0.310117	-0.262273	0.536053	0.48429	0.623574	0.737745	-0.153279
1	Sele	15	74													1	Sele	0.175824							-2.22882
1	Selp	125	787	0	849					0	187					1	Selp	0.137856	0.00117509			0.00529101			-2.64477	-9.73132			-7.55459
1	F5							93	281	8	81					1	F5				0.25	0.0989011						-1.58496	-3.18763
1	Slc19a2	2039	2760	0	93	1948	1672	1486	936	2956	1049	874	466	1344	1645	1	Slc19a2	0.424911	0.0105263	0.5381	0.613449	0.737959	0.652012	0.449682	-0.436622	-6.55459	0.220297	0.666284	1.49374	0.90586	-0.291358
1	Ccdc181					90	108	60	233	576	305	45	29	18	31	1	Ccdc181			0.455	0.20678	0.653454	0.605263	0.372549			-0.26039	-1.93963	0.91504	0.616671	-0.752072
1	Blzf1	43	80	152	234	152	139	78	73	111	136	43	79	73	50	1	Blzf1	0.352	0.39433	0.522184	0.51634	0.449799	0.354839	0.592	-0.880418	-0.619129	0.128105	0.0943274	-0.290677	-0.862496	0.537028
1	Nme7	778	360	274	3166	818	1369	490	453	1220	1777	250	225	303	574	1	Nme7	0.683333	0.0798954	0.374143	0.519577	0.407136	0.526205	0.345848	1.10962	-3.52561	-0.742241	0.113031	-0.542192	0.151365	-0.919491
1	Atp1b1	170	187	66	356	541	632	336	380	1026	606	303	193	275	407	1	Atp1b1	0.476323	0.158019	0.461277	0.469359	0.628519	0.610442	0.403509	-0.136736	-2.41369	-0.223913	-0.177042	0.758668	0.648015	-0.563901
1	Dpt			454	450	38	58	79	119	103	897					1	Dpt		0.502208	0.397959	0.4	0.103792				0.0127391	-0.597241	-0.584963	-3.11013
1	Sft2d2	30	35	95	1	1881	593	551	317	125	67					1	Sft2d2	0.462687	0.979592	0.760097	0.634483	0.649485			-0.215729	5.58496	1.66373	0.795642	0.889817
1	Tiprl	518	458	345	119	479	385	377	193	528	435	272	152	281	410	1	Tiprl	0.530675	0.742489	0.554273	0.660839	0.548187	0.640845	0.406926	0.17724	1.52774	0.314434	0.96233	0.27894	0.835369	-0.543443
1	Gpr161	72	122													1	Gpr161	0.372449							-0.75269
1	Dcaf6	34	63							104	444	24	40	13	113	1	Dcaf6	0.353535				0.190909	0.378788	0.109375	-0.870717				-2.08342	-0.713696	-3.02554
1	Mpzl1	1528	860	1019	960	1677	1606	933	1256	2044	2252	897	502	904	1277	1	Mpzl1	0.639749	0.514891	0.510807	0.426289	0.475803	0.640971	0.414567	0.828503	0.0859608	0.0623728	-0.42849	-0.139746	0.836157	-0.497898
1	Rcsd1					0	106	43	27	131	475	27	80	382	773	1	Rcsd1			0.00925926	0.611111	0.217105	0.256881	0.331029			-6.74147	0.652077	-1.85042	-1.5325	-1.01499
1	Creg1	559	493			265	283	655	827	484	546	197	76	70	22	1	Creg1	0.531309		0.483636	0.442049	0.469961	0.72	0.755319	0.180916		-0.0944647	-0.335935	-0.173556	1.36257	1.62619
1	Pou2f1			274	327	305	380	199	172	702	619	150	32	384	337	1	Pou2f1		0.456053	0.445415	0.536193	0.531368	0.820652	0.532503		-0.254264	-0.316259	0.209228	0.181256	2.19401	0.187835
1	Dusp27					188	105	196	95	1770	326	1019	168	242	50	1	Dusp27			0.640678	0.672355	0.844137	0.857864	0.826531			0.834322	1.03709	2.4372	2.59347	2.25239
1	Gpa33			4924	3942	4352	4101	2044	2800	927	1362	464	282	546	592	1	Gpa33		0.555368	0.514843	0.421998	0.405063	0.621658	0.479825		0.32083	0.0856825	-0.453841	-0.554589	0.716429	-0.116491
1	5330438I03Rik			0	269					47	41					1	5330438I03Rik		0.00369004			0.533333				-8.07682			0.192645
1	Pogk	350	447	11	727	251	423	129	220	577	912	104	91	36	47	1	Pogk	0.439299	0.0162162	0.372781	0.37037	0.387659	0.532995	0.435294	-0.352028	-5.92283	-0.750641	-0.765535	-0.659545	0.190684	-0.375509
1	Fam78b			0	1352	26	148	10	60	41	61					1	Fam78b		0.000738552	0.153409	0.152778	0.403846				-10.4019	-2.46428	-2.47131	-0.561879
1	Uck2	3694	4107	1906	3507	3566	4246	3325	3064	7408	5044	2803	1764	2438	2365	1	Uck2	0.473536	0.35217	0.456488	0.520419	0.594909	0.613701	0.507596	-0.152862	-0.879344	-0.251733	0.117901	0.554425	0.667818	0.0438397
1	Aldh9a1	547	530	1050	388	2147	2342	1722	1680	3395	2418	912	1244	712	2124	1	Aldh9a1	0.507878	0.729861	0.47829	0.506169	0.584007	0.423077	0.251233	0.045464	1.43392	-0.125363	0.035603	0.489426	-0.447459	-1.57549
1	Mgst3	143	277	1488	6045	1599	3547	619	1231	451	583	132	103	134	172	1	Mgst3	0.341232	0.197611	0.3108	0.334773	0.436293	0.561181	0.438312	-0.949016	-2.02164	-1.14893	-0.990662	-0.369646	0.354843	-0.357813
1	Lmx1a			12	929	4	624	0	97	30	901					1	Lmx1a		0.0137858	0.00793651	0.010101	0.0332262				-6.16065	-6.96578	-6.61471	-4.86279
1	Pbx1	657	644			13	233	344	428	2954	2251			13	33	1	Pbx1	0.504988		0.0564516	0.445736	0.567505		0.291667	0.0287884		-4.06301	-0.314381	0.391951		-1.28011
1	Nuf2	1338	992	1339	0	1446	1690	901	1068	3585	3121	839	419	632	890	1	Nuf2	0.574185	0.999254	0.461122	0.457636	0.534586	0.666667	0.415354	0.43129	10.388	-0.224812	-0.245063	0.199905	1	-0.49322
1	Rgs5	82	190													1	Rgs5	0.30292							-1.20239
1	Rgs4	700	672													1	Rgs4	0.510189							0.0588079
1	Hsd17b7	1088	715	967	1302	1531	1266	632	324	1482	655	253	71	440	56	1	Hsd17b7	0.603324	0.426244	0.547338	0.660752	0.693315	0.779141	0.885542	0.604972	-0.428758	0.274	0.961766	1.17675	1.81876	2.95174
1	3110045C21Rik					85	39	24	16	5	87					1	3110045C21Rik			0.68254	0.595238	0.0638298					1.10434	0.556393	-3.87447
1	Ddr2	3375	3695	716	1121	32	35	46	0	814	490	210	24	119	7	1	Ddr2	0.477376	0.389886	0.478261	0.979167	0.624043	0.894068	0.9375	-0.13065	-0.646028	-0.125531	5.55459	0.731077	3.07724	3.90689
1	Uap1	3114	2937	955	1610	1420	1576	814	721	1708	1518	720	466	448	1186	1	Uap1	0.514621	0.372419	0.473983	0.530254	0.52943	0.606902	0.27445	0.0843978	-0.752874	-0.150276	0.174801	0.170031	0.626577	-1.40253
1	Uhmk1	350	560	202	593	308	640	215	215	406	701	293	86	241	101	1	Uhmk1	0.384868	0.254705	0.325263	0.5	0.366997	0.771654	0.703488	-0.67653	-1.54898	-1.05272	0	-0.786442	1.75673	1.24644
1	Olfml2b	1112	2035							90	175					1	Olfml2b	0.353446				0.340824			-0.871284				-0.951637
1	Atf6	1718	2169	2362	1424	1872	1613	1344	1143	2028	1423	700	464	1701	561	1	Atf6	0.442016	0.623812	0.537138	0.540378	0.587605	0.601201	0.751767	-0.336125	0.729658	0.21471	0.233519	0.51082	0.592184	1.59859
1	Dusp12	1037	1501	0	1503	1419	1629	1434	1040	3978	2398	1990	910	1934	1600	1	Dusp12	0.408661	0.000664452	0.465574	0.579564	0.623863	0.686079	0.547229	-0.533078	-10.5546	-0.198981	0.463081	0.729973	1.12797	0.27336
1	Fcrla	8	452	17	820	21	622	5	251	10	842	5	196	12	132	1	Fcrla	0.0194805	0.0214541	0.0341085	0.0232558	0.0128806	0.0295567	0.0890411	-5.65344	-5.51131	-4.82366	-5.39232	-6.25996	-5.03709	-3.35484
1	Fcgr2b			623	729	5	687	774	1293	0	58			13	80	1	Fcgr2b		0.460857	0.00864553	0.374577	0.0166667		0.147368		-0.22635	-6.8413	-0.739569	-5.88264		-2.5325
1	Fcgr3			4235	6295	111	1045	1205	2296	115	698	88	242	9	704	1	Fcgr3		0.402203	0.0967185	0.344276	0.142331	0.268072	0.013986		-0.571733	-3.22331	-0.929521	-2.59117	-1.44908	-6.13955
1	Cfap126	74	1					61	15	48	27					1	Cfap126	0.974026			0.794872	0.636364			5.22882			1.9542	0.807355
1	Sdhc	3041	3589	4535	2003	3500	2892	2567	2634	5005	5234	1941	1124	3332	2036	1	Sdhc	0.458685	0.693578	0.547545	0.493561	0.488819	0.633192	0.62067	-0.238964	1.17854	0.275201	-0.0371578	-0.0645312	0.787618	0.710375
1	Tomm40l	170	403	52	151	151	302	232	143	406	125	181	76	244	142	1	Tomm40l	0.297391	0.258537	0.334066	0.618037	0.763602	0.702703	0.631443	-1.24036	-1.52001	-0.995246	0.694261	1.69161	1.24101	0.776767
1	Apoa2									34	817					1	Apoa2					0.0410317							-4.54667
1	Fcer1g			1406	4696	78	163	842	917							1	Fcer1g		0.230505	0.325103	0.478705					-1.73912	-1.05377	-0.122962
1	Ndufs2	2457	3894	1939	5732	2566	3600	2137	2568	3658	3640	1483	1157	2907	3413	1	Ndufs2	0.386904	0.252835	0.41618	0.454217	0.501233	0.561696	0.459981	-0.664138	-1.56323	-0.488314	-0.264945	0.00711467	0.357856	-0.231436
1	B4galt3	175	376	257	775	574	463	214	228	328	410	76	76	162	283	1	B4galt3	0.318264	0.249516	0.553417	0.484234	0.444595	0.5	0.364653	-1.09899	-1.58869	0.309437	-0.0910109	-0.321051	0	-0.801019
1	Ppox	275	377	1094	799	422	659	287	247	367	553	90	81	274	313	1	Ppox	0.422018	0.577836	0.390582	0.537313	0.399132	0.526012	0.466893	-0.453718	0.452859	-0.641808	0.215729	-0.59018	0.150243	-0.191333
1	Usp21	152	101	0	445	286	293	302	525	846	426	296	111	190	440	1	Usp21	0.6	0.00223714	0.493976	0.365501	0.664835	0.726161	0.302215	0.584963	-8.8009	-0.0347654	-0.795745	0.988126	1.40696	-1.20721
1	Ufc1	354	360	536	774	516	383	324	286	701	510	259	107	169	282	1	Ufc1	0.49581	0.409299	0.573807	0.531046	0.57873	0.706522	0.375276	-0.0241798	-0.529274	0.429058	0.179389	0.458148	1.26748	-0.735267
1	Nit1	622	701	1627	1316	861	752	765	652	1066	1125	380	245	696	679	1	Nit1	0.470189	0.552801	0.533746	0.539817	0.486548	0.607656	0.506173	-0.172239	0.305845	0.195038	0.230261	-0.0776467	0.631133	0.0356239
1	Pfdn2	30	74	295	231	335	365	96	124	793	662	197	132	79	92	1	Pfdn2	0.292453	0.560606	0.478632	0.436937	0.544955	0.598187	0.462428	-1.27462	0.351472	-0.123382	-0.365871	0.26013	0.574074	-0.217231
1	Klhdc9			0	276	36	136	15	35	7	146					1	Klhdc9		0.00359712	0.212644	0.307692	0.0516129				-8.11374	-1.88858	-1.16993	-4.19967
1	Nectin4			4297	2793	1907	2130	809	911	152	342					1	Nectin4		0.606035	0.472394	0.470383	0.308468				0.621333	-0.159469	-0.171112	-1.16468
1	Arhgap30			457	0	44	0	106	0	165	0	68	2	101	14	1	Arhgap30		0.997821	0.978261	0.990741	0.994012	0.958333	0.871795		8.8392	5.49185	6.74147	7.37504	4.52356	2.76553
1	Usf1	2155	1791	6296	2227	5171	4549	6473	2459	9353	5189	4327	1346	3806	2635	1	Usf1	0.546099	0.738651	0.531989	0.724647	0.643152	0.762643	0.590874	0.266787	1.49892	0.184856	1.396	0.849849	1.68395	0.530304
1	Tstd1					148	185	453	176	20	498			81	159	1	Tstd1			0.444776	0.719493	0.0403846		0.338843			-0.31999	1.35894	-4.57058		-0.964376
1	F11r	29	15	1177	1174	328	536	285	329	294	262	44	13	95	142	1	F11r	0.652174	0.500637	0.379908	0.464286	0.528674	0.762712	0.401674	0.906891	0.00367878	-0.706835	-0.206451	0.165652	1.6845	-0.574909
1	B930036N10Rik									185	11	43	0			1	B930036N10Rik					0.939394	0.977778						3.9542	5.45943
1	Alyref2	7	42							132	267			0	105	1	Alyref2	0.156863				0.331671		0.00934579	-2.42626				-1.01081		-6.72792
1	Ly9			0	132											1	Ly9		0.00746269							-7.05528
1	Cd84			110	395			53	83							1	Cd84		0.218935		0.391304					-1.83494		-0.63743
1	Vangl2	42	1	47	0	117	80	244	306	1063	1502	97	65	112	99	1	Vangl2	0.955556	0.979592	0.592965	0.443841	0.414492	0.597561	0.530516	4.42626	5.58496	0.542793	-0.325457	-0.498347	0.570316	0.176323
1	Ncstn	2068	2101	1436	1283	1276	908	612	616	1234	1409	488	106	321	323	1	Ncstn	0.496044	0.528115	0.584172	0.498374	0.466919	0.82047	0.498452	-0.022829	0.162415	0.490406	-0.00938342	-0.191184	2.19222	-0.00893312
1	Copa	6058	4116	2426	3386	2842	2826	2353	1262	3922	2789	1452	577	1583	1675	1	Copa	0.595421	0.417441	0.501411	0.650816	0.584388	0.715411	0.48589	0.557486	-0.480834	0.00814222	0.89826	0.491692	1.32989	-0.0814498
1	Pex19	828	937	128	0	1073	853	1050	1013	1845	746	784	315	1173	970	1	Pex19	0.469157	0.992308	0.557054	0.508959	0.711917	0.712988	0.547319	-0.178216	7.01123	0.330686	0.051705	1.30522	1.31277	0.273889
1	Dcaf8	793	868	965	1826	1539	2067	1247	1526	2693	3161	721	660	845	1000	1	Dcaf8	0.47745	0.345865	0.426829	0.44973	0.460041	0.522054	0.45804	-0.130217	-0.919382	-0.425306	-0.291082	-0.231088	0.127349	-0.242712
1	Pea15a	1528	2198	2138	1217	523	708	476	513	683	1099	100	69	223	277	1	Pea15a	0.410139	0.637176	0.42498	0.481332	0.383408	0.590643	0.446215	-0.524259	0.812422	-0.436219	-0.107779	-0.685435	0.528928	-0.311586
1	Casq1													49	7	1	Casq1							0.862069							2.64386
1	Atp1a2			1	199	143	1281	331	1706	266	1674	14	42	0	362	1	Atp1a2		0.00990099	0.100982	0.162825	0.137487	0.258621	0.00274725		-6.64386	-3.15426	-2.36221	-2.64925	-1.51937	-8.50383
1	Kcnj9									8	78					1	Kcnj9					0.102273							-3.13386
1	Pigm	1331	734	2506	1277	564	302	550	252	1922	1091	605	169	605	163	1	Pigm	0.644412	0.662351	0.650922	0.685323	0.637811	0.780928	0.787013	0.857778	0.972074	0.898933	1.12291	0.816386	1.83378	1.88562
1	Igsf9			575	1150	858	725	378	642	1009	818	172	121	333	235	1	Igsf9		0.333526	0.541956	0.370841	0.552214	0.586441	0.585965		-0.998747	0.242689	-0.762621	0.30242	0.503891	0.501061
1	Tagln2	12119	6708	6292	3453	4618	2598	1919	1217	4089	1248	1193	158	1079	360	1	Tagln2	0.643688	0.645635	0.639928	0.611855	0.766061	0.882483	0.74948	0.85322	0.86548	0.829624	0.656592	1.71133	2.9087	1.58096
1	Apcs			0	321											1	Apcs		0.00309598							-8.33092
1	Aim2			0	109	1235	1630	295	468	453	127			110	155	1	Aim2		0.00900901	0.431113	0.386928	0.780069		0.41573		-6.78136	-0.400078	-0.663991	1.82655		-0.490986
1	Ifi207							190	4							1	Ifi207				0.97449							5.2555
1	Mndal			2	72	0	108									1	Mndal		0.0394737	0.00909091						-4.60486	-6.76818
1	Ifi202b	754	0	318	1					117	4					1	Ifi202b	0.998677	0.993769			0.95935			9.56033	7.31741			4.56071
1	Spta1							24	28	26	21	31	10	223	152	1	Spta1				0.462963	0.55102	0.744186	0.594164				-0.214125	0.295456	1.54057	0.549967
1	Fmn2					28	281	71	231	34	510			100	72	1	Fmn2			0.0932476	0.236842	0.0641026		0.58046			-3.28157	-1.68806	-3.8679		0.468387
1	Grem2	668	3274							201	176					1	Grem2	0.169625				0.532982			-2.29142				0.190606
1	Fh1	4515	4847	4131	6367	5698	4879	3622	3758	6230	5577	3189	1291	2570	2844	1	Fh1	0.482273	0.393524	0.538709	0.490788	0.527648	0.711736	0.474705	-0.102344	-0.624	0.223828	-0.0531641	0.159716	1.30395	-0.146099
1	Opn3	49	356	0	532	170	735	82	137	38	188					1	Opn3	0.12285	0.00187266	0.188534	0.375566	0.171053			-2.83592	-9.05799	-2.10571	-0.733485	-2.27684
1	Chml	25	143	36	81	103	159			148	58			62	61	1	Chml	0.152941	0.310924	0.393939		0.716346		0.504	-2.46949	-1.1481	-0.621488		1.33653		0.0230836
1	Exo1	349	787	671	1622	891	1415	486	1408	1230	1994	664	721	2481	2136	1	Exo1	0.307557	0.29281	0.386482	0.256857	0.381587	0.479452	0.537346	-1.17084	-1.27213	-0.666706	-1.53268	-0.696558	-0.118644	0.215916
1	Cep170	21	326	0	64	0	111			45	321	3	46	48	12	1	Cep170	0.0630372	0.0151515	0.00884956		0.125	0.0784314	0.790323	-3.89372	-6.02237	-6.80735		-2.80735	-3.55459	1.91427
1	Sdccag8	672	1328	0	463	142	306	54	176	86	171			66	1	1	Sdccag8	0.336164	0.00215054	0.317778	0.237069	0.335907		0.971014	-0.981663	-8.85798	-1.10222	-1.68625	-0.983321		5.06609
1	Akt3	0	73	1	262	1	51			20	302	0	40	28	41	1	Akt3	0.0133333	0.00754717	0.037037		0.0648148	0.0238095	0.408451	-6.20945	-7.03892	-4.70044		-3.85086	-5.35755	-0.534336
1	1700016C15Rik	4	78					9	64	0	54	1	39			1	1700016C15Rik	0.0595238			0.133333	0.0178571	0.047619		-3.98185			-2.70044	-5.78136	-4.32193
1	Adss	728	1365	1095	2190	1168	2211	555	1200	1969	2896	784	903	1179	944	1	Adss	0.347971	0.333435	0.345756	0.316448	0.404767	0.464772	0.555294	-0.905967	-0.999342	-0.920076	-1.11108	-0.556364	-0.20363	0.320401
1	Catspere1							0	43							1	Catspere1				0.0222222							-5.45943
1	Desi2	86	71	19	195	103	140	25	34	80	237					1	Desi2	0.54717	0.0925926	0.42449	0.42623	0.253918			0.273018	-3.29278	-0.439112	-0.428843	-1.55497
1	Hnrnpu	260	497	408	1055	273	642	388	638	4144	4858	2437	2161	1800	2906	1	Hnrnpu	0.343874	0.279181	0.2988	0.378405	0.460351	0.53	0.38254	-0.932096	-1.36844	-1.23064	-0.716046	-0.229287	0.173332	-0.690733
1	Efcab2					60	127	33	23	266	195	78	46	23	66	1	Efcab2			0.322751	0.586207	0.576674	0.626984	0.263736			-1.06926	0.5025	0.445986	0.749192	-1.48113
1	Kif26b	132	341	0	370	0	61	7	151	11	678					1	Kif26b	0.28	0.00268817	0.015873	0.05	0.0173661			-1.36257	-8.53528	-5.9542	-4.24793	-5.82231
1	Smyd3	105	314	586	6217	1030	3394	690	2316	1946	4757	264	297	692	959	1	Smyd3	0.251781	0.0862601	0.232942	0.229721	0.29038	0.470693	0.419238	-1.57129	-3.40502	-1.71937	-1.7455	-1.2891	-0.16932	-0.470179
1	Tfb2m	19	273	20	649	57	387	0	266	68	372	5	114	5	134	1	Tfb2m	0.0680272	0.0312966	0.130045	0.00373134	0.156109	0.0495868	0.0425532	-3.7761	-4.95198	-2.74193	-8.0607	-2.43451	-4.26053	-4.49185
1	Cnst	212	692			23	152	78	40	37	35			58	82	1	Cnst	0.235099		0.135593	0.658333	0.513514		0.415493	-1.702		-2.67243	0.946229	0.0780025		-0.492396
1	Sccpdh	269	229	0	143	86	38	121	87	491	588	191	25	47	71	1	Sccpdh	0.54	0.00689655	0.690476	0.580952	0.455134	0.880734	0.4	0.231326	-7.16993	1.15754	0.471306	-0.259609	2.88452	-0.584963
1	Ahctf1	574	760	722	2069	359	1235	571	579	1189	2169	347	416	585	887	1	Ahctf1	0.430389	0.258861	0.225564	0.496528	0.354167	0.454902	0.397558	-0.404334	-1.51756	-1.77961	-0.0200378	-0.866733	-0.26096	-0.599659
1	Cdc42bpa	170	591	139	342	88	131	100	135	269	567	23	56	99	116	1	Cdc42bpa	0.224115	0.289855	0.402715	0.42616	0.322196	0.296296	0.460829	-1.7916	-1.29278	-0.568661	-0.429251	-1.07293	-1.24793	-0.226509
1	Coq8a			75	37	321	146	262	106	195	191	52	114	116	99	1	Coq8a		0.666667	0.686567	0.710811	0.505155	0.315476	0.539171		1	1.13124	1.29745	0.0297473	-1.11757	0.226509
1	Psen2	221	327			223	267	88	50					107	159	1	Psen2	0.403636		0.455285	0.635714			0.402985	-0.563136		-0.258734	0.803308			-0.567041
1	Itpkb			0	78	13	210	19	158	1	63					1	Itpkb		0.0125	0.0622222	0.111732	0.030303				-6.30378	-3.91374	-2.99095	-5
1	Parp1	681	605	3190	4040	4776	4502	3917	3893	5610	4959	1674	1122	2315	2654	1	Parp1	0.529503	0.441233	0.514763	0.501536	0.530792	0.598642	0.465902	0.170454	-0.340704	0.0852184	0.00886451	0.177918	0.576803	-0.197077
1	Lin9	93	127	593	486	295	334	195	299	350	273	93	51	76	273	1	Lin9	0.423423	0.549491	0.469097	0.395161	0.5616	0.643836	0.219373	-0.445411	0.286541	-0.178564	-0.614109	0.357295	0.854149	-1.83125
1	Acbd3	43	185			5	43	23	18	97	105					1	Acbd3	0.191304		0.12	0.55814	0.480392			-2.07973		-2.87447	0.337035	-0.113211
1	H3f3a					4	49	0	111	31	32					1	H3f3a			0.0909091	0.00884956	0.492308					-3.32193	-6.80735	-0.0443941
1	Sde2	158	1346	496	1280	644	2333	420	1943	970	3705	413	1254	1330	1012	1	Sde2	0.105578	0.279528	0.216516	0.178013	0.207612	0.248053	0.567833	-3.08265	-1.36595	-1.85543	-2.20714	-1.93232	-1.59998	0.393876
1	Lefty2			102	3724	3144	10616	2234	7658	3187	10977	1061	2972	4595	3967	1	Lefty2		0.026907	0.228528	0.225894	0.225046	0.263197	0.536665		-5.17652	-1.75524	-1.77688	-1.78389	-1.48514	0.211967
1	Pycr2	2780	2472	3258	3058	4544	4509	3148	2387	6060	2834	2191	1323	3847	3256	1	Pycr2	0.529311	0.515828	0.501933	0.56872	0.681317	0.623436	0.54159	0.169342	0.0913692	0.0111529	0.399091	1.09621	0.727345	0.240565
1	Lefty1			0	74	560	5707	706	6821	970	11924	210	1792	7633	6131	1	Lefty1		0.0131579	0.089488	0.0939036	0.0752947	0.105289	0.554555		-6.22882	-3.34691	-3.27041	-3.61837	-3.08706	0.316081
1	Tmem63a	65	238	72	602	0	56	10	67	0	82					1	Tmem63a	0.216393	0.107988	0.0172414	0.139241	0.0119048			-1.85647	-3.04619	-5.83289	-2.62803	-6.37504
1	2210411M09Rik									11	54					1	2210411M09Rik					0.179104							-2.1964
1	Ephx1	1329	1852	2217	923	930	1057	269	308	137	150	24	48	80	179	1	Ephx1	0.417845	0.70592	0.468074	0.466321	0.477509	0.337838	0.310345	-0.478437	1.26329	-0.184487	-0.194647	-0.12988	-0.970854	-1.152
1	Nvl	43	2	47	0	91	14	69	37	176	12	46	3			1	Nvl	0.93617	0.979592	0.859813	0.648148	0.931579	0.921569		3.87447	5.58496	2.61667	0.881356	3.76717	3.55459
1	Fgfr3-ps	35	15	42	22	385	176	75	25	177	37	49	16			1	Fgfr3-ps	0.692308	0.651515	0.685613	0.745098	0.824074	0.746269		1.16993	0.902703	1.12485	1.54749	2.22781	1.55639
1	Cnih4	134	230	123	100	128	266	111	155	164	216			44	120	1	Cnih4	0.368852	0.551111	0.325758	0.41791	0.431937		0.271084	-0.774933	0.295985	-1.04947	-0.478047	-0.395229		-1.42701
1	Wdr26	254	202	70	3	374	504	230	278	450	436	56	37	105	142	1	Wdr26	0.556769	0.946667	0.426136	0.452941	0.507883	0.6	0.425703	0.329018	4.14975	-0.429393	-0.272372	0.0454942	0.584963	-0.431951
1	Dnah14									87	70			5	37	1	Dnah14					0.553459		0.136364					0.309684		-2.66297
1	Lbr	723	750	1905	1178	1836	2517	1791	1914	3346	2654	788	627	1423	1371	1	Lbr	0.490847	0.617828	0.421814	0.48341	0.557647	0.55681	0.509299	-0.0528232	0.692984	-0.454927	-0.0957738	0.334157	0.329261	0.0536687
1	Enah	734	1505	1643	1184	1444	1194	684	1008	4008	2111	1806	667	1429	1320	1	Enah	0.327979	0.581124	0.547348	0.404368	0.654958	0.730101	0.519811	-1.03491	0.472323	0.274059	-0.55875	0.924633	1.43568	0.114385
1	Srp9	5090	1976	2561	1048	2131	2056	1241	865	3510	998	424	156	1755	937	1	Srp9	0.720289	0.709499	0.508952	0.589184	0.778492	0.730241	0.651819	1.36464	1.28826	0.0516656	0.520226	1.81333	1.4367	0.904633
1	Degs1	1374	2051	799	2162	733	1075	510	611	1295	1499	482	333	741	514	1	Degs1	0.401226	0.269997	0.405525	0.455031	0.463519	0.591187	0.590294	-0.577599	-1.43496	-0.551826	-0.260208	-0.210897	0.532175	0.526847
1	Fbxo28	539	572	644	617	449	733	178	170	902	758	311	111	387	110	1	Fbxo28	0.485175	0.510689	0.380068	0.511429	0.543321	0.735849	0.777555	-0.0855757	0.0616923	-0.705855	0.0659633	0.250626	1.47805	1.8055
1	Trp53bp2	154	139			337	262	159	263	491	398	141	57	45	89	1	Trp53bp2	0.525424		0.562396	0.377358	0.552189	0.71	0.338235	0.146841		0.36196	-0.722466	0.30227	1.29177	-0.968291
1	Capn2	6712	6351	2538	2830	1960	1629	727	634	640	1023			108	60	1	Capn2	0.513816	0.472812	0.546087	0.534116	0.384985		0.641176	0.0797467	-0.157051	0.266718	0.197182	-0.675819		0.837447
1	Capn8			130	0	9	347	88	275	60	456					1	Capn8		0.992424	0.027933	0.243836	0.117761				7.03342	-5.12102	-1.63279	-2.90531
1	Susd4			0	494	130	154	142	288	649	690	6	83			1	Susd4		0.00201613	0.458042	0.331019	0.484713	0.0769231			-8.95128	-0.242701	-1.01505	-0.088246	-3.58496
1	Disp1	378	1184	0	1408	179	476	48	50	107	573	38	79	0	133	1	Disp1	0.242327	0.00070922	0.273973	0.49	0.158358	0.327731	0.00740741	-1.64462	-10.4605	-1.40599	-0.0577155	-2.41002	-1.03653	-7.06609
1	Brox	385	435	646	414	848	474	547	372	1071	343	239	93	298	298	1	Brox	0.469586	0.609228	0.641239	0.595005	0.757062	0.718563	0.5	-0.175727	0.640654	0.837837	0.555	1.63982	1.3523	0
1	Aida	575	345	0	509	256	164	91	134	538	369	255	89	94	70	1	Aida	0.624729	0.00195695	0.609005	0.405286	0.592959	0.739884	0.572289	0.735297	-8.99435	0.639302	-0.553254	0.54276	1.50815	0.420108
1	Mia3	1772	2637	2017	2911	1410	1226	637	596	1712	1689	240	164	436	731	1	Mia3	0.40195	0.409331	0.534875	0.516599	0.503379	0.593596	0.373824	-0.573252	-0.529084	0.201583	0.0958255	0.0195019	0.546567	-0.74421
1	Taf1a	158	187			252	584	228	504	592	588	101	105	284	420	1	Taf1a	0.458213		0.301909	0.311989	0.501692	0.490385	0.403683	-0.241706		-1.2093	-1.14094	0.00976447	-0.0554951	-0.562858
1	Marc1					0	47							0	56	1	Marc1			0.0204082				0.0172414			-5.58496				-5.83289
1	Marc2	555	2907	4254	2430	2658	1977	802	1299	845	1870	432	715	639	1097	1	Marc2	0.160508	0.636404	0.573431	0.381835	0.311373	0.376849	0.368239	-2.38687	0.807609	0.426841	-0.69504	-1.14508	-0.725593	-0.778734
1	Mark1			0	543	8	584	9	48	104	297	12	32	0	58	1	Mark1		0.00183486	0.0151515	0.169492	0.260546	0.282609	0.0166667		-9.08746	-6.02237	-2.29278	-1.50492	-1.34395	-5.88264
1	Rab3gap2			37	10									14	124	1	Rab3gap2		0.77551					0.107143		1.7885					-3.05889
1	Iars2			4	88											1	Iars2		0.0531915							-4.15381
1	Bpnt1			21	84	46	74			25	80					1	Bpnt1		0.205607	0.385246		0.242991				-1.94996	-0.67423		-1.63941
1	Eprs	445	843	798	1197	904	933	464	787	1984	1463	717	525	738	952	1	Eprs	0.345736	0.4001	0.492115	0.371109	0.575529	0.57717	0.436761	-0.920199	-0.58436	-0.0455048	-0.760965	0.439223	0.448921	-0.366902
1	Lyplal1	426	668	755	851	611	704	348	267	912	708	361	122	264	86	1	Lyplal1	0.389599	0.470149	0.464692	0.56564	0.562885	0.746392	0.752841	-0.64777	-0.172467	-0.204092	0.380994	0.364829	1.55733	1.60691
1	A730004F24Rik									0	377					1	A730004F24Rik					0.00263852							-8.56224
1	Tgfb2	1251	2009	0	163					203	510					1	Tgfb2	0.383814	0.00606061			0.285315			-0.682961	-7.35755			-1.32475
1	Rrp15	3099	3188	2596	1340	2569	2449	2557	2179	7075	3634	3776	1460	2887	2626	1	Rrp15	0.492924	0.659472	0.511952	0.53989	0.660629	0.721077	0.523663	-0.0408359	0.953537	0.0689866	0.230688	0.960979	1.37028	0.136655
1	D1Pas1					24	111	73	112	307	192	200	164	227	344	1	D1Pas1			0.182482	0.395722	0.61477	0.54918	0.397906			-2.1635	-0.610726	0.67433	0.284729	-0.597563
1	Gpatch2	190	661	0	994	152	601	209	653	609	883	122	205	156	346	1	Gpatch2	0.223916	0.00100402	0.202649	0.243056	0.4083	0.37386	0.311508	-1.79326	-9.95855	-1.97623	-1.6389	-0.535237	-0.743986	-1.14417
1	Kctd3	296	1275	12	2461	1278	2194	458	1222	1660	2143	818	393	1202	1166	1	Kctd3	0.188811	0.00525253	0.368164	0.272889	0.436531	0.675185	0.507595	-2.10309	-7.56518	-0.779205	-1.41386	-0.368253	1.05567	0.0438321
1	Kcnk2	43	132													1	Kcnk2	0.248588							-1.59585
1	Cenpf	580	508	1320	2457	1855	2076	1080	1702	3429	3211	1009	918	961	1500	1	Cenpf	0.533028	0.349563	0.471904	0.38829	0.516411	0.523587	0.390581	0.190873	-0.895854	-0.162305	-0.655712	0.0947367	0.136219	-0.641815
1	Ptpn14	453	1645	634	3279	1439	4172	270	1195	561	3168	84	344	290	742	1	Ptpn14	0.21619	0.162197	0.256547	0.184731	0.15063	0.197674	0.281431	-1.8582	-2.36887	-1.53502	-2.14185	-2.49539	-2.02106	-1.35234
1	Smyd2	1143	2023	2109	1942	2139	2092	894	1214	1962	1743	316	507	802	877	1	Smyd2	0.361111	0.520602	0.505552	0.424171	0.529539	0.384242	0.477692	-0.823122	0.118957	0.0320385	-0.440997	0.17066	-0.680346	-0.128821
1	Prox1			42	4	42	103	27	53	0	205					1	Prox1		0.895833	0.292517	0.341463	0.00483092				3.10434	-1.27417	-0.947533	-7.6865
1	Rps6kc1	479	1076	0	307	576	939	233	340	281	576	89	169	43	239	1	Rps6kc1	0.308285	0.00323625	0.380356	0.406957	0.328289	0.346154	0.15493	-1.16591	-8.26679	-0.704089	-0.543263	-1.03288	-0.917538	-2.44746
1	Angel2	462	540			423	618	322	314	1199	1307	376	235	285	234	1	Angel2	0.461155		0.40652	0.50627	0.478469	0.615008	0.548944	-0.224616		-0.545875	0.0361823	-0.124328	0.675778	0.283354
1	Vash2	290	221					25	68	2	171					1	Vash2	0.567251			0.273684	0.0171429			0.390459			-1.40808	-5.8413
1	Flvcr1	80	191			16	28	18	111	25	320			11	87	1	Flvcr1	0.296703		0.369565	0.145038	0.074928		0.12	-1.24511		-0.770518	-2.55943	-3.62599		-2.87447
1	Tatdn3					107	196	37	51	44	128	39	23	186	346	1	Tatdn3			0.354098	0.422222	0.258621	0.625	0.350187			-0.867164	-0.452512	-1.51937	0.736966	-0.891897
1	Nsl1	304	75			416	653	255	380	670	501	179	194	427	277	1	Nsl1	0.800525		0.389356	0.401884	0.572038	0.48	0.606232	2.00474		-0.649243	-0.573647	0.418625	-0.115477	0.622526
1	Batf3									49	41	37	43	43	0	1	Batf3					0.543478	0.463415	0.977778					0.251539	-0.211504	5.45943
1	Atf3			0	934	884	1084	282	202	110	177			71	127	1	Atf3		0.00106838	0.449239	0.582305	0.384083		0.36		-9.86882	-0.293946	0.479322	-0.681318		-0.830075
1	D730003I15Rik			0	100											1	D730003I15Rik		0.00980392							-6.65821
1	Nenf	1870	1690	398	550	143	519	136	447	402	610	57	78	228	310	1	Nenf	0.525267	0.42	0.216867	0.234188	0.397436	0.423358	0.424074	0.145933	-0.465664	-1.85244	-1.70932	-0.600393	-0.4458	-0.441567
1	Tmem206	513	438			158	122	169	155	396	384	81	76	98	241	1	Tmem206	0.539349		0.56383	0.521472	0.507673	0.515723	0.290323	0.227547		0.370368	0.123989	0.0442806	0.0907655	-1.28951
1	Ppp2r5a	31	127	132	699	119	199	43	118	132	289	66	30	24	57	1	Ppp2r5a	0.2	0.159664	0.375	0.269939	0.314421	0.683673	0.301205	-2	-2.39593	-0.736966	-1.43539	-1.12463	1.11189	-1.21412
1	9430037O13Rik							0	58	26	132			21	189	1	9430037O13Rik				0.0166667	0.16875		0.103774				-5.88264	-2.30039		-3.11042
1	Dtl	192	248	143	553	2242	1435	877	994	1984	1199	770	352	1504	1078	1	Dtl	0.436652	0.206304	0.609677	0.468767	0.623234	0.685943	0.58243	-0.367545	-1.94382	0.643374	-0.180476	0.726105	1.12706	0.480069
1	Ints7	185	704	2143	1115	1226	1910	841	508	1815	1444	838	485	642	1060	1	Ints7	0.208754	0.657669	0.391013	0.623242	0.556884	0.633208	0.377347	-1.92232	0.941968	-0.639193	0.726155	0.329695	0.787714	-0.722534
1	Lpgat1	521	381	63	0	10	110	7	64	294	213	83	34	136	115	1	Lpgat1	0.577434	0.984615	0.0901639	0.109589	0.579568	0.705882	0.541502	0.450477	6	-3.33498	-3.02237	0.463104	1.26303	0.240051
1	Nek2	137	900	347	247	858	1692	1028	1049	2286	2235	1311	803	836	1292	1	Nek2	0.13282	0.583893	0.336599	0.494949	0.505638	0.620038	0.392958	-2.70686	0.488747	-0.978852	-0.0291463	0.0325362	0.7065	-0.627423
1	Kcnh1			9	1161	0	42			10	197					1	Kcnh1		0.00853242	0.0227273		0.0526316				-6.86047	-5.42626		-4.16993
1	Hhat	1026	578	48	0	0	86			108	60	17	26			1	Hhat	0.639477	0.98	0.0113636		0.641176	0.4		0.826801	5.61471	-6.44294		0.837447	-0.584963
1	Sertad4	258	175							9	304					1	Sertad4	0.595402				0.031746			0.557377				-4.93074
1	Syt14					196	162	48	112	18	176			15	252	1	Syt14			0.547222	0.302469	0.0969388		0.0594796			0.273324	-1.20547	-3.21968		-3.98299
1	Diexf	95	303	0	413	150	260	126	382	188	442	51	88	36	332	1	Diexf	0.24	0.00240964	0.366505	0.24902	0.299051	0.368794	0.1	-1.66297	-8.69349	-0.789501	-1.59252	-1.22892	-0.775294	-3.16993
1	Irf6			5	211	1	197	4	125	0	196					1	Irf6		0.0275229	0.01	0.0381679	0.00505051				-5.14296	-6.62936	-4.65535	-7.62205
1	A130010J15Rik	189	226	1452	1697	1287	1056	823	452	277	71	112	45			1	A130010J15Rik	0.455635	0.461123	0.549254	0.645262	0.794286	0.710692		-0.256693	-0.224802	0.285157	0.863133	1.94902	1.29662
1	Traf3ip3	76	126			119	48	96	144	162	257	104	87			1	Traf3ip3	0.377451		0.710059	0.400826	0.387173	0.544041		-0.721898		1.29218	-0.579996	-0.662499	0.254814
1	Hsd11b1			0	142	0	180	0	187	0	79					1	Hsd11b1		0.00694444	0.00549451	0.00529101	0.0123457				-7.15987	-7.49985	-7.55459	-6.32193
1	Camk1g									89	246					1	Camk1g					0.267062							-1.45651
1	Plxna2									21	115					1	Plxna2					0.15942							-2.39855
1	Cr1l	135	128	108	126	117	127	39	77	149	132	63	33	27	67	1	Cr1l	0.513208	0.461864	0.479675	0.338983	0.530035	0.653061	0.291667	0.0762356	-0.2205	-0.117357	-0.963474	0.173536	0.912537	-1.28011
10	Ppp1r14c					0	43									10	Ppp1r14c			0.0222222							-5.45943
10	Plekhg1			101	2902	1626	1968	686	1092	988	1395	46	132	544	400	10	Plekhg1		0.0339434	0.452447	0.385955	0.414675	0.261111	0.57611		-4.8309	-0.275249	-0.669911	-0.497257	-1.50069	0.442654
10	Mthfd1l	1417	927	2210	2666	2139	3533	1980	2333	3205	2762	572	666	1864	1755	10	Mthfd1l	0.604433	0.45326	0.377159	0.459096	0.537108	0.462097	0.515051	0.611661	-0.270519	-0.723691	-0.236576	0.214539	-0.219152	0.0868828
10	Akap12	3638	4632	3584	4277	7158	6970	5790	5592	6969	7027	2904	2614	3973	5252	10	Akap12	0.439918	0.455933	0.506653	0.508696	0.497928	0.526268	0.430693	-0.348405	-0.254963	0.0383925	0.0501902	-0.0119555	0.151727	-0.40255
10	Zbtb2	41	37			97	142	66	88	271	268	109	57	7	89	10	Zbtb2	0.525		0.406639	0.429487	0.502773	0.654762	0.0816327	0.14439		-0.545161	-0.409644	0.0160005	0.923379	-3.49185
10	Rmnd1	74	298	49	0	138	195	123	270	304	285	32	117	806	453	10	Rmnd1	0.200535	0.980392	0.414925	0.313924	0.516074	0.218543	0.639968	-1.99518	5.64386	-0.495769	-1.12795	0.0927941	-1.83825	0.829876
10	Armt1	254	559	0	428	485	789	483	625	1413	1574	346	496	434	530	10	Armt1	0.312883	0.00232558	0.380878	0.436036	0.473068	0.411137	0.450311	-1.13493	-8.74483	-0.700896	-0.371156	-0.15557	-0.51831	-0.287696
10	Ccdc170									4	73					10	Ccdc170					0.0632911							-3.88753
10	Syne1									7	84					10	Syne1					0.0860215							-3.40939
10	Fbxo5	362	323	984	178	826	733	809	815	1405	1837	520	687	706	759	10	Fbxo5	0.528384	0.84622	0.529789	0.498155	0.433416	0.430935	0.481936	0.163976	2.46016	0.172107	-0.0106472	-0.38654	-0.401125	-0.104289
10	Mtrf1l	49	28			162	193	34	18	341	80	35	21	101	63	10	Mtrf1l	0.632911		0.456583	0.648148	0.808511	0.62069	0.614458	0.785875		-0.251185	0.881356	2.078	0.710493	0.672425
10	Rgs17	73	273													10	Rgs17	0.212644							-1.88858
10	Cnksr3			0	56	6	35			22	180	28	48	76	7	10	Cnksr3		0.0172414	0.162791		0.112745	0.371795	0.905882		-5.83289	-2.36257		-2.97628	-0.756729	3.26679
10	Ulbp1	154	1396	184	1041	6	1082	84	779	138	775	0	43	449	907	10	Ulbp1	0.0998711	0.150774	0.00642202	0.0982659	0.151913	0.0222222	0.33137	-3.17199	-2.49376	-7.27346	-3.19794	-2.48097	-5.45943	-1.01277
10	Lrp11	717	160	0	628	758	954	452	718	518	989	129	85	596	607	10	Lrp11	0.816837	0.0015873	0.442824	0.386519	0.343936	0.601852	0.495436	2.15692	-9.29692	-0.331401	-0.666481	-0.931694	0.596103	-0.0263404
10	Pcmt1	688	1210	513	665	753	837	497	581	1027	1120	219	287	872	746	10	Pcmt1	0.362632	0.435593	0.473618	0.461111	0.478362	0.433071	0.538889	-0.813623	-0.373754	-0.152386	-0.224873	-0.124946	-0.388565	0.224873
10	Nup43	258	301	445	437	672	666	583	598	961	1310	473	458	1095	827	10	Nup43	0.461676	0.504525	0.502239	0.49366	0.423229	0.508039	0.569647	-0.221596	0.0261128	0.0129197	-0.0365876	-0.446559	0.0463929	0.404545
10	Lats1	397	894			408	439	51	310	60	944			19	128	10	Lats1	0.307811		0.481743	0.143251	0.0606362		0.134228	-1.16912		-0.105403	-2.58033	-3.95343		-2.6893
10	Katna1	638	537	825	816	733	1167	615	927	1141	1499	334	412	725	828	10	Katna1	0.542906	0.502739	0.38591	0.398964	0.432248	0.447861	0.466881	0.24821	0.0158057	-0.670188	-0.591194	-0.3934	-0.301981	-0.191403
10	Ginm1	560	455	226	250	339	384	261	203	323	502	56	46	202	124	10	Ginm1	0.551622	0.474895	0.468966	0.562232	0.391778	0.548077	0.618902	0.298967	-0.144995	-0.179324	0.360998	-0.634565	0.278301	0.699552
10	Ppil4	425	198	1112	566	576	732	413	530	826	1533	187	311	1010	1067	10	Ppil4	0.6816	0.6625	0.440458	0.438095	0.350275	0.376	0.486291	1.09808	0.973033	-0.345242	-0.359081	-0.891339	-0.730813	-0.0791286
10	Tab2	580	369	351	48	180	277	150	120	598	530	82	71	451	446	10	Tab2	0.610936	0.877805	0.394336	0.555147	0.530088	0.535484	0.502781	0.651013	2.84472	-0.619095	0.319542	0.173844	0.205114	0.0160479
10	Ust	131	622	129	517	12	651	51	377	65	715			99	131	10	Ust	0.174834	0.200617	0.0195489	0.12093	0.084399		0.431034	-2.23869	-1.99444	-5.64829	-2.8618	-3.43942		-0.400538
10	Sash1	44	986	0	313	0	289	72	236	92	281			91	69	10	Sash1	0.0436047	0.0031746	0.00343643	0.235484	0.248		0.567901	-4.45505	-8.29462	-8.17991	-1.69892	-1.60039		0.394279
10	AC133948.1	0	42							0	289					10	AC133948.1	0.0227273				0.00343643			-5.42626				-8.17991
10	Samd5	82	238							97	186					10	Samd5	0.257764				0.34386			-1.52583				-0.932185
10	Stxbp5			7	111	32	35			89	342					10	Stxbp5		0.0666667	0.478261		0.207852				-3.80735	-0.125531		-1.93021
10	AC122301.3			1	58	13	43									10	AC122301.3		0.0327869	0.241379						-4.88264	-1.65208
10	Rab32	564	640	272	1362	497	283	531	308	307	331					10	Rab32	0.468491	0.16687	0.636829	0.63258	0.48125			-0.182073	-2.31981	0.810255	0.783819	-0.108253
10	Shprh	168	176	0	580	293	341	171	417	326	360	21	19	124	93	10	Shprh	0.488439	0.00171821	0.462264	0.291525	0.475291	0.52381	0.570776	-0.0667261	-9.18239	-0.21818	-1.28109	-0.142708	0.137504	0.411195
10	Fbxo30	584	576	0	203	473	632	330	466	828	516	149	176	680	500	10	Fbxo30	0.503442	0.00487805	0.428184	0.414787	0.615899	0.458716	0.576142	0.0198653	-7.67243	-0.417318	-0.496591	0.681208	-0.238787	0.442844
10	Epm2a									7	62					10	Epm2a					0.112676							-2.97728
10	Utrn	332	81	562	131	283	148	382	168	550	1224	227	282	434	306	10	Utrn	0.80241	0.810072	0.655889	0.693841	0.310248	0.446184	0.586253	2.02183	2.0926	0.930579	1.18032	-1.15266	-0.311768	0.502777
10	Stx11	309	472			0	267	0	116	0	288					10	Stx11	0.395913		0.00371747	0.00847458	0.00344828			-0.609572		-8.06609	-6.87036	-8.17493
10	Sf3b5	1978	3339	1839	5381	2447	3385	1918	3031	3786	4650	1166	1627	3286	3751	10	Sf3b5	0.372062	0.254777	0.419609	0.387598	0.448803	0.417531	0.46697	-0.755076	-1.54844	-0.467978	-0.659915	-0.296486	-0.480296	-0.190888
10	Plagl1	5	577	6	632	0	239	2	80	274	1019	60	33	72	134	10	Plagl1	0.010274	0.0109375	0.00414938	0.0357143	0.212355	0.642105	0.350962	-6.58996	-6.49871	-7.90689	-4.75489	-1.89107	0.843274	-0.886991
10	Ltv1	1088	1157	2353	554	2082	2044	1317	1179	1735	2941	874	836	1343	1998	10	Ltv1	0.484646	0.809213	0.504603	0.527622	0.371099	0.511098	0.402034	-0.0886313	2.08455	0.026562	0.159564	-0.76103	0.0640554	-0.572745
10	Phactr2	145	146			287	166	45	199	214	235			0	117	10	Phactr2	0.498294		0.632967	0.186992	0.476718		0.00840336	-0.00984779		0.786221	-2.12029	-0.13445		-6.88264
10	Fuca2	290	524	0	376	501	204	264	216	291	245	37	20	75	39	10	Fuca2	0.356618	0.0026455	0.710042	0.549793	0.542751	0.644068	0.655172	-0.851298	-8.55842	1.29206	0.288297	0.24731	0.85561	0.925999
10	Pex3	337	160	0	170	453	646	354	413	930	999	362	611	485	598	10	Pex3	0.677355	0.00581395	0.412352	0.461638	0.482134	0.372308	0.447926	1.06996	-7.41785	-0.511073	-0.221812	-0.103147	-0.753562	-0.3016
10	Adat2	202	200	222	689	421	415	232	253	472	335	166	129	290	280	10	Adat2	0.502475	0.24425	0.50358	0.478439	0.584672	0.56229	0.508741	0.0142842	-1.62955	0.0206595	-0.124499	0.493379	0.361336	0.050449
10	Aig1	1125	1311	238	411	570	758	331	850	449	1223			79	115	10	Aig1	0.461854	0.367127	0.429323	0.280642	0.268817		0.408163	-0.220561	-0.785634	-0.410609	-1.35798	-1.44361		-0.536053
10	Hivep2	80	221			11	218	71	341	113	426			37	12	10	Hivep2	0.267327		0.0519481	0.173913	0.210721		0.745098	-1.45457		-4.18982	-2.24793	-1.9052		1.54749
10	Adgrg6	157	101			198	14	45	103	11	102			75	674	10	Adgrg6	0.607692		0.929907	0.306667	0.104348		0.101198	0.631355		3.72973	-1.17688	-3.10154		-3.15082
10	Vta1									43	31					10	Vta1					0.578947							0.459432
10	C330004P14Rik					3	90	34	41	96	143			0	184	10	C330004P14Rik			0.0421053	0.454545	0.40249		0.00537634			-4.50779	-0.263034	-0.570012		-7.53138
10	Txlnb			0	365	17	48	0	73	92	152	10	76	0	62	10	Txlnb		0.0027248	0.268657	0.0133333	0.378049	0.125	0.015625		-8.5157	-1.44478	-6.20945	-0.718229	-2.80735	-5.97728
10	Heca					102	91	33	41	24	127			17	90	10	Heca			0.528205	0.447368	0.163399		0.165138			0.162939	-0.304855	-2.35614		-2.33787
10	Abracl	2392	2959	675	1594	498	866	310	397	412	964	144	193	201	363	10	Abracl	0.447039	0.297666	0.3653	0.438646	0.29971	0.427729	0.35689	-0.306777	-1.23846	-0.796992	-0.355854	-1.22439	-0.420004	-0.849583
10	Reps1			0	124	158	533	32	128	252	240	78	97	474	234	10	Reps1		0.00793651	0.229437	0.203704	0.512146	0.446328	0.669014		-6.96578	-1.74781	-1.96683	0.0701042	-0.310929	1.01527
10	Ccdc28a	0	60	615	347	125	318	94	206	218	459	17	109	207	480	10	Ccdc28a	0.016129	0.639004	0.283146	0.31457	0.322533	0.140625	0.301887	-5.93074	0.823843	-1.34013	-1.12363	-1.0707	-2.61143	-1.20945
10	Nhsl1	218	387	4	1874	492	1031	355	532	577	1306	64	84	84	511	10	Nhsl1	0.360791	0.00265957	0.323279	0.40045	0.306631	0.433333	0.142379	-0.825126	-8.55075	-1.06578	-0.582258	-1.17712	-0.387023	-2.59061
10	Hebp2	721	931	491	965	661	1587	260	585	218	629					10	Hebp2	0.436518	0.337449	0.294222	0.308146	0.257951			-0.368331	-0.973365	-1.26231	-1.16685	-1.52442
10	Arfgef3							3	42					44	53	10	Arfgef3				0.0851064			0.454545				-3.42626			-0.263034
10	Perp	624	217	3922	6243	4289	9715	1589	2951	1575	1762			733	335	10	Perp	0.7414	0.385856	0.306297	0.350066	0.471998		0.685981	1.51953	-0.670513	-1.17938	-0.892666	-0.161765		1.12732
10	Tnfaip3	76	285			68	220			133	282					10	Tnfaip3	0.212121		0.237931		0.321343			-1.89308		-1.67938		-1.07857
10	Ifngr1	1475	1381			536	234	347	309	398	331	49	33			10	Ifngr1	0.516445		0.695596	0.528875	0.545828	0.595238		0.0949351		1.19226	0.166819	0.265206	0.556393
10	Pex7	119	13			1102	371	753	192	1048	197	177	18	713	109	10	Pex7	0.895522		0.747797	0.796199	0.841219	0.903553	0.866505	3.09954		1.56806	1.96596	2.40544	3.22781	2.69842
10	Map3k5									123	133			44	43	10	Map3k5					0.48062		0.505618					-0.111893		0.0324215
10	Map7			0	167											10	Map7		0.00591716							-7.39232
10	Rpl32l	26	41	34	6											10	Rpl32l	0.391304	0.833333						-0.63743	2.32193
10	AC153845.2					60	44	42	179	56	26			80	0	10	AC153845.2			0.575472	0.192825	0.678571		0.987805			0.438884	-2.06559	1.078		6.33985
10	Bclaf1	206	231	480	158	320	315	197	166	552	393	189	144	502	275	10	Bclaf1	0.471526	0.751563	0.503925	0.542466	0.583949	0.567164	0.6457	-0.164494	1.59701	0.0226487	0.245652	0.489084	0.389947	0.86589
10	Pde7b							12	55	0	1249			4	210	10	Pde7b				0.188406	0.000799361		0.0231481				-2.10692	-10.2877		-5.39917
10	Ahi1	72	138			28	40	43	23	84	192					10	Ahi1	0.34434		0.414286	0.647059	0.305755			-0.929117		-0.499571	0.874469	-1.18307
10	Hbs1l	45	170	34	170	37	213	13	95	21	336	19	36	9	105	10	Hbs1l	0.211982	0.169903	0.150794	0.127273	0.0612813	0.350877	0.0862069	-1.89429	-2.28857	-2.49354	-2.77761	-3.93717	-0.887525	-3.40599
10	4930455C13Rik									16	25			31	15	10	4930455C13Rik					0.395349		0.666667					-0.612977		1
10	Platr6							0	127					45	114	10	Platr6				0.00775194			0.285714				-7			-1.32193
10	Sgk1	10	862											482	570	10	Sgk1	0.0125858						0.458254	-6.29379						-0.241468
10	E030030I06Rik					0	60							191	561	10	E030030I06Rik			0.016129				0.254642			-5.93074				-1.54946
10	H60b	36	337	44	357	75	151	14	75	44	164	0	88	178	296	10	H60b	0.0986667	0.111663	0.333333	0.164835	0.214286	0.0111111	0.37605	-3.19143	-2.99196	-1	-2.34104	-1.87447	-6.47573	-0.730503
10	Eya4			0	79					5	100					10	Eya4		0.0123457			0.0560748				-6.32193			-4.07325
10	Slc18b1	91	472			0	102	10	68	290	180	138	118	363	259	10	Slc18b1	0.162832		0.00961538	0.1375	0.616525	0.53876	0.583333	-2.36213		-6.6865	-2.64909	0.685029	0.224123	0.485427
10	Stx7	1288	618	343	175	443	281	620	459	598	349	46	48	280	81	10	Stx7	0.675577	0.661538	0.61157	0.574468	0.631191	0.489583	0.774105	1.05824	0.966833	0.654865	0.432959	0.775201	-0.060121	1.77687
10	Moxd1															10	Moxd1
10	Ctgf	33774	28146	887	635	2851	1426	1375	696	2168	1504	137	86	614	254	10	Ctgf	0.545444	0.582677	0.666511	0.663772	0.590365	0.613333	0.706897	0.262975	0.481533	0.998989	0.98125	0.527267	0.665581	1.27009
10	Enpp1	1012	2417	168	10	4	100									10	Enpp1	0.295249	0.938889	0.0471698					-1.25518	3.94145	-4.33628
10	Enpp3	39	108	0	670	685	1681	1308	3312	2127	2525	124	180	812	903	10	Enpp3	0.268456	0.0014881	0.289696	0.283211	0.457241	0.408497	0.4735	-1.44626	-9.39017	-1.2939	-1.33967	-0.247356	-0.534062	-0.153067
10	Med23	68	47	140	124	228	239	149	205	312	271	97	57	153	174	10	Med23	0.589744	0.530075	0.488273	0.421348	0.535043	0.628205	0.468085	0.523562	0.173767	-0.0676868	-0.457682	0.202556	0.756729	-0.184425
10	Arg1			151	21	90	79	504	226	0	104					10	Arg1		0.873563	0.532164	0.689891	0.00943396				2.7885	0.185867	1.15359	-6.71425
10	Akap7	120	52			163	157	149	248	249	425	24	28	0	79	10	Akap7	0.695402		0.509317	0.37594	0.369822	0.462963	0.0123457	1.19094		0.0537713	-0.731183	-0.768925	-0.214125	-6.32193
10	Epb41l2			97	903	0	76	58	112	3	241			19	111	10	Epb41l2		0.0978044	0.0128205	0.343023	0.0162602		0.151515		-3.20547	-6.26679	-0.937536	-5.91886		-2.48543
10	Tmem200a	554	360							0	115	0	85			10	Tmem200a	0.605895				0.00854701	0.0114943		0.620489				-6.85798	-6.42626
10	Samd3									283	181					10	Samd3					0.609442							0.641952
10	L3mbtl3	86	512	0	60	493	399	216	142	444	942					10	L3mbtl3	0.145	0.016129	0.552573	0.602778	0.320605			-2.55987	-5.93074	0.304511	0.60168	-1.08345
10	Arhgap18	131	181			48	23	130	220	61	148					10	Arhgap18	0.420382		0.671233	0.372159	0.293839			-0.463401		1.02975	-0.75448	-1.26497
10	Lama2	104	168													10	Lama2	0.383212							-0.686634
10	Ptprk	500	1117	277	1439	683	1898	593	1334	1930	5043	89	104	340	982	10	Ptprk	0.30945	0.161816	0.264808	0.307932	0.276846	0.461538	0.257553	-1.15804	-2.37291	-1.47317	-1.1683	-1.38522	-0.222392	-1.52742
10	Soga3					0	54	0	115							10	Soga3			0.0178571	0.00854701						-5.78136	-6.85798
10	AC153912.1					35	108									10	AC153912.1			0.248276							-1.59826
10	9330159F19Rik			0	127	31	183							0	70	10	9330159F19Rik		0.00775194	0.148148				0.0138889		-7	-2.52356				-6.14975
10	Echdc1			33	14	54	47			101	60					10	Echdc1		0.693878	0.533981		0.625767				1.18057	0.196397		0.741688
10	Rnf146	579	732	1175	2207	2029	2149	722	759	1329	954	153	240	564	446	10	Rnf146	0.441736	0.347518	0.485646	0.487525	0.582057	0.389873	0.5583	-0.33776	-0.908852	-0.0828569	-0.0720038	0.477854	-0.646103	0.337976
10	Cenpw	473	681	439	858	1307	883	958	836	1589	1453	326	228	1138	480	10	Cenpw	0.410035	0.338722	0.596715	0.533964	0.522339	0.588129	0.703086	-0.524885	-0.965155	0.565244	0.196303	0.128999	0.513943	1.24366
10	Trmt11	45	97	296	25	151	729	134	327	267	554	86	47	234	202	10	Trmt11	0.319444	0.919505	0.172336	0.291577	0.325638	0.644444	0.53653	-1.09115	3.51388	-2.26383	-1.28074	-1.05025	0.857981	0.211181
10	Hint3					58	26									10	Hint3			0.686047							1.12776
10	Ncoa7	75	98			37	102	51	121	23	254					10	Ncoa7	0.434286		0.269504	0.298851	0.0860215			-0.381429		-1.43857	-1.2303	-3.40939
10	Hddc2	113	191	4	184	108	306	103	165	183	179	31	22	56	104	10	Hddc2	0.372549	0.0263158	0.262019	0.385185	0.505495	0.581818	0.351852	-0.752072	-5.20945	-1.49391	-0.6746	0.0317089	0.476438	-0.881356
10	Tpd52l1	336	90			349	311	359	442	701	1244	244	214	420	628	10	Tpd52l1	0.787383		0.528701	0.448319	0.360555	0.532609	0.400952	1.88881		0.165809	-0.29931	-0.826603	0.188445	-0.57924
10	AC153729.1									12	65					10	AC153729.1					0.164557							-2.34395
10	Rnf217			0	74	0	56			42	219			0	87	10	Rnf217		0.0131579	0.0172414		0.163498		0.011236		-6.22882	-5.83289		-2.35509		-6.45943
10	Rsph4a							49	35	24	173			23	50	10	Rsph4a				0.581395	0.125628		0.32				0.473931	-2.79909		-1.08746
10	Zufsp	189	198			385	737	364	510	670	1047	60	184	369	533	10	Zufsp	0.488432		0.343416	0.416667	0.390343	0.247967	0.409292	-0.066769		-0.93502	-0.485427	-0.643254	-1.60064	-0.529314
10	AC153962.3													0	68	10	AC153962.3							0.0142857							-6.10852
10	Dse	1569	1427			200	342	189	317	535	370	261	102	310	299	10	Dse	0.523682		0.369485	0.374016	0.590959	0.717808	0.509002	0.136769		-0.771013	-0.743027	0.530814	1.34692	0.0519521
10	Tspyl1	784	371	278	537	980	676	311	495	851	530	129	103	265	205	10	Tspyl1	0.678479	0.341493	0.591677	0.386139	0.616052	0.555556	0.563559	1.07739	-0.947341	0.535097	-0.668794	0.682142	0.321928	0.368782
10	Tspyl4	199	88					32	27	222	38	22	21			10	Tspyl4	0.692042			0.540984	0.851145	0.511111		1.16812			0.237039	2.5155	0.0641303
10	Frk	278	241	13	631	34	6	10	106	419	83					10	Frk	0.535509	0.0216718	0.833333	0.0932203	0.833333			0.205258	-5.49643	2.32193	-3.28204	2.32193
10	Hdac2	1062	1165	1573	2529	1380	1453	691	724	2026	2081	571	508	1121	854	10	Hdac2	0.476895	0.383528	0.487125	0.488356	0.493307	0.52914	0.567527	-0.133426	-0.684702	-0.0743139	-0.067209	-0.038624	0.168349	0.392076
10	Marcks	310	203			0	48	53	49	301	93					10	Marcks	0.603883		0.02	0.519231	0.762626			0.608345		-5.61471	0.111031	1.68382
10	5930403N24Rik									241	224	58	94			10	5930403N24Rik					0.518201	0.383117						0.105082	-0.687213
10	Lama4	148	1011	0	308	177	325	63	142	19	372					10	Lama4	0.128338	0.00322581	0.353175	0.309179	0.0508906			-2.76383	-8.27146	-0.872995	-1.15987	-4.2211
10	Tube1	77	201	67	961	635	400	365	446	244	833	41	172	270	745	10	Tube1	0.278571	0.0660194	0.613308	0.450185	0.227062	0.195349	0.26647	-1.37281	-3.82243	0.665425	-0.288431	-1.76727	-2.04231	-1.46088
10	Fyn			141	151	357	822	143	693	60	75			0	151	10	Fyn		0.482993	0.303133	0.171838	0.445255		0.00653595		-0.0981804	-1.20093	-2.26887	-0.31719		-7.24793
10	E130307A14Rik	216	332	442	124	863	461	333	473	203	374	19	87	62	37	10	E130307A14Rik	0.394545	0.77993	0.651584	0.413366	0.352332	0.185185	0.623762	-0.617827	1.82538	0.903138	-0.505039	-0.878321	-2.1375	0.729352
10	Rev3l			59	238	149	369	73	220	329	495			54	151	10	Rev3l		0.200669	0.288462	0.250847	0.399516		0.2657		-1.99398	-1.30256	-1.57845	-0.587874		-1.46657
10	Mfsd4b4	26	153			0	112	51	113					0	44	10	Mfsd4b4	0.149171		0.00877193	0.313253			0.0217391	-2.5119		-6.82018	-1.13245			-5.49185
10	Slc16a10	99	83			31	299	7	35	0	57					10	Slc16a10	0.543478		0.0963855	0.181818	0.0169492			0.251539		-3.22882	-2.16993	-5.85798
10	Rpf2	1405	1311	2981	2535	2507	3615	960	1889	3269	4924	1026	1397	1855	3591	10	Rpf2	0.517292	0.540413	0.409536	0.337075	0.399024	0.423505	0.340675	0.0998289	0.233726	-0.527857	-0.975778	-0.590833	-0.444928	-0.952591
10	Gtf3c6	1680	2635	281	788	1650	1241	907	1061	2501	1817	630	550	1529	1567	10	Gtf3c6	0.389391	0.263305	0.570688	0.460914	0.579167	0.533841	0.493867	-0.649031	-1.48433	0.410675	-0.22602	0.46073	0.195588	-0.0353939
10	Amd1	126	170	157	49	142	68	89	105	252	297			57	117	10	Amd1	0.426174	0.759615	0.674528	0.459184	0.459165		0.329545	-0.429168	1.65992	1.05135	-0.236067	-0.236175		-1.02466
10	Ddo									11	46					10	Ddo					0.20339							-1.96963
10	Mettl24	0	89	268	1530	645	566	24	24	9	98			0	44	10	Mettl24	0.010989	0.149444	0.532564	0.5	0.0917431		0.0217391	-6.49185	-2.5088	0.188185	0	-3.30743		-5.49185
10	Cdc40	258	139	5	335	281	326	160	271	302	394	45	44	311	372	10	Cdc40	0.649123	0.0175439	0.463054	0.371824	0.434097	0.505495	0.455474	0.887525	-5.80735	-0.213595	-0.756546	-0.382535	0.0317089	-0.25763
10	Wasf1	42	46	603	451	610	156	411	146	482	226	174	40	520	323	10	Wasf1	0.477778	0.57197	0.795573	0.73703	0.680282	0.810185	0.616568	-0.128324	0.418226	1.96041	1.48683	1.08933	2.09366	0.68529
10	Fig4	131	501	795	502	1474	1775	540	604	844	793	306	453	508	1165	10	Fig4	0.208202	0.612779	0.453707	0.472077	0.515558	0.403417	0.303881	-1.92715	0.66221	-0.267917	-0.161307	0.0898123	-0.564454	-1.19583
10	Ak9													7	42	10	Ak9							0.156863							-2.42626
10	Zbtb24	370	262			368	315	143	242	119	274	38	35	425	196	10	Zbtb24	0.585174		0.538686	0.372093	0.303797	0.52	0.683788	0.496356		0.223696	-0.754888	-1.1964	0.115477	1.11266
10	Mical1	1046	544	0	458	461	513	313	212	793	349	311	208	402	240	10	Mical1	0.657663	0.00217391	0.473361	0.595825	0.694056	0.598848	0.625776	0.941933	-8.84235	-0.153876	0.559911	1.18178	0.578043	0.741747
10	Smpd2	837	569	89	3	463	661	604	571	967	835	280	147	958	483	10	Smpd2	0.59517	0.957447	0.412078	0.514019	0.536585	0.655012	0.664588	0.555988	4.49185	-0.512706	0.08092	0.211504	0.924973	0.986524
10	Ppil6	1	64					39	126	25	230					10	Ppil6	0.0298507			0.239521	0.101167			-5.02237			-1.66676	-3.15131
10	Cd164	419	311	140	257	683	376	344	294	809	557	168	108	215	143	10	Cd164	0.57377	0.353383	0.644675	0.539062	0.592105	0.607914	0.6	0.428843	-0.871676	0.859432	0.225881	0.537657	0.632695	0.584963
10	5730435O14Rik	0	68													10	5730435O14Rik	0.0142857							-6.10852
10	Cep57l1	94	210	308	790	343	471	414	433	200	610	157	128	317	335	10	Cep57l1	0.310458	0.280909	0.421569	0.48881	0.247537	0.550523	0.486239	-1.15124	-1.35607	-0.456378	-0.0645837	-1.60398	0.292553	-0.0794345
10	BC048559															10	BC048559
10	Sesn1	25	32					59	108					30	27	10	Sesn1	0.440678			0.35503			0.525424	-0.343954			-0.861294			0.146841
10	Armc2									20	76			24	92	10	Armc2					0.214286		0.211864					-1.87447		-1.8953
10	Foxo3	364	454	0	1049	436	1348	463	732	716	1774	65	200	382	190	10	Foxo3	0.445122	0.000951475	0.244681	0.387636	0.287721	0.247191	0.667247	-0.31797	-10.0362	-1.62619	-0.659688	-1.30777	-1.60666	1.00377
10	Afg1l	31	190	480	862	372	592	154	347	141	1223			21	226	10	Afg1l	0.143498	0.357887	0.386128	0.308151	0.103953		0.0883534	-2.57743	-0.843324	-0.668856	-1.16682	-3.10764		-3.36712
10	Snx3	1046	2790	2148	2875	1160	2546	851	2444	1364	6167	348	882	3588	2685	10	Snx3	0.272798	0.427662	0.313107	0.258417	0.181203	0.283279	0.571952	-1.41452	-0.420398	-1.13343	-1.52091	-2.1759	-1.33919	0.418123
10	Ostm1	258	552	0	1505	415	578	620	351	421	440	96	126	393	537	10	Ostm1	0.318966	0.00066357	0.41809	0.638232	0.488992	0.433036	0.422747	-1.09433	-10.5565	-0.47698	0.819018	-0.0635357	-0.388772	-0.449411
10	Sec63	124	191			44	8	13	35	7	40			14	94	10	Sec63	0.394322		0.833333	0.28	0.163265		0.136364	-0.619178		2.32193	-1.36257	-2.35755		-2.66297
10	Pdss2	25	137	207	178	72	249	58	182	109	495			61	164	10	Pdss2	0.158537	0.537468	0.226006	0.243802	0.181518		0.273128	-2.40808	0.216624	-1.77596	-1.63306	-2.17284		-1.41213
10	AC152922.2													0	88	10	AC152922.2							0.0111111							-6.47573
10	Bend3	82	214			296	651	364	417	202	443	120	130	626	288	10	Bend3	0.278523		0.312961	0.466156	0.313756	0.480159	0.684498	-1.37315		-1.13441	-0.195606	-1.12908	-0.11456	1.1174
10	1700021F05Rik	267	592	361	1750	435	1084	431	550	460	1259	220	259	1367	937	10	1700021F05Rik	0.311266	0.17132	0.286654	0.439471	0.267868	0.459459	0.593235	-1.1458	-2.27412	-1.3153	-0.351021	-1.45059	-0.234465	0.544408
10	Cd24a	2197	2127	4968	5663	4811	4830	1940	2003	3161	3445	39	126	300	297	10	Cd24a	0.508091	0.467319	0.499015	0.492015	0.478511	0.239521	0.502504	0.0466932	-0.188866	-0.00568521	-0.0460824	-0.124085	-1.66676	0.0144512
10	F930017D23Rik					5	176									10	F930017D23Rik			0.0327869							-4.88264
10	1700027J07Rik									0	175					10	1700027J07Rik					0.00564972							-7.45943
10	Qrsl1	584	237			423	424	218	350	321	1076	107	223	529	544	10	Qrsl1	0.710814		0.499411	0.384211	0.230164	0.325301	0.493023	1.29748		-0.00339858	-0.68054	-1.74189	-1.05247	-0.0402639
10	Rtn4ip1	34	52	0	2425	621	468	575	521	555	445	144	94	446	656	10	Rtn4ip1	0.397727	0.000412031	0.570119	0.52459	0.55489	0.604167	0.404891	-0.598637	-11.2444	0.407327	0.142019	0.318041	0.610053	-0.555619
10	Crybg1			3191	2240	1679	686	306	223	12	45			47	36	10	Crybg1		0.587521	0.709759	0.578154	0.220339		0.564706		0.510318	1.29008	0.45474	-1.82312		0.375509
10	Atg5													75	16	10	Atg5							0.817204							2.16046
10	Prdm1			1	569	92	186	201	177	293	194	48	53	151	239	10	Prdm1		0.0034965	0.332143	0.531579	0.601227	0.475728	0.387755		-8.15482	-1.00774	0.182478	0.592342	-0.140178	-0.658963
10	Prep	2164	3989	1259	2709	1832	2010	799	1341	1743	3153	716	1055	1195	1194	10	Prep	0.351747	0.31738	0.476847	0.373483	0.356064	0.404399	0.500209	-0.882022	-1.10487	-0.133706	-0.746313	-0.854783	-0.558565	0.00120677
10	Popdc3			0	54	23	46	14	30							10	Popdc3		0.0178571	0.338028	0.326087					-5.78136	-0.969626	-1.04731
10	Bves			0	511									0	179	10	Bves		0.00194932					0.00552486		-9					-7.49185
10	Lin28b					398	429	191	283	506	1194	53	62	154	217	10	Lin28b			0.481303	0.403361	0.297885	0.461538	0.41555			-0.107948	-0.564785	-1.23695	-0.222392	-0.49206
10	AC135669.2									0	105					10	AC135669.2					0.00934579							-6.72792
10	Ascc3	204	188	516	158	183	399	219	370	260	487	21	31	68	121	10	Ascc3	0.520305	0.764793	0.315068	0.37225	0.348465	0.407407	0.361257	0.117238	1.70114	-1.12029	-0.753916	-0.902831	-0.540568	-0.822213
10	Sim1									28	395					10	Sim1					0.0682353							-3.77138
10	Lilr4b			9666	2625			693	830							10	Lilr4b		0.786382		0.455082					1.8802		-0.259913
10	Lilrb4a			10831	1728			765	528							10	Lilrb4a		0.862352		0.591506					2.64729		0.534077
10	Fam162b					0	127							0	43	10	Fam162b			0.00775194				0.0222222			-7				-5.45943
10	Dcbld1	342	118			431	575	192	439	960	1179	151	143	468	996	10	Dcbld1	0.742424		0.428571	0.304897	0.448856	0.513514	0.319918	1.52725		-0.415037	-1.1889	-0.296179	0.0780025	-1.08801
10	Gopc	36	95			25	150			38	124			6	158	10	Gopc	0.278195		0.146893		0.237805		0.0421687	-1.37551		-2.53797		-1.68038		-4.50553
10	Nus1	361	1329	43	272	296	1030	24	485	345	1057	97	310	409	444	10	Nus1	0.213948	0.138801	0.223645	0.0489237	0.246439	0.239609	0.479532	-1.87736	-2.63333	-1.79551	-4.28096	-1.6125	-1.66606	-0.118181
10	Cep85l	29	47	0	239	10	67			9	56					10	Cep85l	0.384615	0.00414938	0.139241		0.149254			-0.678072	-7.90689	-2.62803		-2.51096
10	Mcm9							13	31	538	297			0	58	10	Mcm9				0.304348	0.643967		0.0166667				-1.19265	0.854973		-5.88264
10	Asf1a	136	130	212	103	364	187	213	203	525	454	130	106	289	202	10	Asf1a	0.511194	0.671924	0.660036	0.511962	0.536188	0.55042	0.588235	0.0646091	1.03427	0.957164	0.0690416	0.209196	0.291956	0.514573
10	Fam184a									37	75			0	100	10	Fam184a					0.333333		0.00980392					-1		-6.65821
10	Man1a	177	125	198	511	51	66	36	120	211	339					10	Man1a	0.585526	0.279887	0.436975	0.234177	0.384058			0.498454	-1.36338	-0.365649	-1.70941	-0.68147
10	Tbc1d32					4	40	7	34							10	Tbc1d32			0.108696	0.186047						-3.03562	-2.12928
10	Msl3l2			0	358	57	93			105	75			317	190	10	Msl3l2		0.00277778	0.381579		0.582418		0.624754		-8.48784	-0.696608		0.479993		0.735454
10	Gja1	3306	3247	123	54	973	611	914	951	1970	2324			397	283	10	Gja1	0.5045	0.692737	0.614124	0.490091	0.458799		0.583578	0.0259714	1.17284	0.67039	-0.0571898	-0.238303		0.486878
10	Hsf2	115	257	290	347	673	681	585	536	1627	1072	300	313	756	420	10	Hsf2	0.31016	0.455399	0.49705	0.521817	0.60274	0.489431	0.642615	-1.15325	-0.258068	-0.0170231	0.125979	0.601451	-0.0610011	0.846473
10	Serinc1	3107	2482	239	788	1290	657	717	575	1128	1675	225	261	598	512	10	Serinc1	0.555893	0.233236	0.662391	0.554869	0.402496	0.463115	0.538669	0.323902	-1.71699	0.97233	0.317915	-0.569977	-0.213244	0.223597
10	Gcc2	118	301	1061	270	70	213	109	148	294	282	32	29	33	34	10	Gcc2	0.28266	0.796699	0.249123	0.42471	0.510381	0.52381	0.492754	-1.34359	1.97042	-1.59172	-0.437809	0.0599129	0.137504	-0.0418202
10	Lims1	1734	1828	931	1396	614	993	566	643	1312	1288	108	101	468	746	10	Lims1	0.486813	0.400172	0.382225	0.468208	0.504612	0.516588	0.385691	-0.0761194	-0.58393	-0.692659	-0.183712	0.0266147	0.095759	-0.67152
10	Ranbp2	1096	641	2013	741	962	850	617	741	751	1248	184	260	500	853	10	Ranbp2	0.630822	0.730769	0.530871	0.454412	0.375812	0.414798	0.369742	0.772918	1.44057	0.178377	-0.263812	-0.731969	-0.496525	-0.769425
10	Ccdc138	0	150	0	469	65	507	276	436	163	476	77	137	13	40	10	Ccdc138	0.00657895	0.00212314	0.114983	0.387955	0.25585	0.361111	0.254545	-7.2384	-8.87652	-2.94429	-0.657747	-1.54029	-0.823122	-1.5502
10	Sh3rf3									5	350					10	Sh3rf3					0.0168067							-5.87036
10	2010-09-01	216	267					37	52	347	208			35	249	10	2010-09-01	0.447423			0.417582	0.624776		0.125874	-0.304538			-0.479993	0.735584		-2.79586
10	Sowahc	73	150	0	222	223	170	19	35	116	52					10	Sowahc	0.328889	0.00446429	0.567089	0.357143	0.688235			-1.02895	-7.8009	0.389502	-0.847997	1.14244
10	P4ha1	4050	3539	2957	5780	4716	3118	3294	2950	2930	4947	368	225	914	647	10	P4ha1	0.533658	0.338483	0.601965	0.527538	0.372002	0.620168	0.585413	0.194529	-0.966697	0.596786	0.159075	-0.755453	0.707298	0.497778
10	Mcu	1116	1949	3800	2911	1711	3004	723	1070	1615	1183	68	199	161	479	10	Mcu	0.3642	0.566215	0.362943	0.403343	0.577143	0.256506	0.252336	-0.803845	0.384369	-0.811682	-0.564897	0.448758	-1.53533	-1.56704
10	Micu1	2148	4529	11118	17516	5448	7086	3109	2840	2373	3823	171	336	302	585	10	Micu1	0.321755	0.388287	0.434668	0.522601	0.383027	0.337917	0.340832	-1.07585	-0.655729	-0.379184	0.130516	-0.687763	-0.97034	-0.951583
10	Dnajb12	253	411	200	1374	450	590	515	449	242	539	49	85	222	355	10	Dnajb12	0.381381	0.127538	0.432821	0.534161	0.310345	0.367647	0.385147	-0.697816	-2.77416	-0.390031	0.197446	-1.152	-0.782409	-0.674834
10	Ddit4	71	397	162	240	313	1392	612	3013	300	2840	41	266	81	1024	10	Ddit4	0.153191	0.403465	0.183948	0.16901	0.0957989	0.135922	0.0740741	-2.4667	-0.564161	-2.14936	-2.29772	-3.23856	-2.66838	-3.64386
10	Anapc16	829	907	1597	566	829	1330	713	839	1132	773	426	155	695	536	10	Anapc16	0.47756	0.738106	0.384081	0.459459	0.594127	0.732419	0.564477	-0.129581	1.49485	-0.681327	-0.234465	0.549742	1.45269	0.374165
10	Ascc1	296	164	637	1663	552	1063	356	369	382	258	96	47	412	404	10	Ascc1	0.642857	0.27715	0.341991	0.491059	0.596573	0.668966	0.50489	0.847997	-1.38303	-0.944147	-0.0516012	0.564392	1.01495	0.0282199
10	Chst3					0	56			0	153					10	Chst3			0.0172414		0.00645161					-5.83289		-7.26679
10	Psap	15713	20889	9414	9114	8172	6986	7331	7360	10009	7376	2635	1684	3639	3419	10	Psap	0.429297	0.508095	0.539116	0.499013	0.575717	0.610044	0.515581	-0.410762	0.0467184	0.226193	-0.00569499	0.440336	0.645602	0.0899421
10	Vsir			1733	1621	137	224	254	167							10	Vsir		0.516687	0.380165	0.602837					0.0963301	-0.705257	0.602036
10	Slc29a3	460	932	0	106	1095	667	253	89	94	54					10	Slc29a3	0.330703	0.00925926	0.621315	0.738372	0.633333			-1.01711	-6.74147	0.714328	1.49683	0.788496
10	Unc5b	1790	2082			124	87	181	135	870	662			0	80	10	Unc5b	0.462313		0.586854	0.572327	0.567797		0.0121951	-0.217898		0.506353	0.420332	0.393664		-6.33985
10	Pcbd1			0	328	33	119	58	122	82	98			48	187	10	Pcbd1		0.0030303	0.220779	0.324176	0.456044		0.206751		-8.36194	-1.81943	-1.05987	-0.254317		-1.93988
10	Sgpl1	1369	1250	530	579	379	532	710	664	1191	909	327	227	326	385	10	Sgpl1	0.522701	0.477948	0.41621	0.516715	0.567079	0.589928	0.458626	0.131094	-0.127341	-0.488136	0.0964952	0.389446	0.524662	-0.23931
10	Adamts14	336	576					45	92					274	118	10	Adamts14	0.368709			0.330935			0.69797	-0.775823			-1.0156			1.20847
10	Pald1	0	140	0	1452	2370	1926	2488	1852	3477	1285	891	424	1682	2277	10	Pald1	0.00704225	0.000687758	0.551652	0.573238	0.730059	0.677297	0.424893	-7.13955	-10.5048	0.299139	0.425703	1.43537	1.06958	-0.436733
10	Nodal					1327	1197	1568	1409	1922	1480	520	444	1930	1317	10	Nodal			0.525732	0.526687	0.564924	0.539337	0.594337			0.148627	0.15415	0.376787	0.227478	0.550998
10	Eif4ebp2	271	249	175	1843	1053	318	559	318	882	1024	246	142	320	515	10	Eif4ebp2	0.521073	0.0871287	0.767662	0.637088	0.462788	0.633333	0.383513	0.121679	-3.38919	1.72425	0.81187	-0.215139	0.788496	-0.684798
10	Ppa1	135	227	3	51	205	174	196	242	250	291	56	68	235	144	10	Ppa1	0.373626	0.0714286	0.540682	0.447727	0.462247	0.452381	0.619423	-0.745427	-3.70044	0.235289	-0.302761	-0.218281	-0.275634	0.702734
10	Sar1a	9377	9001	4386	3105	3497	3719	2085	2104	3770	3219	865	757	1863	2424	10	Sar1a	0.510229	0.58548	0.484622	0.497733	0.539408	0.533251	0.4346	0.0590347	0.498177	-0.0887723	-0.0130811	0.227886	0.192169	-0.379583
10	Tysnd1	472	419	219	1158	323	286	245	321	400	384	68	133	165	317	10	Tysnd1	0.529675	0.159536	0.530278	0.433099	0.510178	0.339901	0.342975	0.171451	-2.39731	0.174943	-0.388402	0.0587438	-0.957565	-0.937844
10	Aifm2	29	197					7	89	109	32	32	21	58	46	10	Aifm2	0.131579			0.0816327	0.769231	0.6	0.556604	-2.72247			-3.49185	1.73697	0.584963	0.328054
10	H2afy2	548	307			39	98	119	142	992	764	94	30	65	130	10	H2afy2	0.640607		0.28777	0.456274	0.564846	0.753968	0.335025	0.833876		-1.30743	-0.252981	0.376334	1.61566	-0.989029
10	Col13a1					10	196	1	106	10	139	12	79	22	189	10	Col13a1			0.0528846	0.0183486	0.0728477	0.139785	0.107981			-4.16262	-5.74147	-3.66985	-2.62149	-3.04629
10	Fam241b			446	1722	386	1031	115	253	278	242	70	41	130	118	10	Fam241b		0.205991	0.272727	0.313514	0.534483	0.628319	0.524		-1.94658	-1.41504	-1.1307	0.199309	0.75743	0.138605
10	Tspan15			863	1583	543	559	874	417	451	356	133	218	5	538	10	Tspan15		0.352941	0.492754	0.676721	0.558714	0.379603	0.0110092		-0.874469	-0.0418202	1.06578	0.340399	-0.708698	-6.48918
10	Hk1	1098	1157	1405	1637	1843	1110	1049	800	702	804	66	125	398	329	10	Hk1	0.48693	0.461892	0.624027	0.567261	0.46618	0.34715	0.547325	-0.0754439	-0.220339	0.73098	0.390515	-0.195464	-0.911191	0.273923
10	Hk1os													0	41	10	Hk1os							0.0232558							-5.39232
10	Hkdc1									0	88					10	Hkdc1					0.0111111							-6.47573
10	Supv3l1	186	288	1373	502	638	525	326	466	569	692	211	244	412	411	10	Supv3l1	0.392857	0.732019	0.548498	0.411839	0.451306	0.463895	0.500606	-0.628031	1.44975	0.280753	-0.514132	-0.281893	-0.208717	0.00349744
10	Vps26a	633	474	1492	539	1163	1218	609	472	1366	1735	250	367	548	948	10	Vps26a	0.571686	0.734383	0.48846	0.56325	0.440541	0.405493	0.366489	0.416555	1.46718	-0.0666071	0.366969	-0.344754	-0.552018	-0.789602
10	Srgn			1018	340	0	55	138	334	174	91	36	43			10	Srgn		0.749265	0.0175439	0.293249	0.655431	0.45679			1.57931	-5.80735	-1.26908	0.927649	-0.249978
10	Kif1bp	101	52			44	127	25	43	127	175	41	16	44	22	10	Kif1bp	0.658065		0.260116	0.371429	0.421053	0.711864	0.661765	0.944505		-1.50815	-0.758992	-0.459432	1.30485	0.968291
10	Ddx21	2802	2903	2770	4707	3812	3928	2829	2767	6065	5607	2196	1817	4197	3207	10	Ddx21	0.491151	0.370504	0.492508	0.505538	0.519616	0.547198	0.566838	-0.0510697	-0.764708	-0.0432356	0.0319581	0.113259	0.273183	0.388028
10	Ddx50	596	541	283	559	483	480	317	267	493	639	110	171	394	268	10	Ddx50	0.524144	0.336493	0.501554	0.542662	0.435626	0.392226	0.59488	0.139438	-0.979536	0.00897015	0.246794	-0.373561	-0.631849	0.554246
10	Ccar1	54	305	45	0	348	233	93	185	227	512	83	52	269	258	10	Ccar1	0.152355	0.978723	0.598628	0.335714	0.307692	0.613139	0.510397	-2.47603	5.52356	0.576719	-0.98457	-1.16993	0.664397	0.0600073
10	AC122539.3	42	7							29	126			26	26	10	AC122539.3	0.843137				0.191083		0.5	2.42626				-2.08179		0
10	Tet1			81	140	1279	1009	1001	1306	2330	2183	747	746	2127	2437	10	Tet1		0.367713	0.558952	0.433954	0.516279	0.500334	0.466053		-0.781999	0.341789	-0.383377	0.0939761	0.00193003	-0.1962
10	Slc25a16	79	163			36	165	63	169	62	204			16	80	10	Slc25a16	0.327869		0.182266	0.273504	0.235075		0.173469	-1.03562		-2.16559	-1.40939	-1.7022		-2.25239
10	Dna2	160	235	57	679	1079	917	294	619	1197	1952	425	1038	955	2045	10	Dna2	0.405542	0.0785908	0.540541	0.322404	0.380197	0.290785	0.318454	-0.551726	-3.55141	0.234465	-1.07155	-0.705064	-1.28627	-1.09772
10	Rufy2	19	21	2	55	91	78			172	224			35	73	10	Rufy2	0.47619	0.0508475	0.538012		0.434673		0.327273	-0.137504	-4.22239	0.219781		-0.379153		-1.03953
10	Hnrnph3	477	164	107	104	367	466	661	703	1452	1542	174	248	587	432	10	Hnrnph3	0.74339	0.507042	0.440719	0.484627	0.48498	0.412736	0.575906	1.53454	0.040642	-0.343717	-0.0887442	-0.0867034	-0.508791	0.441449
10	Pbld2			9	260	49	40	22	114	33	49					10	Pbld2		0.0369004	0.549451	0.166667	0.404762				-4.70598	0.286304	-2.32193	-0.556393
10	Mypn							45	394	99	51			83	199	10	Mypn				0.104308	0.657895		0.295775				-3.10215	0.943416		-1.25154
10	Herc4					82	63			11	108					10	Herc4			0.564626		0.0991736					0.375039		-3.18322
10	Sirt1			78	5			3	37	9	98					10	Sirt1		0.929412		0.0952381	0.0917431				3.71882		-3.24793	-3.30743
10	Dnajc12	337	250					73	51	139	522			151	102	10	Dnajc12	0.573854			0.587302	0.211161		0.596078	0.429336			0.509014	-1.90138		0.561427
10	Ctnna3									8	59					10	Ctnna3					0.130435							-2.73697
10	Reep3	876	489	1309	311	1226	726	356	158	290	530	125	121	138	184	10	Reep3	0.641551	0.807645	0.627943	0.69186	0.354015	0.508065	0.429012	0.839795	2.06995	0.755108	1.1669	-0.867693	0.0465426	-0.41244
10	Jmjd1c	107	108	1316	472	1033	1233	530	773	803	1025	98	123	220	276	10	Jmjd1c	0.497696	0.735754	0.455908	0.406897	0.439344	0.443946	0.443775	-0.0132968	1.47734	-0.255106	-0.543622	-0.351763	-0.32484	-0.32584
10	Nrbf2	294	175	0	273	204	154	166	100	262	112	34	36	348	107	10	Nrbf2	0.626327	0.00363636	0.569444	0.623134	0.699468	0.486111	0.763676	0.74514	-8.09803	0.403356	0.725493	1.21874	-0.0801703	1.6922
10	Ado	2374	314	3598	587	2353	385	994	174	2067	330	288	76	591	152	10	Ado	0.8829	0.859565	0.859124	0.850427	0.862026	0.789617	0.794631	2.9145	2.61371	2.60844	2.50734	2.64333	1.90814	1.95207
10	Zfp365	268	494			208	494	168	227	403	72	100	33	0	50	10	Zfp365	0.352094		0.296875	0.425693	0.84696	0.748148	0.0192308	-0.879822		-1.24393	-0.432011	2.46839	1.57075	-5.67243
10	Rtkn2			1226	678	667	758	310	891	434	1471	35	189	170	655	10	Rtkn2		0.643757	0.468115	0.25852	0.228107	0.159292	0.206771		0.853652	-0.184252	-1.52013	-1.75869	-2.39993	-1.9397
10	Arid5b	913	1051	609	1219	630	952	251	167	1024	1269	453	460	882	839	10	Arid5b	0.464903	0.333333	0.398359	0.6	0.446623	0.496175	0.512478	-0.202869	-1	-0.594836	0.584963	-0.309205	-0.0220745	0.0720241
10	A930033H14Rik									0	65					10	A930033H14Rik					0.0149254							-6.04439
10	Cdk1	3419	3193	3940	3690	3902	4500	3078	3041	4679	6348	1447	1628	3062	3580	10	Cdk1	0.517085	0.516378	0.464422	0.503022	0.424336	0.470588	0.461017	0.098632	0.09455	-0.205662	0.0174417	-0.440021	-0.169925	-0.225417
10	Ank3	45	62	590	2040	673	745	247	651	177	1248			72	284	10	Ank3	0.422018	0.224544	0.474648	0.275556	0.124737		0.203911	-0.453718	-1.78805	-0.146427	-1.39453	-2.81082		-1.96499
10	Ccdc6	416	251	465	29	782	532	456	465	424	282	73	18	100	102	10	Ccdc6	0.623318	0.939516	0.594985	0.495125	0.600282	0.795699	0.495098	0.726624	3.9573	0.554877	-0.0281358	0.586661	1.96153	-0.028289
10	Fam13c	32	24			34	11			105	231					10	Fam13c	0.568966		0.744681		0.313609			0.400538		1.54432		-1.13006
10	Phyhipl					41	53	35	35	240	259					10	Phyhipl			0.4375	0.5	0.481038					-0.36257	0	-0.109478
10	Bicc1	254	106					3	39	391	399					10	Bicc1	0.70442			0.0909091	0.494949			1.25289			-3.32193	-0.0291463
10	AC079680.1					54	0									10	AC079680.1			0.982143							5.78136
10	Tfam	351	299	1689	690	993	893	772	812	1434	1507	529	523	832	1247	10	Tfam	0.539877	0.709786	0.526483	0.48739	0.487598	0.502846	0.400288	0.230613	1.29027	0.152971	-0.0727869	-0.0715857	0.0164255	-0.58323
10	Ube2d1	687	407	1039	649	1072	644	461	381	757	447	209	78	53	164	10	Ube2d1	0.627737	0.615385	0.624563	0.547393	0.628524	0.726644	0.246575	0.753839	0.678072	0.734279	0.27432	0.758699	1.41046	-1.61143
10	Cisd1	226	297	346	497	622	628	442	332	646	488	279	76	674	338	10	Cisd1	0.432381	0.410651	0.497604	0.570876	0.569542	0.784314	0.66568	-0.39262	-0.52121	-0.0138279	0.411785	0.403931	1.8625	0.993602
10	Ipmk	50	406	118	882	513	475	759	678	1179	682	255	107	852	472	10	Ipmk	0.111354	0.118762	0.519192	0.528145	0.633387	0.703297	0.643288	-2.99646	-2.89145	0.110807	0.162588	0.788829	1.24511	0.850706
10	Zwint	3896	3246	3667	2544	2681	2586	2532	1963	5240	4660	1406	1086	2320	2040	10	Zwint	0.545493	0.590375	0.509015	0.563264	0.529287	0.564154	0.532095	0.263257	0.527328	0.0520292	0.367052	0.169203	0.37227	0.18547
10	Bcr	47	80	142	399	241	310	215	197	70	149	14	54	40	181	10	Bcr	0.372093	0.263352	0.437613	0.521739	0.321267	0.214286	0.183857	-0.754888	-1.48398	-0.361908	0.125531	-1.07907	-1.87447	-2.15024
10	Specc1l	955	835	239	1464	502	615	414	528	1239	1269	184	177	710	386	10	Specc1l	0.533482	0.140762	0.449508	0.439619	0.494024	0.509642	0.647541	0.193508	-2.60979	-0.292372	-0.350156	-0.0344884	0.055648	0.877516
10	Upb1					38	39	37	40							10	Upb1			0.493671	0.481013						-0.0365259	-0.109624
10	Snrpd3	2937	3471	3253	2698	3031	2574	2506	2740	5279	4880	1357	1473	3685	3724	10	Snrpd3	0.458346	0.546615	0.540753	0.477706	0.519634	0.47952	0.497369	-0.240933	0.269789	0.235697	-0.12874	0.113361	-0.118253	-0.0151844
10	Lrrc75b	21	412													10	Lrrc75b	0.0505747							-4.23057
10	Ggt1									109	288			101	144	10	Ggt1					0.275689		0.412955					-1.39357		-0.507484
10	Ggt5			0	349			27	79							10	Ggt5		0.002849		0.259259					-8.45121		-1.51457
10	Susd2	0	75	1525	1181	517	751	142	51	174	51	39	34			10	Susd2	0.012987	0.563516	0.407874	0.733333	0.770925	0.533333		-6.24793	0.368525	-0.537781	1.45943	1.75077	0.192645
10	Cabin1	433	600	237	1219	882	987	751	553	636	901	51	259	318	317	10	Cabin1	0.419324	0.163237	0.47194	0.575804	0.413905	0.166667	0.500785	-0.46967	-2.35785	-0.162098	0.440847	-0.501834	-2.32193	0.00452966
10	Ddt	1307	697	1541	508	1329	1466	2489	1224	3153	1392	584	365	2237	1033	10	Ddt	0.652044	0.751828	0.475509	0.670256	0.693644	0.615142	0.683985	0.906064	1.59907	-0.141443	1.02336	1.17899	0.676593	1.11397
10	Gstt1					14	36	76	12	85	36			38	156	10	Gstt1			0.288462	0.855556	0.699187		0.19898			-1.30256	2.56635	1.21681		-2.00922
10	Derl3					9	120	149	166	125	124					10	Derl3			0.0763359	0.473186	0.501992					-3.59694	-0.154886	0.0114956
10	Smarcb1	1390	1320	1648	1182	2065	1657	1571	1490	2530	3170	910	727	1143	1691	10	Smarcb1	0.512906	0.582274	0.55478	0.513222	0.443879	0.555827	0.403385	0.074492	0.479141	0.317396	0.076321	-0.32523	0.323513	-0.564643
10	Mmp11	190	241			36	98	97	25	210	317	49	43	148	14	10	Mmp11	0.441109		0.272059	0.790323	0.398866	0.531915	0.908537	-0.341434		-1.4199	1.91427	-0.591784	0.184425	3.31228
10	Chchd10	43	52	1008	1233	4042	3326	6103	4902	6066	5930	2712	2428	4734	4580	10	Chchd10	0.453608	0.449844	0.548575	0.554556	0.505668	0.527616	0.508265	-0.268489	-0.290416	0.281204	0.31609	0.0327079	0.159527	0.0477019
10	Vpreb3									4	248					10	Vpreb3					0.019685							-5.63807
10	Zfp280b	56	209	638	171	797	820	556	461	1279	1128	241	247	610	675	10	Zfp280b	0.213483	0.787916	0.492897	0.546614	0.531341	0.493878	0.474747	-1.88136	1.89341	-0.0409935	0.269784	0.181098	-0.0353331	-0.145851
10	Slc5a4b					208	54	165	71	252	140	71	32			10	Slc5a4b			0.791667	0.697479	0.642132	0.685714				1.926	1.20511	0.843442	1.12553
10	Dip2a	94	103			26	78	16	33	4	49					10	Dip2a	0.477387		0.254717	0.333333	0.0909091			-0.130584		-1.54889	-1	-3.32193
10	Pcnt	0	46	97	104	78	199	63	127	98	351	41	75	64	159	10	Pcnt	0.0208333	0.482759	0.283154	0.333333	0.219512	0.355932	0.288889	-5.55459	-0.0995357	-1.34008	-1	-1.83007	-0.85561	-1.29956
10	1700094J05Rik					47	32			14	34					10	1700094J05Rik			0.592593		0.3					0.540568		-1.22239
10	Ybey			1	472	99	60	191	131	170	213			29	55	10	Ybey		0.00421053	0.621118	0.592593	0.444156		0.348837		-7.8857	0.713119	0.540568	-0.323614		-0.900464
10	Mcm3ap	156	531	345	786	1386	524	1203	790	2048	865	854	336	1029	742	10	Mcm3ap	0.227866	0.305384	0.725418	0.603509	0.702916	0.717282	0.580936	-1.76066	-1.18559	1.40158	0.606086	1.24248	1.34318	0.47121
10	Lss	370	219	1	897	747	1003	638	780	456	970	121	77	246	131	10	Lss	0.62775	0.00222222	0.426941	0.45	0.320028	0.61	0.651715	0.753916	-8.81057	-0.424649	-0.289507	-1.08728	0.645335	0.903973
10	4930483K19Rik	340	263	0	888	1044	1064	1041	640	918	1604	210	121	328	148	10	4930483K19Rik	0.563636	0.0011236	0.495261	0.619133	0.364105	0.633634	0.688285	0.369234	-9.79604	-0.0273505	0.700959	-0.804437	0.790362	1.14278
10	Col6a2	5481	5158	3786	2442	101	280	196	174	1300	1746					10	Col6a2	0.515177	0.607865	0.266319	0.52957	0.426837			0.0876109	0.632402	-1.462	0.170841	-0.425259
10	Col6a1	13115	12441	2254	5134	423	227	928	529	3045	3389	0	134	145	190	10	Col6a1	0.513186	0.305142	0.650307	0.636737	0.473275	0.00735294	0.433234	0.0761094	-1.18724	0.89503	0.809686	-0.154369	-7.07682	-0.387604
10	Pcbp3	86	71			98	128	90	127	256	1248	16	96	103	87	10	Pcbp3	0.54717		0.434211	0.415525	0.170651	0.149123	0.541667	0.273018		-0.381871	-0.492205	-2.28093	-2.51245	0.241008
10	Slc19a1	473	508	1463	872	581	260	201	122	505	216	90	82	197	241	10	Slc19a1	0.482197	0.626444	0.690391	0.621538	0.699862	0.522989	0.45	-0.102779	0.745862	1.15697	0.715697	1.22144	0.132755	-0.289507
10	Col18a1	1693	1321	564	566	4052	1221	4204	2456	6647	6553	2461	2059	4979	4574	10	Col18a1	0.561671	0.499117	0.768341	0.631192	0.50356	0.544449	0.521193	0.357712	-0.00509787	1.72975	0.775208	0.0205447	0.257186	0.122374
10	Pofut2	3425	3008			480	840	679	553	831	1794	119	159	281	205	10	Pofut2	0.532401		0.363843	0.551053	0.316711	0.428571	0.577869	0.187241		-0.806069	0.295649	-1.10933	-0.415037	0.453051
10	Adarb1	42	104	153	530	177	365	58	146	40	191			6	36	10	Adarb1	0.290541	0.224818	0.327206	0.286408	0.175966		0.159091	-1.28798	-1.78578	-1.03997	-1.31703	-2.22741		-2.4021
10	2810425M01Rik	2126	1888	4071	2397	2716	1047	826	1153	2012	2065	403	499	1062	1673	10	2810425M01Rik	0.529631	0.629366	0.721647	0.417466	0.493503	0.446903	0.388381	0.171197	0.763906	1.37438	-0.480684	-0.0374931	-0.307573	-0.655158
10	Itgb2			470	864			41	21							10	Itgb2		0.352545		0.65625					-0.876973		0.932886
10	Pttg1ip	5735	4214	6695	3978	3620	2424	2090	2327	3234	4053	572	491	1929	1306	10	Pttg1ip	0.576424	0.62726	0.598908	0.473184	0.443819	0.538028	0.596231	0.444512	0.750894	0.578403	-0.154898	-0.32558	0.219877	0.562342
10	1810043G02Rik	734	676			206	168	68	179	171	325			48	156	10	1810043G02Rik	0.520538		0.550532	0.277108	0.345382		0.237864	0.118588		0.292608	-1.38333	-0.922463		-1.67991
10	Pfkl	1241	1216	10915	4999	11826	11213	10725	12179	11869	11554	1206	1574	3576	4610	10	Pfkl	0.505083	0.685851	0.513302	0.468262	0.506724	0.433861	0.436859	0.029336	1.12644	0.0767832	-0.183402	0.0388027	-0.383926	-0.36633
10	Aire			170	64	1793	2177	2258	2807	1374	1814	16	27	934	1712	10	Aire		0.724576	0.451662	0.445826	0.431034	0.377778	0.353097		1.39548	-0.279824	-0.313859	-0.400538	-0.719892	-0.873487
10	Dnmt3l					1488	1214	1377	1821	2436	2344	984	826	3297	3117	10	Dnmt3l			0.550666	0.430625	0.509619	0.543598	0.514027			0.293387	-0.402947	0.0555183	0.252236	0.0809705
10	Icosl					32	70			280	238			118	164	10	Icosl			0.317308		0.540385		0.419014			-1.10535		0.23356		-0.471504
10	D10Jhu81e	813	1031	942	441	1206	610	946	757	1280	923	371	302	819	940	10	D10Jhu81e	0.440953	0.680866	0.663916	0.555425	0.580952	0.551111	0.465645	-0.342342	1.09321	0.982181	0.321167	0.471306	0.295985	-0.198571
10	Pwp2	316	553	0	964	531	738	562	477	925	729	371	242	682	510	10	Pwp2	0.363949	0.0010352	0.418568	0.540826	0.559179	0.604878	0.572027	-0.805403	-9.91439	-0.474148	0.236124	0.343116	0.614346	0.418562
10	Trappc10	103	119			29	127	70	40	80	81	20	24	18	51	10	Trappc10	0.464286		0.189873	0.633929	0.496933	0.456522	0.267606	-0.206451		-2.09311	0.792195	-0.017702	-0.251539	-1.45251
10	Agpat3	186	200	60	127	275	187	168	151	192	84	46	22	153	87	10	Agpat3	0.481959	0.322751	0.594828	0.52648	0.694245	0.671429	0.636364	-0.104157	-1.06926	0.553936	0.152952	1.18307	1.03103	0.807355
10	Rrp1	900	1002	1433	1312	1539	1200	986	954	1954	2407	530	406	998	816	10	Rrp1	0.473214	0.522024	0.561839	0.508239	0.448086	0.566098	0.55011	-0.154723	0.127178	0.358694	0.0475494	-0.300667	0.383683	0.290149
10	Cstb	11116	11845	6387	4001	8262	6765	10468	6557	6375	5764	1232	1090	4621	2863	10	Cstb	0.484127	0.614822	0.549804	0.614847	0.525163	0.530551	0.617419	-0.0916325	0.674643	0.288362	0.674796	0.145331	0.176522	0.690486
10	Pdxk	368	502	356	72	205	348	433	538	809	661	174	162	385	499	10	Pdxk	0.423165	0.830233	0.371171	0.446043	0.550272	0.517751	0.435666	-0.446938	2.28996	-0.760583	-0.31259	0.291091	0.102483	-0.373327
10	Ilvbl	443	640	263	1239	317	182	380	166	851	499	26	31	6	79	10	Ilvbl	0.409217	0.175532	0.634731	0.695255	0.630178	0.457627	0.0804598	-0.529765	-2.23173	0.797183	1.18994	0.768925	-0.245112	-3.51457
10	Syde1	837	589					44	46							10	Syde1	0.586835			0.48913				0.506235			-0.0627358
10	Casp14			7	261	0	841	93	107	11	308			0	93	10	Casp14		0.0296296	0.00118624	0.465347	0.0373832		0.0105263		-5.03342	-9.71768	-0.200299	-4.6865		-6.55459
10	Slc1a6	155	792													10	Slc1a6	0.164384							-2.34577
10	2610008E11Rik	534	360			97	46	82	345	281	348			84	85	10	2610008E11Rik	0.597098		0.675862	0.193473	0.44691		0.497076	0.56754		1.06012	-2.05959	-0.307532		-0.0168738
10	Plpp2	1655	2718	3022	2330	1095	1612	638	448	667	372			540	211	10	Plpp2	0.378514	0.564625	0.404577	0.587316	0.641691		0.718459	-0.715373	0.375032	-0.557499	0.5091	0.840672		1.35156
10	Mier2	203	132	0	270	274	311	271	262	324	352	56	140	180	122	10	Mier2	0.605341	0.00367647	0.468484	0.508411	0.479351	0.287879	0.595395	0.617143	-8.08215	-0.182114	0.0485439	-0.119228	-1.30666	0.557331
10	Cdc34	488	241	969	751	875	470	766	392	1261	926	427	348	919	479	10	Cdc34	0.668947	0.563298	0.650334	0.661207	0.576519	0.550837	0.657143	1.01483	0.367252	0.895204	0.964697	0.445071	0.294384	0.938599
10	Gzmm					13	66							27	30	10	Gzmm			0.17284				0.474576			-2.25873				-0.146841
10	Bsg	9050	7468	11222	6675	9090	8806	7476	7457	10038	11401	1500	1588	4571	4782	10	Bsg	0.547881	0.627018	0.507934	0.500636	0.468215	0.485761	0.488723	0.277162	0.749403	0.0457883	0.00367074	-0.183671	-0.0821951	-0.0650904
10	Hcn2															10	Hcn2
10	Polrmt	112	349	84	0	800	951	350	397	1169	817	245	190	888	622	10	Polrmt	0.24406	0.988372	0.456931	0.468625	0.588531	0.562929	0.587963	-1.63103	6.40939	-0.249159	-0.181297	0.516336	0.365086	0.512951
10	Misp			946	2546	1979	1327	645	525	261	166					10	Misp		0.271036	0.598549	0.551195	0.610723				-1.42736	0.576245	0.296471	0.649719
10	Ptbp1					28	34	41	13							10	Ptbp1			0.453125	0.75						-0.271302	1.58496
10	Prtn3									0	115					10	Prtn3					0.00854701							-6.85798
10	Med16	527	1085	2343	2292	610	1566	644	522	2044	1905	273	419	497	825	10	Med16	0.327138	0.505499	0.280533	0.552226	0.51759	0.394813	0.376133	-1.04041	0.0317362	-1.35876	0.302488	0.101553	-0.616213	-0.729996
10	R3hdm4	787	605	834	443	1046	496	505	410	869	328	46	71	66	130	10	R3hdm4	0.56528	0.652854	0.678109	0.551799	0.725605	0.394958	0.338384	0.378878	0.911217	1.07494	0.299999	1.40293	-0.615336	-0.967334
10	Kiss1r			723	274	966	666	355	134							10	Kiss1r		0.724725	0.591799	0.725051					1.39656	0.535829	1.39892
10	Arid3a	5	99	217	978	140	297	57	180	227	346					10	Arid3a	0.0566038	0.182122	0.321185	0.242678	0.396522			-4.05889	-2.16698	-1.07962	-1.64186	-0.605902
10	Wdr18	662	520	629	566	470	503	643	720	1172	957	425	342	1285	814	10	Wdr18	0.559966	0.526316	0.483077	0.471795	0.550446	0.553966	0.612089	0.347725	0.152003	-0.0976967	-0.162939	0.292105	0.312645	0.658019
10	Tmem259	190	283	122	1060	280	323	110	150	384	289	48	87	86	152	10	Tmem259	0.402105	0.103885	0.464463	0.423664	0.57037	0.357664	0.3625	-0.572318	-3.10869	-0.205424	-0.443989	0.408806	-0.844722	-0.814444
10	Cnn2	16455	14291	983	1355	1054	1096	1103	903	2179	1429	206	160	405	233	10	Cnn2	0.535189	0.420513	0.490242	0.549801	0.603878	0.5625	0.634375	0.203406	-0.462627	-0.0563205	0.288345	0.608313	0.36257	0.794971
10	Abca7			57	0	116	136	150	84	94	201					10	Abca7		0.983051	0.46063	0.639831	0.319865				5.85798	-0.227667	0.829014	-1.08836
10	Arhgap45	2	158	34	761	332	446	372	117	553	357	12	45	56	405	10	Arhgap45	0.0185185	0.0439147	0.426923	0.759674	0.607456	0.220339	0.12311	-5.72792	-4.44436	-0.424753	1.66039	0.629926	-1.82312	-2.83245
10	Polr2e	1515	2398	2615	2988	4887	4293	3593	2803	5214	4419	2108	1701	5010	3116	10	Polr2e	0.387229	0.466726	0.532346	0.561738	0.541256	0.553398	0.616511	-0.662163	-0.1923	0.186922	0.358104	0.238621	0.309328	0.68494
10	Gpx4							40	27	10	82			33	16	10	Gpx4				0.594203	0.117021		0.666667				0.550197	-2.91561		1
10	Sbno2	578	654	244	789	281	426	357	561	364	387	56	120	128	242	10	Sbno2	0.469206	0.236715	0.397743	0.38913	0.484728	0.320225	0.346774	-0.177932	-1.68907	-0.598541	-0.650611	-0.0881602	-1.08597	-0.913585
10	Stk11	418	263	525	459	295	267	307	184	459	595	160	132	304	399	10	Stk11	0.61347	0.533469	0.524823	0.624746	0.435606	0.547619	0.432624	0.666412	0.193429	0.143364	0.735405	-0.373678	0.275634	-0.391191
10	Cbarp			53	26	70	16			95	37					10	Cbarp		0.666667	0.806818		0.716418				1	2.06228		1.33703
10	Atp5d	2999	3132	5294	4353	5226	5764	2787	2658	2991	2798	791	740	2271	2039	10	Atp5d	0.489157	0.548762	0.475528	0.511841	0.516664	0.516634	0.526902	-0.0625823	0.282289	-0.141337	0.0683468	0.0961987	0.0960269	0.155394
10	Midn	342	193	894	509	179	35	178	85	280	220	29	47	88	284	10	Midn	0.638734	0.637011	0.833333	0.675472	0.559761	0.384615	0.237968	0.822152	0.81139	2.32193	1.05755	0.346524	-0.678072	-1.67908
10	Cirbp	146	134	80	223	168	147	292	263	451	463	72	100	204	181	10	Cirbp	0.521277	0.265574	0.533123	0.526032	0.49345	0.41954	0.529716	0.122857	-1.4675	0.191426	0.150363	-0.037802	-0.468387	0.171685
10	1600002K03Rik	220	139	5	216	199	147	37	8	81	83			39	19	10	1600002K03Rik	0.612188	0.0269058	0.574713	0.808511	0.493976		0.666667	0.65862	-5.17659	0.434403	2.078	-0.0347654		1
10	Efna2	0	115							193	56			0	70	10	Efna2	0.00854701				0.772908		0.0138889	-6.85798				1.76702		-6.14975
10	Mum1	243	254	200	1004	415	344	336	253	570	609	97	107	418	368	10	Mum1	0.488978	0.166667	0.546649	0.57022	0.483489	0.475728	0.531726	-0.0636161	-2.32193	0.269987	0.40792	-0.0953185	-0.140178	0.183329
10	Ndufs7	683	666	938	1369	806	796	631	666	1071	1219	306	416	821	646	10	Ndufs7	0.506292	0.40667	0.503117	0.486528	0.467714	0.424033	0.559564	0.0363096	-0.544979	0.0179889	-0.0777622	-0.186576	-0.441809	0.345373
10	Dazap1	84	75	101	306	70	49	30	33	59	99	38	10	16	28	10	Dazap1	0.52795	0.249389	0.586777	0.476923	0.375	0.78	0.369565	0.161463	-1.58967	0.505891	-0.133267	-0.736966	1.82597	-0.770518
10	Rps15	11619	5051	11126	5157	11168	4212	10962	4319	11613	6502	3932	1561	11494	3412	10	Rps15	0.696977	0.683267	0.726108	0.717333	0.641055	0.715742	0.771063	1.20168	1.10918	1.40658	1.34354	0.836688	1.33224	1.75189
10	Reep6			45	0	204	548	392	681	507	1033	144	210	442	428	10	Reep6		0.978723	0.271883	0.365581	0.329442	0.407303	0.508028		5.52356	-1.42118	-0.795242	-1.02534	-0.54119	0.0463291
10	Adamtsl5	443	363	0	98			53	42	31	22			24	46	10	Adamtsl5	0.549505	0.01		0.556701	0.581818		0.347222	0.286621	-6.62936		0.328623	0.476438		-0.910733
10	Plk5					0	48	40	110	30	14	30	13	31	33	10	Plk5			0.02	0.269737	0.673913	0.688889	0.484848			-5.61471	-1.43686	1.04731	1.14684	-0.0874628
10	Mex3d	113	75	221	275			26	49	101	43					10	Mex3d	0.6	0.445783		0.350649	0.69863			0.584963	-0.314109		-0.888969	1.21299
10	Mbd3	206	329	223	332	334	443	263	229	442	622	146	154	400	627	10	Mbd3	0.385475	0.402154	0.430039	0.534413	0.415572	0.486755	0.389699	-0.672835	-0.572023	-0.406399	0.198904	-0.491925	-0.0764521	-0.647162
10	Tcf3	539	578	309	213	351	216	327	342	1551	1451	320	221	634	659	10	Tcf3	0.482574	0.591603	0.618629	0.488823	0.516644	0.59116	0.490347	-0.100604	0.534657	0.69788	-0.0645128	0.0960871	0.532014	-0.0557094
10	Rexo1	188	151	356	484	594	338	364	471	752	504	150	107	356	337	10	Rexo1	0.554252	0.42399	0.637045	0.436081	0.598569	0.583012	0.513669	0.314315	-0.442061	0.811604	-0.37089	0.576366	0.483517	0.0789008
10	Klf16	84	56	90	11	142	96	87	85	107	107	28	25	29	28	10	Klf16	0.598592	0.883495	0.595833	0.505747	0.5	0.527273	0.508475	0.576501	2.92283	0.559958	0.0331669	0	0.157541	0.0489096
10	Adat3	75	81	422	516	318	253	70	117	349	326	85	87	121	54	10	Adat3	0.481013	0.45	0.556719	0.375661	0.516987	0.494253	0.689266	-0.109624	-0.289507	0.328728	-0.732896	0.0980643	-0.0331669	1.14938
10	Csnk1g2	164	224	589	201	209	165	52	166	189	314	55	48	94	127	10	Csnk1g2	0.423077	0.744949	0.558511	0.240909	0.376238	0.533333	0.426009	-0.447459	1.54636	0.339206	-1.65578	-0.729352	0.192645	-0.430144
10	Btbd2	43	50			127	69	144	157	92	179			257	143	10	Btbd2	0.463158		0.646465	0.478548	0.340659		0.641791	-0.212994		0.870717	-0.123872	-0.952694		0.841302
10	Mknk2	288	201			502	636	267	253	404	297	63	46			10	Mknk2	0.588595		0.441228	0.51341	0.576102	0.576577		0.516714		-0.340735	0.0774045	0.44261	0.445411
10	Mob3a	3585	3637	416	917	431	439	471	419	655	492	189	121	372	439	10	Mob3a	0.496401	0.31236	0.495413	0.529148	0.570931	0.608974	0.458795	-0.0207701	-1.13845	-0.0264722	0.168398	0.412108	0.639118	-0.238328
10	Ap3d1	311	562	808	555	512	775	307	386	722	762	118	296	284	473	10	Ap3d1	0.356571	0.592674	0.397983	0.443165	0.486541	0.286058	0.375494	-0.851589	0.541055	-0.597098	-0.329403	-0.0776874	-1.3195	-0.733925
10	Dot1l	401	319	87	399	638	198	386	163	526	392	108	54	236	268	10	Dot1l	0.556787	0.180328	0.76253	0.702359	0.572826	0.664634	0.468379	0.329124	-2.18442	1.68305	1.23864	0.423274	0.986825	-0.182719
10	Sf3a2	357	293	257	305	421	356	316	285	653	473	226	170	349	365	10	Sf3a2	0.54908	0.457447	0.54172	0.525705	0.579787	0.570352	0.488827	0.284143	-0.246161	0.241319	0.148468	0.464404	0.408696	-0.0644887
10	Lingo3					215	112							0	92	10	Lingo3			0.656535				0.0106383			0.934709				-6.53916
10	Lsm7	138	1067	421	1967	178	1101	96	1063	367	1788	114	459	215	1249	10	Lsm7	0.115162	0.176569	0.139735	0.0835487	0.170607	0.2	0.14734	-2.94175	-2.22142	-2.62209	-3.45537	-2.28138	-2	-2.53282
10	Sppl2b	89	34	230	242	35	42	70	43	70	105					10	Sppl2b	0.72	0.487342	0.455696	0.617391	0.40113			1.36257	-0.0730635	-0.25634	0.690316	-0.578173
10	Timm13	2012	1948	2293	1389	1577	1533	1612	1352	2494	2204	1035	683	1804	1718	10	Timm13	0.508077	0.622693	0.507069	0.54383	0.530851	0.602326	0.512202	0.0466131	0.722781	0.0407987	0.253585	0.178261	0.598956	0.0704293
10	Lmnb2	358	572	2456	1178	848	558	968	727	1113	893	221	238	1038	519	10	Lmnb2	0.385193	0.675743	0.602983	0.571008	0.554781	0.481562	0.666453	-0.674551	1.05933	0.602916	0.412558	0.317402	-0.106451	0.998612
10	Gadd45b	1286	696	261	160	238	219	330	361	663	459	138	49	116	201	10	Gadd45b	0.64869	0.619385	0.520697	0.477633	0.590747	0.73545	0.366771	0.884781	0.702506	0.119507	-0.129158	0.529549	1.47508	-0.787847
10	Slc39a3	188	348	167	114	266	358	185	172	130	53			4	84	10	Slc39a3	0.351301	0.59364	0.426518	0.518106	0.708108		0.0555556	-0.884841	0.546827	-0.427144	0.104531	1.27854		-4.08746
10	Sgta	1080	844	1246	1606	1303	1215	755	892	1389	1586	385	390	984	736	10	Sgta	0.561267	0.436931	0.51746	0.45846	0.466913	0.496782	0.572009	0.355343	-0.365908	0.100801	-0.240274	-0.191217	-0.0185678	0.418459
10	Thop1	1292	1320	4461	2109	2964	3518	1894	2023	2895	2597	664	820	1503	2430	10	Thop1	0.494644	0.678941	0.457279	0.483542	0.52712	0.44751	0.382211	-0.0309082	1.08045	-0.247133	-0.0950114	0.15666	-0.304028	-0.692745
10	Map2k2	879	2000	368	1501	936	1118	790	694	1085	1045	284	254	912	999	10	Map2k2	0.305449	0.197221	0.455739	0.532301	0.509381	0.527778	0.477261	-1.18515	-2.02519	-0.256089	0.186665	0.0541413	0.160465	-0.131313
10	Zbtb7a	668	527	407	833	675	481	268	474	186	158			108	83	10	Zbtb7a	0.558897	0.328502	0.583765	0.361559	0.540462		0.564767	0.341468	-1.03148	0.48799	-0.820321	0.234012		0.375867
10	Pias4	139	72	281	130	172	224	117	127	133	259	46	56	255	103	10	Pias4	0.657277	0.682809	0.434673	0.479675	0.340102	0.451923	0.711111	0.939458	1.10613	-0.379153	-0.117357	-0.956279	-0.278301	1.29956
10	Eef2	1302	1352	1686	1398	1912	1967	1242	1463	1464	1914	346	278	686	779	10	Eef2	0.490587	0.546662	0.492914	0.45918	0.433432	0.554313	0.468303	-0.0543248	0.270064	-0.0408933	-0.236089	-0.386444	0.314671	-0.183164
10	Dapk3	16	58	89	179	105	66	34	51	98	243	62	114	60	79	10	Dapk3	0.223684	0.333333	0.612717	0.402299	0.28863	0.353933	0.432624	-1.79518	-1	0.661831	-0.571157	-1.30138	-0.86821	-0.391191
10	Atcay	9	31	64	54			57	73					20	31	10	Atcay	0.238095	0.541667		0.439394			0.396226	-1.67807	0.241008		-0.351472			-0.607683
10	Zfr2			0	454											10	Zfr2		0.00219298							-8.82972
10	Apba3	426	479	494	680	885	782	267	533	533	594	127	133	151	230	10	Apba3	0.470783	0.420918	0.530857	0.334165	0.472985	0.48855	0.396867	-0.168798	-0.460226	0.178294	-0.994607	-0.15605	-0.0660892	-0.603822
10	Tjp3			1412	884	914	1619	439	482	390	133			381	95	10	Tjp3		0.614883	0.360947	0.476706	0.744762		0.799163		0.675012	-0.82415	-0.13452	1.54494		1.99247
10	Pip5k1c	379	757	721	1402	1120	818	357	497	563	616	154	131	574	284	10	Pip5k1c	0.333919	0.339765	0.577835	0.418224	0.477561	0.54007	0.668605	-0.996198	-0.958444	0.452851	-0.476186	-0.129575	0.23173	1.0126
10	Cactin	366	219	484	614	414	370	393	145	397	448	99	165	495	251	10	Cactin	0.625213	0.440909	0.52799	0.72963	0.469894	0.37594	0.663102	0.738277	-0.342602	0.161692	1.43223	-0.173947	-0.731183	0.976916
10	Hmg20b	389	337	855	385	305	358	257	427	370	617	90	150	440	456	10	Hmg20b	0.535714	0.689211	0.46015	0.376093	0.375126	0.376033	0.491091	0.206451	1.14901	-0.230452	-0.73024	-0.736188	-0.73061	-0.0514155
10	4930404N11Rik	52	193	1	266	216	235	350	559	633	529	157	214	231	447	10	4930404N11Rik	0.214575	0.00743494	0.479029	0.385291	0.544674	0.423592	0.341176	-1.87199	-7.0607	-0.121092	-0.673956	0.25849	-0.444412	-0.949374
10	Fzr1	414	538	1325	1381	1040	1071	755	699	900	1330	330	370	791	630	10	Fzr1	0.43501	0.48966	0.492664	0.519231	0.403674	0.47151	0.556571	-0.377174	-0.0596768	-0.0423348	0.111031	-0.562912	-0.164588	0.32786
10	Nfic	788	726	335	371	222	137	188	135	171	144	34	14	116	128	10	Nfic	0.520449	0.474576	0.617729	0.581538	0.542587	0.7	0.47561	0.11807	-0.146841	0.692375	0.47478	0.246356	1.22239	-0.140863
10	Celf5			0	195	16	30			31	227					10	Celf5		0.00507614	0.354167		0.123077				-7.61471	-0.866733		-2.83289
10	Ncln	1284	1283	989	2326	1039	611	621	521	786	676	220	195	714	866	10	Ncln	0.500195	0.298462	0.62954	0.543706	0.537568	0.529976	0.45196	0.00112316	-1.23297	0.76498	0.252865	0.217208	0.173193	-0.278089
10	Gna11	565	373	109	182	432	204	99	118	312	206	50	39	119	86	10	Gna11	0.602128	0.375427	0.678683	0.456621	0.601923	0.56044	0.57971	0.597764	-0.73434	1.07874	-0.250962	0.596532	0.350497	0.463947
10	Tle2	0	40							30	10					10	Tle2	0.0238095				0.738095			-5.35755				1.49476
10	Tle6	101	91	405	165	96	67	62	81	121	79	38	30	97	140	10	Tle6	0.525773	0.70979	0.587879	0.434483	0.60396	0.557143	0.410042	0.148863	1.2903	0.51245	-0.380272	0.608809	0.331206	-0.524842
10	Sirt6	122	253	587	476	458	428	292	663	676	687	105	229	509	556	10	Sirt6	0.32626	0.552113	0.516892	0.306165	0.495971	0.315476	0.477976	-1.04617	0.301827	0.0975165	-1.18028	-0.0232527	-1.11757	-0.12718
10	Ankrd24	121	196	0	352	182	274	252	68	487	135	126	91	99	104	10	Ankrd24	0.382445	0.00282486	0.399563	0.785714	0.782051	0.579909	0.487805	-0.691314	-8.46352	-0.587588	1.87447	1.84327	0.465123	-0.0703893
10	Zfp873	16	41	87	0	0	76	134	67	825	360					10	Zfp873	0.288136	0.988764	0.0128205	0.665025	0.695872			-1.30485	6.45943	-6.26679	0.989353	1.19414
10	AC158605.2			0	92			5	58					24	105	10	AC158605.2		0.0106383		0.0923077			0.19084		-6.53916		-3.29768			-2.08406
10	AU041133									14	63					10	AU041133					0.189873							-2.09311
10	AC158605.3													4	79	10	AC158605.3							0.0588235							-4
10	Zfp938	80	43	101	85	56	79	121	61	258	94			98	80	10	Zfp938	0.648	0.542553	0.416058	0.663043	0.731638		0.55	0.880418	0.246161	-0.489038	0.976541	1.44695		0.289507
10	1190007I07Rik	58	376	271	0	693	572	882	1262	891	771	270	250	926	1008	10	1190007I07Rik	0.135321	0.996337	0.547751	0.411463	0.536058	0.519157	0.478822	-2.67578	8.08746	0.276401	-0.516369	0.208443	0.110605	-0.122285
10	Tdg	262	663	338	1152	288	873	595	1295	1189	2251	239	511	358	1833	10	Tdg	0.283711	0.227212	0.248495	0.315011	0.345729	0.319149	0.163703	-1.33612	-1.76604	-1.59656	-1.12068	-0.920245	-1.09311	-2.35294
10	Glt8d2	129	0	0	995	37	45			0	43					10	Glt8d2	0.992366	0.00100301	0.452381		0.0222222			7.02237	-9.96	-0.275634		-5.45943
10	Hcfc2	526	356			22	194			298	116	50	21	117	153	10	Hcfc2	0.596154		0.105505		0.71875	0.69863	0.433824	0.561879		-3.08377		1.35364	1.21299	-0.384143
10	Nfyb	416	261	1383	437	1173	952	1550	998	1593	1303	385	421	957	815	10	Nfyb	0.614138	0.759605	0.551951	0.608235	0.550035	0.477723	0.540023	0.670481	1.65984	0.300884	0.634642	0.289708	-0.128642	0.231457
10	1700028I16Rik	0	73			22	29	0	140	7	85	6	61			10	1700028I16Rik	0.0133333		0.433962	0.00704225	0.0851064	0.101449		-6.20945		-0.383329	-7.13955	-3.42626	-3.14684
10	Txnrd1									0	90					10	Txnrd1					0.0108696							-6.50779
10	Chst11	80	24			0	94									10	Chst11	0.764151		0.0104167					1.69599		-6.56986
10	Slc41a2	183	225	0	202											10	Slc41a2	0.44878	0.00490196						-0.296617	-7.66534
10	D10Wsu102e	2882	1507	919	5124	5147	5006	1225	1044	2751	2578	631	577	1297	872	10	D10Wsu102e	0.65657	0.152192	0.506942	0.53985	0.516226	0.522314	0.597881	0.934934	-2.47785	0.0400656	0.230456	0.0936687	0.128855	0.572237
10	Aldh1l2	977	433	0	746	22	68	11	37	12	85			0	219	10	Aldh1l2	0.692635	0.0013369	0.25	0.24	0.131313		0.00452489	1.17214	-9.54496	-1.58496	-1.66297	-2.72583		-7.78136
10	Washc4	599	798	0	1051	755	1429	593	800	1313	1044	277	275	454	713	10	Washc4	0.428878	0.000949668	0.345837	0.425806	0.557016	0.501805	0.389222	-0.413233	-10.0389	-0.919557	-0.431339	0.330462	0.0104166	-0.650058
10	Appl2	71	178	1700	1467	390	467	93	168	45	311	30	65	50	32	10	Appl2	0.286853	0.536762	0.45518	0.357414	0.128492	0.319588	0.607143	-1.31389	0.212531	-0.25934	-0.846291	-2.76184	-1.0902	0.628031
10	1500009L16Rik	186	360	201	243	281	57	180	370	396	624	122	144	347	302	10	1500009L16Rik	0.341241	0.452915	0.829412	0.327899	0.388454	0.458955	0.534562	-0.948961	-0.272526	2.28157	-1.03543	-0.654717	-0.237395	0.19977
10	Nuak1	439	628							136	445			5	50	10	Nuak1	0.4116				0.234991		0.105263	-0.515556				-1.70287		-3.08746
10	Ckap4	8576	4556			228	43	387	159	1186	1189	316	120	709	215	10	Ckap4	0.653038		0.838828	0.708029	0.499369	0.723744	0.766739	0.912389		2.37977	1.27798	-0.00364164	1.38948	1.71679
10	Platr7					63	12	239	139	95	39	36	20	433	120	10	Platr7			0.831169	0.631579	0.705882	0.637931	0.781982			2.29956	0.777608	1.26303	0.817136	1.84269
10	Tcp11l2			35	43	41	120	112	86	43	16					10	Tcp11l2		0.45	0.257669	0.565	0.721311				-0.289507	-1.52655	0.377235	1.37197
10	Polr3b	410	332	670	1092	1245	1075	947	917	1966	1835	539	490	593	1163	10	Polr3b	0.552419	0.380385	0.536606	0.508039	0.517223	0.523763	0.337884	0.303616	-0.703909	0.211626	0.0463929	0.0994309	0.137236	-0.970556
10	Ric8b	121	113	466	953	88	117	80	55	50	201	18	34	31	58	10	Ric8b	0.516949	0.328642	0.429952	0.591241	0.201581	0.351852	0.351648	0.0978473	-1.03057	-0.40691	0.532495	-1.98579	-0.881356	-0.882643
10	Tmem263	1791	1088	0	235	417	229	147	165	586	525	99	85	149	179	10	Tmem263	0.622006	0.00421941	0.645062	0.471338	0.527403	0.537634	0.454545	0.718567	-7.88264	0.861869	-0.165586	0.158298	0.217591	-0.263034
10	Mterf2	30	17			83	96	32	28	206	118			80	54	10	Mterf2	0.632653		0.464088	0.532258	0.634969		0.595588	0.784271		-0.207595	0.186413	0.798669		0.55849
10	Cry1	214	250	333	461	507	496	547	397	783	617	223	107	406	278	10	Cry1	0.461373	0.419598	0.505473	0.579281	0.559201	0.674699	0.593294	-0.223351	-0.468045	0.0315826	0.461407	0.343247	1.05247	0.544764
10	Btbd11	47	208	0	372	52	339	157	317	223	186	74	91	69	203	10	Btbd11	0.18677	0.0026738	0.13486	0.331933	0.545012	0.449102	0.255474	-2.1224	-8.54303	-2.68147	-1.0091	0.26046	-0.294743	-1.54314
10	Prdm4	359	384	0	523	355	475	264	194	888	1102	532	314	250	360	10	Prdm4	0.483221	0.00190476	0.427885	0.576087	0.446285	0.628538	0.410131	-0.0968615	-9.03342	-0.419084	0.442518	-0.311177	0.758784	-0.524311
10	Rtcb	426	525	700	504	569	528	332	379	567	758	214	172	285	409	10	Rtcb	0.448059	0.58126	0.518653	0.467041	0.428033	0.554124	0.41092	-0.300827	0.473131	0.107694	-0.190477	-0.418209	0.313565	-0.519609
10	Fbxo7	282	146			541	839	636	225	621	451	154	247	343	378	10	Fbxo7	0.65814		0.392185	0.738123	0.579143	0.384615	0.475795	0.944986		-0.632096	1.49497	0.460592	-0.678072	-0.139789
10	Timp3	9947	8010			154	262	111	62	386	451	36	67	183	313	10	Timp3	0.553928		0.370813	0.64	0.461263	0.352381	0.369478	0.312424		-0.762795	0.830075	-0.223989	-0.878009	-0.771059
10	1810014B01Rik			0	117	66	64	95	244	139	363	12	45	46	18	10	1810014B01Rik		0.00840336	0.507576	0.281525	0.277778	0.220339	0.712121		-6.88264	0.0437214	-1.35168	-1.37851	-1.82312	1.30666
10	Hsp90b1	4986	5245	4159	2906	2923	2579	1717	1839	3716	4365	934	1097	2800	1387	10	Hsp90b1	0.487345	0.588651	0.53125	0.482856	0.459854	0.459911	0.668656	-0.0730456	0.517052	0.180572	-0.0989757	-0.232173	-0.23184	1.01293
10	Ttc41					0	144			43	162	0	57			10	Ttc41			0.00684932		0.21256	0.0169492				-7.17991		-1.8893	-5.85798
10	Nt5dc3	5	353			24	177	43	154	59	53					10	Nt5dc3	0.0166667		0.123153	0.221106	0.526316			-5.88264		-2.83188	-1.81669	0.152003
10	Stab2			42	0	57	140									10	Stab2		0.977273	0.291457						5.42626	-1.28157
10	Igf1					27	153	82	55	74	350					10	Igf1			0.153846	0.597122	0.176056					-2.45943	0.567685	-2.22651
10	Parpbp	203	287	28	1469	233	351	532	292	186	1220	101	283	250	545	10	Parpbp	0.414634	0.0193462	0.399317	0.645278	0.132812	0.264249	0.314931	-0.4975	-5.66362	-0.589067	0.863235	-2.70695	-1.47732	-1.12121
10	Nup37	510	367	769	426	503	532	450	421	523	831	165	215	713	577	10	Nup37	0.581342	0.643275	0.486017	0.516609	0.386431	0.434555	0.552632	0.473618	0.850622	-0.0807118	0.0958844	-0.667017	-0.379848	0.304855
10	Washc3	1249	812	1066	2048	1215	1187	567	802	739	1018	191	346	497	657	10	Washc3	0.605914	0.342426	0.505824	0.414296	0.420694	0.356215	0.430796	0.620601	-0.94136	0.0336084	-0.499509	-0.461557	-0.853829	-0.401942
10	Dram1	473	797	0	283											10	Dram1	0.372642	0.00350877						-0.751502	-8.14975
10	Gnptab	215	491			412	563	194	142	154	1258	102	480	205	461	10	Gnptab	0.305085		0.422723	0.576923	0.109618	0.17637	0.308383	-1.18763		-0.449553	0.447459	-3.02194	-2.22339	-1.16525
10	Sycp3					253	194	657	136	571	487	20	21	49	6	10	Sycp3			0.565702	0.827673	0.539623	0.488372	0.877193			0.381354	2.26391	0.229134	-0.0671142	2.8365
10	Spic					48	113	2	43	53	204					10	Spic			0.300613	0.0638298	0.208494					-1.21818	-3.87447	-1.92459
10	Arl1	522	1010	170	541	254	447	18	253	299	480	94	112	88	128	10	Arl1	0.340939	0.239832	0.362731	0.0695971	0.384123	0.456731	0.408257	-0.9509	-1.6643	-0.813001	-3.74076	-0.681074	-0.250323	-0.535494
10	Utp20	0	346	12	123	14	535	8	324	36	715	4	203	263	468	10	Utp20	0.00287356	0.0948905	0.0272232	0.0269461	0.0491368	0.0239234	0.360164	-8.43879	-3.25376	-5.1592	-5.17437	-4.27436	-5.3505	-0.82905
10	Gas2l3	23	83	0	409	131	175	75	99	107	123	11	30	25	45	10	Gas2l3	0.222222	0.00243309	0.428571	0.431818	0.465517	0.27907	0.361111	-1.80735	-8.67948	-0.415037	-0.395929	-0.199309	-1.36923	-0.823122
10	Scyl2	45	159	144	137	415	456	100	254	70	132	14	33	16	38	10	Scyl2	0.223301	0.512367	0.476518	0.283708	0.348039	0.306122	0.303571	-1.79837	0.0713846	-0.135611	-1.33614	-0.905535	-1.18057	-1.19794
10	Actr6	127	85			197	462	119	267	365	387	120	165	194	236	10	Actr6	0.598131		0.299546	0.309278	0.485411	0.421603	0.451389	0.573735		-1.22551	-1.1592	-0.084213	-0.456176	-0.281413
10	Uhrf1bp1l	998	937	7	667	293	454	226	548	665	465	145	114	85	578	10	Uhrf1bp1l	0.515746	0.0118343	0.392523	0.292526	0.588339	0.559387	0.129323	0.0908968	-6.3837	-0.63005	-1.27411	0.515192	0.344335	-2.75115
10	Anks1b	11	124							16	328			3	56	10	Anks1b	0.0875912				0.0491329		0.0655738	-3.38082				-4.27448		-3.83289
10	Apaf1	420	384	195	340	358	527	323	545	163	898			388	227	10	Apaf1	0.522333	0.364991	0.404735	0.372414	0.15428		0.63047	0.128962	-0.798918	-0.556554	-0.752907	-2.45463		0.770736
10	Ikbip	1303	2311	396	86	53	362	80	224	459	220			50	56	10	Ikbip	0.360619	0.820248	0.129496	0.264706	0.675477		0.472222	-0.826198	2.19005	-2.74894	-1.47393	1.05759		-0.160465
10	Slc25a3	2590	3640	1133	2431	2046	2415	1792	2123	2188	2785	711	822	612	823	10	Slc25a3	0.415757	0.318003	0.45866	0.457748	0.44	0.463844	0.426583	-0.490826	-1.10072	-0.239109	-0.244408	-0.347923	-0.209015	-0.426757
10	Tmpo	294	278	316	977	440	328	196	348	821	544	252	149	218	236	10	Tmpo	0.513937	0.244788	0.572727	0.360806	0.601317	0.627792	0.480263	0.0804498	-1.62535	0.422691	-0.825031	0.592882	0.754175	-0.113956
10	RMST_1									21	97					10	RMST_1					0.183333							-2.15528
10	AC122335.2					47	13	32	31	196	282					10	AC122335.2			0.774194	0.507692	0.410417					1.77761	0.0443941	-0.522606
10	Elk3	1907	1037	542	657	349	192	198	71	632	233					10	Elk3	0.647658	0.452123	0.644567	0.734317	0.730104			0.878255	-0.277135	0.858754	1.4667	1.4357
10	Lta4h	488	625	488	868	350	476	207	393	342	854	96	110	380	607	10	Lta4h	0.438565	0.360088	0.423913	0.345515	0.286311	0.466346	0.385238	-0.356328	-0.829522	-0.442518	-0.921612	-1.31772	-0.194503	-0.67428
10	Hal													102	0	10	Hal							0.990385							6.6865
10	Snrpf									23	23					10	Snrpf					0.5							0
10	Ntn4	191	112			254	0	112	99	199	44					10	Ntn4	0.629508		0.996094	0.530516	0.816327			0.764784		7.99435	0.176323	2.152
10	Usp44					47	46	65	94	33	66	10	55	303	83	10	Usp44			0.505263	0.409938	0.336634	0.164179	0.783505			0.0303736	-0.525461	-0.978626	-2.34792	1.85561
10	Metap2	2464	2270	3557	3228	3951	3116	2181	1846	3213	3101	1223	905	2156	1830	10	Metap2	0.520481	0.524238	0.559061	0.541574	0.508866	0.574648	0.540873	0.11826	0.139979	0.342425	0.240467	0.0511712	0.434021	0.236394
10	AC122901.1			0	362											10	AC122901.1		0.00274725							-8.50383
10	Fgd6	32	56			104	130	69	40	23	347			71	0	10	Fgd6	0.366667		0.444915	0.630631	0.0645161		0.986301	-0.788496		-0.319177	0.771731	-3.85798		6.16993
10	Nr2c1	85	155			260	113	161	82	44	68					10	Nr2c1	0.355372		0.696	0.661224	0.394737			-0.859137		1.19502	0.964811	-0.616671
10	Ndufa12	1500	3171	1168	3951	2172	4058	1019	1986	1257	4025	329	917	3154	2519	10	Ndufa12	0.321207	0.228276	0.348684	0.339209	0.238077	0.264423	0.555947	-1.07947	-1.75731	-0.901436	-0.962023	-1.67822	-1.47603	0.324216
10	Tmcc3					21	94	26	61	21	45					10	Tmcc3			0.188034	0.303371	0.323529					-2.11042	-1.19931	-1.06413
10	Cep83os					25	128			0	42					10	Cep83os			0.167742		0.0227273					-2.31079		-5.42626
10	AC153506.1					0	106									10	AC153506.1			0.00925926							-6.74147
10	Cep83	193	157	76	0	201	165	105	170	132	267	35	33	168	188	10	Cep83	0.551136	0.987179	0.548913	0.382671	0.331671	0.514286	0.472067	0.296132	6.26679	0.283172	-0.689932	-1.01081	0.0824622	-0.161363
10	Plxnc1	0	44					16	33	21	214					10	Plxnc1	0.0217391			0.333333	0.092827			-5.49185			-1	-3.28876
10	Cradd			666	6769	374	1364	300	753	299	485			465	1143	10	Cradd		0.0896867	0.215517	0.285308	0.381679		0.289441		-3.3434	-1.86394	-1.3248	-0.695994		-1.29569
10	AC153366.1					0	69	1	107							10	AC153366.1			0.0140845	0.0181818						-6.12928	-5.75489
10	Socs2	299	429	2584	1046	982	1172	454	769	876	789	228	197	674	843	10	Socs2	0.410959	0.711729	0.455937	0.371429	0.526095	0.5363	0.444371	-0.519374	1.3039	-0.25494	-0.758992	0.150724	0.209847	-0.322355
10	Mrpl42	2005	1274	1183	1824	2519	1532	2627	1800	3260	2872	1336	1198	2908	2104	10	Mrpl42	0.611399	0.393486	0.621762	0.593362	0.531627	0.527208	0.580176	0.653824	-0.624227	0.717066	0.545167	0.182756	0.157168	0.466703
10	Ube2n	146	175	158	115	204	336	151	164	296	380	48	59	185	223	10	Ube2n	0.455108	0.578182	0.378229	0.479495	0.438053	0.449541	0.453659	-0.259759	0.454902	-0.717125	-0.118395	-0.359328	-0.292181	-0.268196
10	Nudt4	1149	1829	860	306	2042	1028	1168	580	2144	1092	768	492	1063	1088	10	Nudt4	0.385906	0.737158	0.665039	0.668	0.662446	0.60935	0.494194	-0.67021	1.48777	0.989446	1.00866	0.972684	0.641396	-0.0335058
10	AC160863.2					43	74			360	285	64	81	15	74	10	AC160863.2			0.369748		0.55796	0.442177	0.175824			-0.769387		0.335984	-0.335184	-2.22882
10	Eea1	207	236	40	116	100	136	139	155	194	225	30	85	89	216	10	Eea1	0.467416	0.259494	0.42437	0.472973	0.463183	0.264957	0.29316	-0.188304	-1.51281	-0.439821	-0.156119	-0.212849	-1.47207	-1.2697
10	Btg1	200	326	106	219	281	408	111	293	266	454	32	38	164	148	10	Btg1	0.380682	0.327217	0.408104	0.275862	0.369806	0.458333	0.525478	-0.702095	-1.03989	-0.536406	-1.39232	-0.769027	-0.241008	0.147154
10	Dcn	88	93	2632	5117	2332	2362	1560	1088	694	944					10	Dcn	0.486339	0.339698	0.496806	0.589057	0.42378			-0.0788554	-0.958873	-0.0184333	0.519467	-0.443301
10	Atp2b1	950	1295	734	476	585	513	552	438	1216	887	129	82	294	306	10	Atp2b1	0.423231	0.606436	0.532727	0.55746	0.578147	0.610329	0.490033	-0.446548	0.623755	0.189132	0.333059	0.454698	0.647328	-0.0575237
10	Poc1b			0	236	36	37									10	Poc1b		0.00420168	0.493333						-7.88874	-0.0384741
10	Galnt4	256	850			53	215			66	175					10	Galnt4	0.231949		0.2		0.27572			-1.72739		-2		-1.39334
10	Dusp6	634	471	888	390	511	443	432	446	704	562	39	21	133	182	10	Dusp6	0.573622	0.694531	0.535565	0.492045	0.555994	0.645161	0.422713	0.42797	1.18501	0.205584	-0.0459078	0.324488	0.862496	-0.449611
10	Kitl	5	183	146	735	4	55	3	131	66	442	14	30			10	Kitl	0.0315789	0.166478	0.0819672	0.0294118	0.131373	0.326087		-4.9386	-2.32389	-3.48543	-5.04439	-2.72507	-1.04731
10	Tmtc3	206	1592	7	1063	92	641	39	409	145	831	19	173	134	181	10	Tmtc3	0.115	0.00746269	0.126531	0.0888889	0.149284	0.103093	0.425868	-2.94404	-7.05528	-2.78727	-3.35755	-2.51062	-3.12102	-0.430979
10	Cep290	157	596	68	1055	44	324	9	209	169	852	31	117	55	197	10	Cep290	0.209272	0.0613333	0.121622	0.0454545	0.166178	0.213333	0.220472	-1.91781	-3.93587	-2.85244	-4.39232	-2.32701	-1.88264	-1.822
10	Alx1	13	70											47	23	10	Alx1	0.164706						0.666667	-2.34239						1
10	Lrriq1									0	115					10	Lrriq1					0.00854701							-6.85798
10	Slc6a15			42	456	751	371	244	199	347	390	67	154	30	375	10	Slc6a15		0.086	0.669039	0.550562	0.470907	0.304933	0.0761671		-3.40979	1.01543	0.292782	-0.168081	-1.18866	-3.60039
10	Tmtc2	0	46													10	Tmtc2	0.0208333							-5.55459
10	Mettl25	66	67	0	123	232	130	151	141	218	229	190	42	157	32	10	Mettl25	0.496296	0.008	0.64011	0.517007	0.487751	0.816239	0.827225	-0.0213737	-6.9542	0.830763	0.0981804	-0.070703	2.15116	2.25939
10	Ccdc59	1444	1281	1989	959	1047	1239	919	1165	1479	2093	371	620	1016	1145	10	Ccdc59	0.529886	0.674576	0.458042	0.441035	0.414102	0.374622	0.47018	0.172673	1.05166	-0.242701	-0.341862	-0.500664	-0.739291	-0.172287
10	Ptprq	74	56							54	70	22	25			10	Ptprq	0.568182				0.436508	0.469388		0.395929				-0.368387	-0.176878
10	Ppp1r12a	806	465	1206	819	614	728	666	385	1612	1763	397	415	869	971	10	Ppp1r12a	0.633936	0.595461	0.457589	0.633428	0.477643	0.488943	0.472313	0.792239	0.55773	-0.245332	0.789086	-0.129104	-0.0638151	-0.159941
10	Pawr	113	77	135	14	179	145	118	100	216	752	10	35	66	243	10	Pawr	0.59375	0.900662	0.552147	0.540909	0.223711	0.234043	0.215434	0.547488	3.18057	0.302029	0.236606	-1.79495	-1.71049	-1.86465
10	Syt1					5	62			0	132					10	Syt1			0.0869565		0.00746269					-3.39232		-7.05528
10	Nav3	0	134							9	153					10	Nav3	0.00735294				0.0609756			-7.07682				-3.94486
10	E2f7	304	345			153	214	81	291	466	405	49	41	262	164	10	E2f7	0.46851		0.417344	0.219251	0.534937	0.543478	0.614486	-0.181963		-0.481406	-1.83227	0.201943	0.251539	0.672597
10	1700020G17Rik	59	103			111	142	15	41	39	27					10	1700020G17Rik	0.365854		0.439216	0.275862	0.588235			-0.793549		-0.352516	-1.39232	0.514573
10	Csrp2	117	60	51	0	41	28	27	22	72	48			51	7	10	Csrp2	0.659218	0.981132	0.591549	0.54902	0.598361		0.866667	0.951906	5.70044	0.534336	0.283793	0.575115		2.70044
10	Osbpl8					24	37	35	37							10	Osbpl8			0.396825	0.486486						-0.604071	-0.0780025
10	Bbs10	13	36					41	25	77	48			0	67	10	Bbs10	0.27451			0.617647	0.614173		0.0144928	-1.4021			0.691878	0.670692		-6.08746
10	Nap1l1	753	950	1193	1081	1063	1178	696	768	1415	1398	433	452	863	611	10	Nap1l1	0.442229	0.524605	0.474365	0.475443	0.50302	0.48929	0.585366	-0.334881	0.142102	-0.148066	-0.141825	0.0174253	-0.061816	0.4975
10	Phlda1	910	575	941	432	497	372	112	152	167	199			80	25	10	Phlda1	0.612643	0.685091	0.571757	0.424812	0.456522		0.757009	0.661382	1.12136	0.41697	-0.437209	-0.251539		1.63941
10	Krr1	235	627	664	1951	1069	2407	804	1465	1662	2868	690	711	908	718	10	Krr1	0.273148	0.254108	0.307648	0.354469	0.366946	0.492516	0.558354	-1.41198	-1.55353	-1.17022	-0.864824	-0.78676	-0.0431915	0.338289
10	Glipr1	4313	3230	187	562	244	990	131	440	310	757	138	297	388	260	10	Glipr1	0.571769	0.250333	0.19822	0.230366	0.290926	0.318078	0.598462	0.417045	-1.5824	-2.0161	-1.74024	-1.28528	-1.10023	0.57572
10	Atxn7l3b	874	909	462	517	812	595	410	497	1179	801	243	172	498	308	10	Atxn7l3b	0.490196	0.471967	0.577005	0.452145	0.595358	0.585132	0.617574	-0.0565835	-0.16194	0.447943	-0.277007	0.557113	0.496109	0.691433
10	Tbc1d15	49	140	538	2584	430	1568	265	486	274	414	73	95	429	481	10	Tbc1d15	0.26178	0.172535	0.2155	0.353254	0.398551	0.435294	0.471491	-1.4957	-2.26181	-1.86409	-0.872496	-0.59368	-0.375509	-0.164696
10	Rab21	142	118	331	83	115	109	104	162	42	91			14	105	10	Rab21	0.545802	0.798077	0.513274	0.391791	0.318519		0.123967	0.265054	1.98272	0.0766213	-0.634483	-1.0973		-2.82103
10	Tmem19	912	639	0	1892	3030	1331	712	460	636	330	153	152	145	247	10	Tmem19	0.587894	0.000527983	0.694705	0.607325	0.658058	0.501629	0.370558	0.512543	-10.8865	1.1862	0.629135	0.944462	0.0093987	-0.764372
10	Thap2	232	298	67	447	247	116	113	237	247	240			128	72	10	Thap2	0.43797	0.131783	0.679452	0.323864	0.507157		0.638614	-0.359816	-2.71989	1.08383	-1.06193	0.041307		0.821403
10	Zfc3h1	10	67			55	15	22	25	229	313	35	40	62	63	10	Zfc3h1	0.139241		0.777778	0.469388	0.422794	0.467532	0.496063	-2.62803		1.80735	-0.176878	-0.449131	-0.187627	-0.0227201
10	A130012E19Rik									21	138					10	A130012E19Rik					0.136646							-2.65951
10	Lgr5							33	57	111	355					10	Lgr5				0.369565	0.239316						-0.770518	-1.66838
10	Tspan8					102	100			234	30					10	Tspan8			0.504902		0.883459					0.028289		2.92232
10	Cnot2	121	116	57	110	158	127	97	163	200	417	60	58	53	126	10	Cnot2	0.51046	0.343195	0.554007	0.374046	0.324717	0.508333	0.298343	0.0603726	-0.936435	0.312883	-0.742842	-1.05631	0.0480943	-1.2338
10	5330438D12Rik			77	118	54	602	166	268	286	1446			134	240	10	5330438D12Rik		0.395939	0.0835866	0.383028	0.165513		0.359043		-0.609416	-3.45465	-0.687758	-2.33394		-0.836074
10	Rab3ip	128	145	112	1869	139	442	85	157	224	430	34	72	119	184	10	Rab3ip	0.469091	0.0569844	0.240137	0.352459	0.342988	0.324074	0.393443	-0.178597	-4.04864	-1.66188	-0.877516	-0.937763	-1.06054	-0.624491
10	4933412E12Rik	200	536							30	11					10	4933412E12Rik	0.272358				0.72093			-1.41773				1.36923
10	Best3									0	137					10	Best3					0.00719424							-7.10852
10	Cct2	2490	1862	2473	2645	2563	2527	2002	1725	2546	2680	854	729	1876	1520	10	Cct2	0.572118	0.483203	0.503535	0.537141	0.487184	0.539432	0.552384	0.419097	-0.0969676	0.0203998	0.21473	-0.0739723	0.228028	0.303408
10	Frs2	591	533	52	131	645	542	264	187	505	558	60	41	63	259	10	Frs2	0.525755	0.286486	0.543314	0.584989	0.475117	0.592233	0.197531	0.148757	-1.31647	0.250582	0.49526	-0.143711	0.53842	-2.02237
10	Yeats4	962	1332	2453	556	1293	1460	1405	1221	2140	2009	498	414	989	1025	10	Yeats4	0.419425	0.815012	0.469691	0.535008	0.515779	0.545952	0.491071	-0.469069	2.13939	-0.175119	0.202352	0.0910893	0.265928	-0.0515303
10	Lyz2	0	144	11525	3387	471	253	11007	5228	773	112					10	Lyz2	0.00684932	0.772831	0.650138	0.677958	0.872604			-7.17991	1.76639	0.893958	1.07395	2.77601
10	Lyz1	0	45	4	1002			4	1960							10	Lyz1	0.0212766	0.00496032		0.00254323				-5.52356	-7.64818		-8.61545
10	Cpsf6	1205	999	969	1309	1782	1331	1313	1302	2588	2415	552	565	1605	1603	10	Cpsf6	0.546691	0.425439	0.572392	0.502102	0.517283	0.494191	0.500312	0.27023	-0.43351	0.420713	0.0121282	0.0997745	-0.0335226	0.00179775
10	Mdm1	99	63	148	53	343	122	327	193	468	797	130	170	329	94	10	Mdm1	0.609756	0.73399	0.736617	0.628352	0.370166	0.433775	0.776471	0.643856	1.46428	1.48375	0.757639	-0.766801	-0.38443	1.79647
10	Dyrk2	71	131	0	169	25	26	20	21	22	31					10	Dyrk2	0.352941	0.00584795	0.490566	0.488372	0.418182			-0.874469	-7.40939	-0.0544478	-0.0671142	-0.476438
10	4932442E05Rik					13	66									10	4932442E05Rik			0.17284							-2.25873
10	Grip1os3													0	71	10	Grip1os3							0.0136986							-6.16993
10	AC158686.2									0	98					10	AC158686.2					0.01							-6.62936
10	AC158686.1									87	64					10	AC158686.1					0.575163							0.437064
10	Helb			172	196	546	593	351	370	1469	267	298	101	399	92	10	Helb		0.467568	0.479404	0.48686	0.8458	0.745636	0.811359		-0.187424	-0.118922	-0.0758438	2.45551	1.55158	2.1047
10	Irak3	62	52			30	158	49	74	35	44					10	Irak3	0.543103		0.163158	0.4	0.444444			0.249359		-2.35869	-0.584963	-0.321928
10	Tmbim4	329	376	48	299	222	209	198	234	469	526	56	66	184	199	10	Tmbim4	0.466761	0.140401	0.515012	0.458525	0.471414	0.459677	0.480519	-0.192098	-2.61411	0.0866544	-0.239892	-0.165142	-0.233199	-0.112475
10	Llph	1236	1383	460	991	908	1175	1168	1151	2409	1831	818	685	1624	1722	10	Llph	0.471957	0.317275	0.435971	0.503662	0.568128	0.544186	0.485364	-0.161998	-1.10557	-0.371536	0.0211342	0.395614	0.255655	-0.084483
10	Hmga2	3719	2148			369	472	194	126	643	1088	72	232	63	235	10	Hmga2	0.633839		0.438909	0.60559	0.37161	0.238562	0.213333	0.791637		-0.354315	0.618646	-0.757871	-1.67436	-1.88264
10	1700006J14Rik	148	692			206	276	26	63	72	714					10	1700006J14Rik	0.17696		0.427686	0.296703	0.0926396			-2.21754		-0.420255	-1.24511	-3.29197
10	4930471E19Rik	121	137							18	42					10	4930471E19Rik	0.469231				0.306452			-0.177787				-1.17834
10	Msrb3	1062	4287	0	128			3	48	11	131			4	63	10	Msrb3	0.198654	0.00769231		0.0754717	0.0833333		0.0724638	-2.01216	-7.01123		-3.61471	-3.45943		-3.67807
10	Lemd3					39	69			45	367					10	Lemd3			0.363636		0.111111					-0.807355		-3
10	Wif1									0	234					10	Wif1					0.00423729							-7.87652
10	Gns	2654	3843	1511	892	799	625	1287	1290	1273	1477	110	173	556	554	10	Gns	0.408524	0.62869	0.56101	0.499418	0.462936	0.389474	0.500899	-0.533896	0.759726	0.353837	-0.00335641	-0.214281	-0.648528	0.00518956
10	Rassf3	1	102	0	60	50	70			54	157			4	46	10	Rassf3	0.0190476	0.016129	0.418033		0.258216		0.0961538	-5.6865	-5.93074	-0.477322		-1.52242		-3.23266
10	AC140264.1													0	44	10	AC140264.1							0.0217391							-5.49185
10	Tbk1	165	318	216	72	464	504	254	257	363	224	100	42	42	137	10	Tbk1	0.342268	0.748276	0.479381	0.497076	0.617997	0.701389	0.237569	-0.942373	1.57173	-0.119053	-0.0168738	0.694013	1.23195	-1.68226
10	Xpot	1076	1267	1728	2672	2131	2347	1364	1655	2753	3042	826	856	2344	1194	10	Xpot	0.459275	0.392776	0.475893	0.451837	0.475073	0.491093	0.662429	-0.235536	-0.628522	-0.139225	-0.278802	-0.143966	-0.0514079	0.972577
10	BC048403			0	54	45	175	181	137	145	41	52	23	124	106	10	BC048403		0.0178571	0.207207	0.56875	0.776596	0.688312	0.538793		-5.78136	-1.93587	0.39927	1.79751	1.14296	0.224317
10	Srgap1	27	103	16	238	522	495			81	111			0	69	10	Srgap1	0.212121	0.0664062	0.513248		0.42268		0.0140845	-1.89308	-3.8134	0.0764708		-0.449803		-6.12928
10	Tmem5	1637	1168	847	1040	1255	827	455	670	939	1355	196	218	769	659	10	Tmem5	0.583541	0.448915	0.602687	0.404614	0.409408	0.473558	0.538462	0.48666	-0.295834	0.601134	-0.557279	-0.528625	-0.152735	0.222392
10	Mon2	238	154	0	593	316	218	106	107	223	362			22	255	10	Mon2	0.606599	0.00168067	0.591418	0.497674	0.381601		0.0824373	0.624742	-9.21432	0.533552	-0.0134205	-0.696471		-3.47644
10	Usp15	1070	722	733	310	1917	2111	957	961	1061	1680	476	478	790	1143	10	Usp15	0.59699	0.702392	0.475931	0.498958	0.387167	0.498954	0.408786	0.566891	1.23887	-0.139007	-0.00601124	-0.662536	-0.00603639	-0.532337
10	Slc16a7	62	311							0	315			0	68	10	Slc16a7	0.168				0.00315457		0.0142857	-2.30812				-8.30378		-6.10852
10	Lrig3	59	33	0	329	0	116	62	138	416	1399			0	52	10	Lrig3	0.638298	0.00302115	0.00847458	0.311881	0.229499		0.0185185	0.819428	-8.36632	-6.87036	-1.14166	-1.74731		-5.72792
10	Atp23	581	80	3357	494	587	343	480	143	583	1002	323	104	459	514	10	Atp23	0.877828	0.871529	0.630901	0.7696	0.36799	0.755245	0.471795	2.84503	2.7621	0.773408	1.73997	-0.780281	1.6256	-0.162939
10	Avil			1997	1034	1616	1241	344	428							10	Avil		0.658754	0.565582	0.445736					0.948926	0.380655	-0.314381
10	Tsfm	494	1019	7559	5733	5773	4884	1945	1804	1253	3023	349	627	723	1507	10	Tsfm	0.326733	0.568678	0.541702	0.518795	0.293128	0.357873	0.324373	-1.04307	0.398844	0.241213	0.108513	-1.26992	-0.84341	-1.05857
10	Eef1akmt3			0	67	11	32									10	Eef1akmt3		0.0144928	0.266667						-6.08746	-1.45943
10	Mettl1	220	147	350	267	191	228	141	162	495	295	157	100	211	175	10	Mettl1	0.598916	0.567044	0.456057	0.465574	0.626263	0.610039	0.546392	0.578449	0.389238	-0.254241	-0.198981	0.744743	0.645569	0.268489
10	Cyp27b1					12	66	16	110	0	128					10	Cyp27b1			0.1625	0.132812	0.00769231					-2.36565	-2.70695	-7.01123
10	Cdk4	1284	256	1294	75	1329	318	1431	396	2884	648	668	143	1770	378	10	Cdk4	0.833333	0.944566	0.806549	0.782941	0.816355	0.822878	0.823721	2.32193	4.09081	2.0598	1.85082	2.15228	2.21594	2.22429
10	Tspan31	2874	2290	748	518	1485	1064	957	673	1755	2024	368	313	625	502	10	Tspan31	0.556523	0.590694	0.582517	0.58701	0.464427	0.540264	0.554473	0.327584	0.529231	0.480581	0.507277	-0.205629	0.232856	0.315604
10	Os9	798	652	1171	1402	686	179	321	106	586	477			290	65	10	Os9	0.550275	0.455146	0.792388	0.750583	0.551174		0.815126	0.291113	-0.259542	1.93231	1.58945	0.29635		2.14048
10	B4galnt1	302	189	110	11	51	69	51	27	180	15					10	B4galnt1	0.614604	0.902439	0.42623	0.65	0.918782			0.673318	3.20945	-0.428843	0.893085	3.49985
10	Slc26a10	221	227	112	10	0	93	72	38	103	15					10	Slc26a10	0.493333	0.91129	0.0105263	0.651786	0.866667			-0.0384741	3.36075	-6.55459	0.904422	2.70044
10	Arhgef25	528	782	0	53	35	51			285	217					10	Arhgef25	0.403201	0.0181818	0.409091		0.56746			-0.565745	-5.75489	-0.530515		0.391687
10	Dtx3	164	261	323	307	119	52	154	182	599	361	28	54	26	39	10	Dtx3	0.386417	0.512658	0.693642	0.45858	0.623701	0.345238	0.402985	-0.667101	0.0730635	1.17897	-0.239575	0.728973	-0.923379	-0.567041
10	Pip4k2c	251	455	377	1266	566	357	427	337	483	732	102	206	289	561	10	Pip4k2c	0.355932	0.229787	0.612973	0.558747	0.397699	0.332258	0.340376	-0.85561	-1.74496	0.663389	0.340588	-0.598806	-1.00699	-0.954517
10	Kif5a					94	55	49	88	176	108					10	Kif5a			0.629139	0.359712	0.618881					0.762501	-0.831877	0.699421
10	Dctn2	2197	1542	1863	1915	2083	2380	1005	1071	1458	1151	197	295	895	799	10	Dctn2	0.587543	0.493122	0.466741	0.484119	0.55879	0.40081	0.528302	0.510453	-0.0396957	-0.192212	-0.0916746	0.340839	-0.580097	0.163499
10	Mars	1093	797	3309	1144	1883	1485	1335	1211	1913	1455	544	494	894	956	10	Mars	0.578224	0.742985	0.55905	0.524333	0.567953	0.524038	0.483261	0.455152	1.53148	0.342365	0.14053	0.39458	0.138828	-0.0966312
10	Arhgap9					68	60	89	38	100	123					10	Arhgap9			0.530769	0.697674	0.448889					0.177787	1.20645	-0.295985
10	Gli1							37	24					73	19	10	Gli1				0.603175			0.787234				0.604071			1.88753
10	R3hdm2	112	235	59	37	205	456	138	160	137	588	55	75	218	370	10	R3hdm2	0.323782	0.612245	0.310709	0.463333	0.189821	0.424242	0.371186	-1.06246	0.658963	-1.14955	-0.211976	-2.0936	-0.440573	-0.760488
10	Ndufa4l2			231	1746	250	512	675	846	221	550					10	Ndufa4l2		0.117231	0.328534	0.443861	0.287193				-2.91268	-1.03127	-0.325339	-1.31149
10	Shmt2	2695	2315	1856	1823	2519	2229	2583	1746	2558	3346	992	1088	1951	1527	10	Shmt2	0.537909	0.504482	0.530526	0.596629	0.433288	0.476945	0.56092	0.219185	0.0258681	0.17638	0.564726	-0.387288	-0.133138	0.353309
10	Lrp1	2671	2608	3416	4254	1057	2514	672	967	889	1791			66	25	10	Lrp1	0.505965	0.445386	0.29611	0.410116	0.331842		0.72043	0.0344231	-0.316429	-1.24922	-0.524401	-1.00969		1.36565
10	Stat6	955	1197	0	804	534	257	469	342	354	511	97	120	321	217	10	Stat6	0.443825	0.00124069	0.674653	0.578106	0.409458	0.447489	0.596296	-0.325545	-9.65284	1.05217	0.454452	-0.528325	-0.304153	0.562733
10	Nab2	180	155			58	56			29	69	25	33	42	43	10	Nab2	0.537092		0.508621		0.3	0.433333	0.494253	0.214444		0.049753		-1.22239	-0.387023	-0.0331669
10	Nemp1			0	449	20	72	39	35	91	123	20	64	140	185	10	Nemp1		0.00221729	0.223404	0.526316	0.425926	0.244186	0.431193		-8.81378	-1.79751	0.152003	-0.430634	-1.63005	-0.399607
10	Myo1a					81	17							0	57	10	Myo1a			0.82				0.0169492			2.18763				-5.85798
10	Zbtb39					61	70									10	Zbtb39			0.466165							-0.195551
10	Prim1	128	36	312	975	325	517	262	250	479	500	170	69	391	344	10	Prim1	0.777108	0.242824	0.386256	0.511673	0.489297	0.709544	0.531886	1.80177	-1.64072	-0.66808	0.0673754	-0.0617762	1.28857	0.184257
10	Naca	22	82	0	93	12	381	167	244	135	307	17	53	38	75	10	Naca	0.216981	0.0105263	0.0329114	0.40678	0.306306	0.25	0.33913	-1.85148	-6.55459	-4.87699	-0.544321	-1.17932	-1.58496	-0.962525
10	Ptges3	129	309	127	242	969	483	378	615	1472	569	374	166	398	529	10	Ptges3	0.295455	0.345013	0.667125	0.380905	0.720999	0.691882	0.429494	-1.25376	-0.924813	1.00298	-0.700733	1.36972	1.16704	-0.409604
10	Baz2a	156	114	556	121	1421	1038	762	903	1563	1516	361	315	855	850	10	Baz2a	0.577206	0.820324	0.577814	0.457708	0.507627	0.533923	0.501465	0.449131	2.1908	0.452726	-0.24464	0.0440194	0.196065	0.00845166
10	Rbms2	584	514	306	262	344	385	269	416	247	292	78	95	305	458	10	Rbms2	0.531818	0.538596	0.471956	0.393013	0.45841	0.451429	0.4	0.183864	0.223176	-0.162004	-0.627088	-0.240561	-0.281182	-0.584963
10	Gls2					257	151	147	73	244	171	45	59	150	178	10	Gls2			0.629268	0.666667	0.58753	0.433962	0.457576			0.7633	1	0.510373	-0.383329	-0.245411
10	Spryd4	767	805	1160	729	797	347	353	461	408	595	181	115	232	382	10	Spryd4	0.487929	0.613961	0.696335	0.433824	0.406965	0.610738	0.378247	-0.0696735	0.6694	1.1973	-0.384143	-0.543211	0.649814	-0.717014
10	Mip					0	115	18	42					0	73	10	Mip			0.00854701	0.306452			0.0133333			-6.85798	-1.17834			-6.20945
10	Timeless	26	666	1573	2961	769	1389	1262	2301	2489	3659	1227	824	2012	2538	10	Timeless	0.0389049	0.347002	0.356481	0.354278	0.404878	0.598149	0.442223	-4.62666	-0.912136	-0.852155	-0.866033	-0.555698	0.573845	-0.334913
10	Stat2	5	57			285	224	314	187	192	556			118	80	10	Stat2	0.09375		0.559687	0.626243	0.257333		0.595	-3.27302		0.34609	0.744619	-1.52908		0.554968
10	Pan2	84	259	973	470	522	415	128	264	166	561	52	87	92	172	10	Pan2	0.246377	0.674048	0.556976	0.327411	0.229081	0.375887	0.349624	-1.61298	1.04819	0.330227	-1.03862	-1.75072	-0.731511	-0.895469
10	Cnpy2	1283	2576	1481	1885	1004	1542	1055	1243	2360	2809	794	730	1274	1054	10	Cnpy2	0.332556	0.440024	0.394427	0.45913	0.456585	0.52097	0.54721	-1.00505	-0.347784	-0.618543	-0.236377	-0.251172	0.121083	0.273254
10	Cs	3627	5273	4623	9272	3399	5962	1709	2662	4019	4021	940	1113	2413	2577	10	Cs	0.407549	0.332734	0.363131	0.391036	0.499876	0.457908	0.483574	-0.539723	-1.00389	-0.810504	-0.639056	-0.00071758	-0.243483	-0.0948266
10	Nabp2	160	160	244	63	190	236	139	124	158	158	23	18	66	65	10	Nabp2	0.5	0.79288	0.446262	0.528302	0.5	0.55814	0.503759	0	1.93664	-0.311314	0.163499	0	0.337035	0.0216951
10	Rnf41	515	795	0	324	370	406	293	393	607	468	181	136	277	211	10	Rnf41	0.393293	0.00306748	0.476864	0.427326	0.564531	0.570533	0.567347	-0.625397	-8.3443	-0.13361	-0.422379	0.374483	0.409763	0.391021
10	Smarcc2	123	83	0	185	42	112	67	35	346	333			63	6	10	Smarcc2	0.596154	0.00534759	0.275641	0.653846	0.509545		0.901408	0.561879	-7.53916	-1.39391	0.917538	0.0550876		3.19265
10	Myl6	7481	3904	2850	1240	2072	782	1793	624	4156	1462	698	439	1766	496	10	Myl6	0.657065	0.696725	0.72584	0.741629	0.73968	0.613696	0.780477	0.938101	1.19996	1.40464	1.52125	1.50661	0.667789	1.82998
10	Esyt1	473	374	0	92			41	55	154	34			118	46	10	Esyt1	0.558304	0.0106383		0.428571	0.815789		0.716867	0.337996	-6.53916		-0.415037	2.14684		1.34023
10	Zc3h10	102	334	0	429	372	444	325	348	742	380	210	200	429	564	10	Zc3h10	0.23516	0.00232019	0.45599	0.482963	0.661032	0.512136	0.432161	-1.70152	-8.74819	-0.25463	-0.0983551	0.963571	0.0700475	-0.393914
10	Rpl41	4086	2778	7393	2841	1132	1415	1651	1381	4865	2895	322	486	3630	1601	10	Rpl41	0.595252	0.722352	0.444488	0.544496	0.6269	0.398765	0.693866	0.556476	1.37945	-0.321673	0.257456	0.748675	-0.592388	1.18049
10	Pa2g4	173	1327	157	1666	385	1853	324	1333	381	2540	163	867	1347	1164	10	Pa2g4	0.115846	0.0865753	0.172321	0.195901	0.130688	0.158915	0.536411	-2.9321	-3.39926	-2.26397	-2.03725	-2.73375	-2.404	0.210491
10	Erbb3			739	2477	1713	706	806	433	863	234	83	42	189	61	10	Erbb3		0.229956	0.707972	0.650282	0.786169	0.661417	0.753968		-1.74358	1.27758	0.894874	1.87837	0.966053	1.61566
10	Rps26	5089	4913	7165	5038	12109	4680	5125	4390	5068	5335	5923	1413	6707	3236	10	Rps26	0.508796	0.587136	0.72122	0.538615	0.48717	0.807304	0.67451	0.0507678	0.508031	1.37131	0.223284	-0.0740575	2.06679	1.05123
10	Ikzf4	0	57													10	Ikzf4	0.0169492							-5.85798
10	Suox	13	50			8	40			72	99					10	Suox	0.215385		0.18		0.421965			-1.86507		-2.18763		-0.454032
10	Rab5b	118	61	181	8	232	114	14	32	70	141					10	Rab5b	0.657459	0.95288	0.66954	0.3125	0.333333			0.940621	4.33787	1.0187	-1.1375	-1
10	Cdk2	408	423	977	337	1044	741	579	627	1339	853	527	283	1186	806	10	Cdk2	0.490996	0.743161	0.584779	0.480132	0.610757	0.650246	0.595286	-0.0519634	1.53281	0.494012	-0.114712	0.649925	0.894647	0.556679
10	Pmel	0	59			90	72	33	24	112	224	0	108	176	136	10	Pmel	0.0163934		0.554878	0.576271	0.33432	0.00909091	0.563694	-5.90689		0.31797	0.443607	-0.993602	-6.76818	0.369573
10	Dgka			557	382	710	939	322	406	212	313	16	31	141	108	10	Dgka		0.592986	0.430648	0.442466	0.404175	0.346939	0.565737		0.542921	-0.402811	-0.333495	-0.559911	-0.912537	0.381563
10	Pym1	115	177			333	366	317	268	502	547	157	121	415	473	10	Pym1	0.394558		0.476462	0.541738	0.478592	0.564286	0.467416	-0.617752		-0.135932	0.241421	-0.123617	0.373043	-0.188304
10	Mmp19	189	408							0	98					10	Mmp19	0.317195				0.01			-1.1061				-6.62936
10	Tmem198b	211	321	0	54	25	117	31	92	203	202			20	29	10	Tmem198b	0.397004	0.0178571	0.180556	0.256	0.501229		0.411765	-0.602996	-5.78136	-2.1822	-1.53916	0.00708942		-0.514573
10	Dnajc14	227	222	234	581	366	305	96	204	254	289	43	56	234	141	10	Dnajc14	0.505543	0.287638	0.545319	0.321192	0.46789	0.435644	0.623342	0.0319901	-1.30836	0.262248	-1.07957	-0.185556	-0.373458	0.72677
10	Ormdl2	172	360	520	193	956	881	377	560	675	956	235	230	593	430	10	Ormdl2	0.32397	0.728671	0.520392	0.402556	0.413962	0.505353	0.579512	-1.06123	1.42523	0.11774	-0.569615	-0.501496	0.030894	0.462775
10	Cd63	0	41	41	59	28	32	20	52	14	90	6	39	23	76	10	Cd63	0.0232558	0.411765	0.467742	0.283784	0.141509	0.148936	0.237624	-5.39232	-0.514573	-0.186413	-1.3356	-2.6009	-2.51457	-1.68182
10	Rdh5			2	103	50	24									10	Rdh5		0.0280374	0.671053						-5.11548	1.02857
10	Bloc1s1	26	50	0	188											10	Bloc1s1	0.346154	0.00526316						-0.917538	-7.56224
10	Itga7					27	90			17	129			0	69	10	Itga7			0.235294		0.121622		0.0140845			-1.70044		-2.85244		-6.12928
11	Pisd-ps1	142	1693	541	5686	193	3057	302	3194	386	6197	27	433	170	1983	11	Pisd-ps1	0.0778443	0.0870124	0.0596556	0.0866209	0.0587699	0.0606061	0.0793503	-3.56635	-3.3913	-3.97846	-3.39843	-4.0014	-3.9542	-3.53634
11	Sfi1	151	417	1796	1636	376	1174	405	871	1606	3065	10	42	49	289	11	Sfi1	0.266667	0.523296	0.242912	0.317684	0.34389	0.203704	0.147059	-1.45943	0.134536	-1.64002	-1.10285	-0.931988	-1.96683	-2.53605
11	Eif4enif1	117	148	345	587	171	167	167	171	208	701	39	41	94	109	11	Eif4enif1	0.441948	0.37045	0.505882	0.494118	0.229418	0.487805	0.463415	-0.336525	-0.765044	0.0339473	-0.0339473	-1.74797	-0.0703893	-0.211504
11	Patz1	41	95	134	50	122	169	85	85	280	790	66	64	206	174	11	Patz1	0.304348	0.725806	0.419795	0.5	0.262127	0.507576	0.541885	-1.19265	1.40439	-0.466876	0	-1.49311	0.0437214	0.242276
11	Pik3ip1	10	58	11	77	87	85	242	147	118	148					11	Pik3ip1	0.157143	0.133333	0.505747	0.621483	0.44403			-2.42321	-2.70044	0.0331669	0.715359	-0.324351
11	Limk2	428	227	303	775	1235	717	497	448	549	643	62	68	280	436	11	Limk2	0.652968	0.281481	0.632549	0.525871	0.460637	0.477273	0.391365	0.911944	-1.35199	0.783623	0.14943	-0.227629	-0.131245	-0.637063
11	Rnf185	91	115	222	223	182	251	147	188	374	231	99	84	131	198	11	Rnf185	0.442308	0.498881	0.42069	0.439169	0.617792	0.540541	0.398792	-0.334419	-0.00645502	-0.46158	-0.352789	0.692766	0.234465	-0.592231
11	Smtn	1083	1363	221	319	178	193	275	252	353	722	74	102	159	144	11	Smtn	0.44281	0.409594	0.479893	0.521739	0.328691	0.421348	0.52459	-0.331479	-0.527512	-0.116097	0.125531	-1.03025	-0.457682	0.142019
11	Tug1	674	486	250	376	547	653	463	466	1076	780	194	170	341	493	11	Tug1	0.580895	0.399682	0.455907	0.498389	0.579656	0.532787	0.409091	0.470966	-0.586877	-0.255115	-0.00929774	0.463624	0.189478	-0.530515
11	Morc2a	136	188	50	71	312	347	225	348	281	484	116	146	216	654	11	Morc2a	0.420245	0.414634	0.473525	0.393043	0.367666	0.443182	0.248853	-0.46421	-0.4975	-0.152925	-0.626904	-0.78229	-0.329308	-1.5938
11	4921536K21Rik									33	120					11	4921536K21Rik					0.219355							-1.8314
11	Dusp18	436	671			32	280			695	448			75	57	11	Dusp18	0.394049		0.105096		0.60786		0.567164	-0.620828		-3.09003		0.632372		0.389947
11	Slc35e4	709	399	0	504	42	104	58	99	171	142					11	Slc35e4	0.63964	0.00197628	0.290541	0.371069	0.546032			0.827819	-8.98014	-1.28798	-0.761213	0.266393
11	Tcn2	302	311	40	0	216	92	206	309	1061	585	32	90	190	214	11	Tcn2	0.492683	0.97619	0.7	0.400387	0.644417	0.266129	0.470443	-0.0422282	5.35755	1.22239	-0.582637	0.857811	-1.4634	-0.170764
11	Pes1	1983	1034	3883	1623	3954	2775	2771	1969	5045	2965	1807	1088	3651	2400	11	Pes1	0.657171	0.705156	0.58758	0.584563	0.629805	0.624094	0.603337	0.938781	1.25799	0.51067	0.492732	0.766622	0.731391	0.605051
11	Gal3st1					10	47			0	44					11	Gal3st1			0.186441		0.0217391					-2.12553		-5.49185
11	Sec14l4					16	28	213	145					111	112	11	Sec14l4			0.369565	0.594444			0.497778			-0.770518	0.551642			-0.012824
11	Mtfp1	0	97					217	69	561	276	64	93	87	46	11	Mtfp1	0.010101			0.756944	0.669845	0.408805	0.651852	-6.61471			1.6389	1.02068	-0.532221	0.904843
11	Sec14l2	8	79							3	83			5	40	11	Sec14l2	0.101124				0.0454545		0.12766	-3.152				-4.39232		-2.77259
11	Ccdc157	138	183			0	65	17	149	71	129					11	Ccdc157	0.430341		0.0149254	0.107143	0.356436			-0.404621		-6.04439	-3.05889	-0.852443
11	Sf3a1	1116	701	641	107	1613	1460	1321	1268	2384	2557	578	698	1182	1624	11	Sf3a1	0.614074	0.856	0.524878	0.510228	0.482501	0.453052	0.421296	0.670086	2.57154	0.143684	0.0590301	-0.101027	-0.271729	-0.45799
11	Tbc1d10a	257	1198	86	232	142	387	123	285	139	434	60	126	261	224	11	Tbc1d10a	0.177076	0.271875	0.269303	0.302439	0.243478	0.324468	0.537988	-2.21639	-1.42124	-1.44004	-1.20568	-1.63559	-1.05795	0.219642
11	Gatsl3	100	370	384	325	366	719	443	650	554	1100	164	234	869	739	11	Gatsl3	0.213983	0.541491	0.337626	0.405479	0.335145	0.4125	0.540373	-1.87706	0.239986	-0.972217	-0.552098	-0.988255	-0.510195	0.23349
11	Osm			580	531			215	225							11	Osm		0.522013		0.488688					0.127112		-0.0652915
11	Lif	9	231			0	40	12	119							11	Lif	0.0413223		0.0238095	0.0977444				-4.53605		-5.35755	-3.20645
11	Hormad2			0	794	233	1213	550	1873	699	1827	401	490	643	829	11	Hormad2		0.00125628	0.161602	0.227216	0.276899	0.450168	0.436906		-9.63481	-2.37519	-1.766	-1.38484	-0.288528	-0.366051
11	Mtmr3	352	252	241	251	282	477	162	185	301	664	19	139	124	109	11	Mtmr3	0.582508	0.489879	0.371879	0.467049	0.312306	0.125	0.531915	0.480531	-0.0584167	-0.756209	-0.190431	-1.13881	-2.80735	0.184425
11	Ascc2	806	748	457	1010	850	1030	566	753	665	922	262	98	438	521	11	Ascc2	0.518638	0.311777	0.452179	0.42922	0.419132	0.726519	0.456816	0.107603	-1.14236	-0.276813	-0.411216	-0.470808	1.40956	-0.249829
11	Uqcr10	5144	5851	6231	3465	4708	3927	5436	5524	8594	10407	2796	2577	5599	5600	11	Uqcr10	0.467855	0.642607	0.545212	0.495986	0.452297	0.520372	0.499955	-0.185759	0.846424	0.261626	-0.0231636	-0.276123	0.117628	-0.000257601
11	Zmat5	0	404	38	550	4	496	3	349	78	681	0	178	134	32	11	Zmat5	0.00246305	0.0661017	0.00996016	0.0112994	0.103811	0.00555556	0.803571	-8.66178	-3.82051	-6.63517	-6.45121	-3.10985	-7.48382	2.03242
11	Cabp7	158	196	202	157	188	236	149	135	354	250	112	110	314	77	11	Cabp7	0.446629	0.562327	0.443662	0.524476	0.585809	0.504464	0.801527	-0.309169	0.361555	-0.326501	0.141356	0.500132	0.0257631	2.01381
11	Nf2	134	438	1084	1704	790	1250	477	697	650	1193	225	415	1037	956	11	Nf2	0.235192	0.388889	0.387365	0.406463	0.352846	0.352025	0.520301	-1.70126	-0.652077	-0.661332	-0.546216	-0.875073	-0.880261	0.117216
11	Nipsnap1					22	36			0	187			48	0	11	Nipsnap1			0.383333		0.00529101		0.98			-0.685891		-7.55459		5.61471
11	Thoc5	74	279	87	432	280	364	117	230	215	466	95	123	278	275	11	Thoc5	0.211268	0.168906	0.434985	0.338109	0.316252	0.436364	0.502703	-1.90046	-2.29879	-0.377326	-0.969106	-1.11239	-0.369234	0.0155969
11	Nefh									352	343	192	190	543	116	11	Nefh					0.506456	0.502604	0.822995					0.0372596	0.0150282	2.2171
11	Ap1b1	355	318	351	427	260	422	241	308	421	857	87	145	297	331	11	Ap1b1	0.527407	0.451282	0.381579	0.439201	0.329688	0.376068	0.473016	0.158321	-0.282035	-0.696608	-0.3526	-1.02373	-0.730393	-0.155871
11	Ewsr1	1428	2129	1328	2032	2274	3699	1549	2577	2701	4483	808	1147	3278	3449	11	Ewsr1	0.401517	0.3953	0.380753	0.375484	0.376009	0.413388	0.487294	-0.575848	-0.613269	-0.701659	-0.733984	-0.730759	-0.504911	-0.0733405
11	Rhbdd3	195	363	484	616	243	276	136	300	403	605	80	76	325	454	11	Rhbdd3	0.35	0.440109	0.46833	0.312785	0.4	0.512658	0.417414	-0.893085	-0.347286	-0.183005	-1.13559	-0.584963	0.0730635	-0.480995
11	Emid1	15	47					38	86							11	Emid1	0.25			0.309524				-1.58496			-1.15754
11	Kremen1	376	267	2421	548	883	939	177	441	505	829	20	34	74	97	11	Kremen1	0.584496	0.815214	0.484649	0.287097	0.378743	0.375	0.433526	0.492332	2.14132	-0.0886144	-1.31217	-0.713974	-0.736966	-0.385891
11	Znrf3			28	24	376	485	190	479	320	834	42	211	117	60	11	Znrf3		0.537037	0.436848	0.28465	0.277682	0.168627	0.659218		0.214125	-0.366392	-1.32946	-1.3792	-2.30166	0.951906
11	Xbp1	3027	2501	1735	1319	1343	832	1451	940	1760	2029	497	365	645	873	11	Xbp1	0.547559	0.568063	0.617363	0.60677	0.464521	0.576389	0.425	0.275283	0.395229	0.690145	0.625775	-0.205085	0.444302	-0.436099
11	Ccdc117	142	228	3	399	238	663	321	256	244	324	76	89	569	455	11	Ccdc117	0.384409	0.00990099	0.264673	0.556131	0.429825	0.461078	0.555556	-0.679332	-6.64386	-1.47417	0.325292	-0.407658	-0.225067	0.321928
11	Ankrd36							50	0							11	Ankrd36				0.980769							5.67243
11	Mrps24	2377	1723	1838	1580	2882	2144	4385	3229	4563	3371	1011	937	3439	3292	11	Mrps24	0.579717	0.537719	0.573389	0.575893	0.575101	0.518974	0.510916	0.463989	0.218084	0.426593	0.441372	0.436694	0.109549	0.0630061
11	Urgcp	300	250	16	204	33	82	24	99	157	89	42	52	126	210	11	Urgcp	0.54529	0.0765766	0.290598	0.2	0.637097	0.447917	0.37574	0.262076	-3.59202	-1.28758	-2	0.811928	-0.301656	-0.732415
11	Ube2d-ps	823	391			194	87	454	543	1011	278	153	79	562	185	11	Ube2d-ps	0.677632		0.689046	0.455455	0.783888	0.65812	0.751669	1.07179		1.1479	-0.25774	1.85887	0.944858	1.59783
11	Dbnl	2258	1699	841	1845	3323	2636	2204	1581	1938	2206	601	238	1824	649	11	Dbnl	0.570599	0.313244	0.557625	0.582255	0.46768	0.715815	0.737374	0.41015	-1.13251	0.334023	0.479029	-0.186774	1.33275	1.48938
11	Pgam2	7	54							12	188					11	Pgam2	0.126984				0.0643564			-2.78136				-3.8618
11	Polm	168	304	1026	838	430	1401	270	512	195	533	23	105	133	437	11	Polm	0.35654	0.550375	0.235134	0.345663	0.268493	0.184615	0.234266	-0.851786	0.291693	-1.70173	-0.920666	-1.44599	-2.14296	-1.7087
11	Aebp1	8434	9335	1549	521	65	121	127	262	887	1327					11	Aebp1	0.47465	0.748069	0.351064	0.327366	0.400722			-0.146416	1.57015	-0.886343	-1.03892	-0.580624
11	Pold2	562	491	2403	1510	1301	1779	1114	1506	1196	1638	401	806	1605	1640	11	Pold2	0.533649	0.614049	0.422453	0.425248	0.422073	0.332506	0.49461	0.194477	0.669933	-0.451148	-0.434636	-0.453393	-1.00537	-0.0311033
11	Myl7			53	63	177	83									11	Myl7		0.457627	0.679389						-0.245112	1.08342
11	Gck			0	191	11	99	0	47	115	235			0	98	11	Gck		0.00518135	0.107143	0.0204082	0.329545		0.01		-7.58496	-3.05889	-5.58496	-1.02466		-6.62936
11	Ykt6	989	1102	323	191	738	313	357	349	976	594	294	194	428	432	11	Ykt6	0.473005	0.627907	0.701804	0.50565	0.621501	0.602041	0.49768	-0.155932	0.754888	1.23481	0.0326047	0.715469	0.597241	-0.0133894
11	Camk2b									84	66	43	47	109	122	11	Camk2b					0.559211	0.478261	0.472103					0.343302	-0.125531	-0.161155
11	Nudcd3	376	394	330	1147	279	600	298	329	472	816	216	245	324	350	11	Nudcd3	0.488342	0.2238	0.317821	0.475358	0.366667	0.468683	0.480769	-0.0672881	-1.79422	-1.10194	-0.142321	-0.788496	-0.180963	-0.111031
11	Ddx56	701	1868	170	1644	721	2242	580	1652	1324	3110	495	1333	1578	1860	11	Ddx56	0.273046	0.094163	0.243508	0.260072	0.298693	0.271038	0.459012	-1.41272	-3.26602	-1.63536	-1.50848	-1.23139	-1.42735	-0.237067
11	Tmed4	672	851	1081	1128	414	777	508	405	854	829	148	230	277	175	11	Tmed4	0.441311	0.489371	0.347863	0.556284	0.507418	0.392105	0.612335	-0.340247	-0.061345	-0.906659	0.326186	0.0428131	-0.632581	0.659509
11	Ogdh	372	1620	251	2326	503	2357	310	1152	557	2229	213	590	653	518	11	Ogdh	0.187061	0.0977123	0.176101	0.212432	0.200143	0.265839	0.557545	-2.11964	-3.20698	-2.22607	-1.89041	-1.99871	-1.46555	0.333556
11	Zmiz2			48	113	53	57	62	38	100	64			88	55	11	Zmiz2		0.300613	0.482143	0.617647	0.608434		0.613793		-1.21818	-0.103093	0.691878	0.635844		0.668379
11	Ppia			0	395					0	118					11	Ppia		0.00251889			0.00833333				-8.62936			-6.89482
11	H2afv	721	1236	605	3254	1090	3076	1637	4071	3729	8148	575	1431	2222	2055	11	H2afv	0.368555	0.156954	0.261756	0.286865	0.313999	0.286853	0.519514	-0.776775	-2.42527	-1.49587	-1.3138	-1.12745	-1.31389	0.112668
11	Purb	90	252	199	350	77	189	52	111	177	260	11	46	80	93	11	Purb	0.264535	0.362976	0.291045	0.321212	0.405467	0.20339	0.462857	-1.4752	-0.811471	-1.28445	-1.07943	-0.552173	-1.96963	-0.214739
11	Myo1g			216	1137	488	695	174	229							11	Myo1g		0.160148	0.412658	0.432099					-2.39073	-0.509253	-0.394279
11	Snhg15	6	884	0	861	28	1251	28	691	7	1449	9	396	1645	354	11	Snhg15	0.00784753	0.00115875	0.0226386	0.0402219	0.00548697	0.02457	0.822589	-6.98218	-9.75154	-5.43204	-4.57665	-7.50184	-5.31107	2.21307
11	Ccm2	1283	3607	366	917	593	1472	292	508	506	1866	74	253	296	602	11	Ccm2	0.262469	0.285603	0.287373	0.365337	0.213564	0.227964	0.33	-1.49055	-1.32271	-1.31022	-0.796765	-1.88066	-1.75987	-1.0217
11	Nacad	6	89													11	Nacad	0.0721649							-3.6845
11	Tbrg4	139	455	204	823	279	743	304	447	484	1009	152	356	705	626	11	Tbrg4	0.234899	0.199223	0.273438	0.405046	0.324415	0.3	0.529632	-1.70361	-2.00702	-1.40988	-0.554689	-1.0583	-1.22239	0.171203
11	Adcy1									7	370			132	23	11	Adcy1					0.0211082		0.847134					-5.53528		2.47032
11	Igfbp3	21	814	0	753	29	753	31	402	94	385	7	42	212	263	11	Igfbp3	0.0262843	0.0013245	0.0382653	0.0735632	0.197505	0.156863	0.446541	-5.21122	-9.55842	-4.65153	-3.65464	-2.0226	-2.42626	-0.309684
11	Tns3	6816	7960	1085	761	809	761	783	910	1493	1763	380	497	1279	697	11	Tns3	0.461294	0.587662	0.515267	0.462537	0.458564	0.433447	0.647118	-0.223813	0.511161	0.0881309	-0.216597	-0.23967	-0.386355	0.874845
11	Pkd1l1							48	351	66	492			26	220	11	Pkd1l1				0.122195	0.119643		0.108871				-2.84472	-2.87935		-3.03302
11	Hus1	283	425	217	296	506	1266	690	961	744	1755	352	351	1373	864	11	Hus1	0.4	0.423301	0.285795	0.418028	0.297881	0.500709	0.613667	-0.584963	-0.446135	-1.32136	-0.477351	-1.23698	0.00409275	0.66761
11	Upp1					2626	3335	3234	3880	3334	4255	1375	1422	3541	2769	11	Upp1			0.44055	0.454609	0.439336	0.491604	0.561153			-0.344703	-0.262663	-0.351811	-0.0484552	0.354678
11	Abca13							12	89	0	319			0	99	11	Abca13				0.126214	0.00311526		0.00990099				-2.79141	-8.32193		-6.64386
11	Zpbp					0	72									11	Zpbp			0.0135135							-6.18982
11	Spata48					0	46									11	Spata48			0.0208333							-5.55459
11	Fignl1	236	125	383	328	255	447	328	530	410	1391	165	459	596	629	11	Fignl1	0.652893	0.538569	0.363636	0.382558	0.227953	0.265176	0.486553	0.911463	0.223019	-0.807355	-0.690624	-1.75995	-1.47045	-0.0776209
11	Ddc					16	51			115	124	51	73	70	72	11	Ddc			0.246377		0.481328	0.412698	0.493056			-1.61298		-0.107803	-0.509014	-0.0400774
11	1700042O10Rik			0	610	20	39			37	77	8	52	30	49	11	1700042O10Rik		0.00163399	0.344262		0.327586	0.145161	0.382716		-9.25503	-0.929611		-1.03747	-2.558	-0.68966
11	Grb10			58	0	329	10	411	23	1589	42	24	39	60	116	11	Grb10		0.983333	0.967742	0.944954	0.973668	0.384615	0.342697		5.88264	4.90689	4.10154	5.20855	-0.678072	-0.939627
11	Cobl					81	85	110	201	726	1703	280	687	593	510	11	Cobl			0.488095	0.354633	0.299054	0.28999	0.537557			-0.0687128	-0.863796	-1.2289	-1.29184	0.21714
11	Sec61g	1891	4001	1636	2204	855	1773	817	1658	1393	3086	345	643	1311	2143	11	Sec61g	0.321004	0.42608	0.325475	0.330238	0.311091	0.349495	0.37963	-1.08081	-0.429724	-1.05132	-1.02014	-1.14697	-0.896289	-0.708537
11	Egfr	208	496	473	369	37	362	72	128	281	307					11	Egfr	0.296034	0.561611	0.0947631	0.361386	0.477966			-1.24974	0.357362	-3.2559	-0.821403	-0.127235
11	Egfros							0	92							11	Egfros				0.0106383							-6.53916
11	Plek			931	705			839	985							11	Plek		0.568987		0.460022					0.400662		-0.231198
11	Cnrip1	94	64					0	42	0	227					11	Cnrip1	0.59375			0.0227273	0.00436681			0.547488			-5.42626	-7.83289
11	Wdr92	1279	1262	1300	427	930	1202	488	675	556	1235	190	391	726	408	11	Wdr92	0.503343	0.752458	0.43627	0.419742	0.310653	0.327616	0.639965	0.0192892	1.60394	-0.369784	-0.467189	-1.14993	-1.03728	0.829855
11	Pno1	133	106	263	224	241	341	95	198	363	257	124	87	194	211	11	Pno1	0.556017	0.539877	0.414384	0.325424	0.585209	0.586854	0.479115	0.324622	0.230613	-0.498989	-1.05166	0.496567	0.506353	-0.12059
11	C1d	127	50	72	32	34	66	81	69	98	167	46	15	49	23	11	C1d	0.715084	0.688679	0.343137	0.539474	0.370787	0.746032	0.675676	1.32757	1.14543	-0.936806	0.228269	-0.762961	1.55459	1.05889
11	Etaa1	166	243	123	0	198	191	286	198	1628	1127	527	414	854	656	11	Etaa1	0.406326	0.992	0.508951	0.590535	0.59086	0.559915	0.565476	-0.547033	6.9542	0.0516621	0.528282	0.53022	0.347427	0.380031
11	Spred2	234	249	433	4915	2394	1452	1040	1060	877	1268	68	115	317	421	11	Spred2	0.484536	0.0811215	0.622401	0.495243	0.408943	0.372973	0.42973	-0.0892673	-3.50172	0.720991	-0.0274546	-0.531399	-0.749457	-0.408216
11	Actr2	1093	637	986	1681	1828	1128	790	571	1587	846	176	116	503	439	11	Actr2	0.63164	0.369801	0.618323	0.580337	0.652156	0.602041	0.533898	0.777984	-0.769056	0.69601	0.467663	0.906777	0.597241	0.19592
11	Rab1a	3557	5255	2932	3746	4141	4439	2446	2421	3415	3412	1008	953	2164	2520	11	Rab1a	0.403676	0.439072	0.482638	0.502567	0.50022	0.514009	0.462015	-0.562899	-0.353359	-0.100232	0.0148152	0.00126756	0.080865	-0.219629
11	Cep68	135	548			1076	1066	1280	847	1763	754	133	180	370	391	11	Cep68	0.19854		0.502332	0.601691	0.700278	0.425397	0.486239	-2.0132		0.0134581	0.595134	1.2243	-0.433757	-0.0794345
11	Slc1a4	815	1780			1518	1183	1073	1142	1717	1514	331	126	400	500	11	Slc1a4	0.314209		0.561968	0.484438	0.531395	0.723312	0.444568	-1.12605		0.359453	-0.0898314	0.181412	1.38635	-0.321208
11	Sertad2	815	950	505	329	980	535	421	487	833	760	226	164	411	691	11	Sertad2	0.4618	0.605263	0.646671	0.463736	0.522884	0.579082	0.373188	-0.220876	0.616671	0.87202	-0.209638	0.132151	0.460226	-0.748128
11	Aftph	139	181			229	235	133	105	220	60	47	30	82	59	11	Aftph	0.434783		0.493562	0.558333	0.783688	0.607595	0.58042	-0.378512		-0.037153	0.338169	1.85717	0.630766	0.468149
11	Lgalsl	534	2984	3	1534	143	894	105	770	290	1127	43	156	574	620	11	Lgalsl	0.151989	0.00259909	0.138595	0.120867	0.205074	0.218905	0.480769	-2.48012	-8.58402	-2.63582	-2.86267	-1.95468	-1.83519	-0.111031
11	Vps54	18	39	66	278	488	294	112	74	432	830			56	57	11	Vps54	0.322034	0.193642	0.623724	0.601064	0.342563		0.495652	-1.074	-2.05803	0.72912	0.59136	-0.940481		-0.025091
11	Ugp2	500	793	305	369	306	247	154	123	117	328	20	95	122	164	11	Ugp2	0.386873	0.452663	0.553153	0.555556	0.263982	0.179487	0.427083	-0.664328	-0.273994	0.307899	0.321928	-1.4793	-2.19265	-0.423808
11	Mdh1	1042	1184	1786	1619	1463	1517	1308	1311	1639	1858	480	392	850	1050	11	Mdh1	0.468133	0.524508	0.490946	0.499428	0.468705	0.550343	0.447424	-0.184148	0.141546	-0.0522562	-0.00330262	-0.180831	0.291508	-0.304532
11	Wdpcp	7	35	41	126	55	159	0	119	54	501	4	49	17	94	11	Wdpcp	0.181818	0.248521	0.259259	0.00826446	0.0987433	0.0909091	0.159292	-2.16993	-1.59637	-1.51457	-6.90689	-3.19018	-3.32193	-2.39993
11	Ehbp1					84	134	8	153	99	619			5	117	11	Ehbp1			0.386364	0.0552147	0.138889		0.0483871			-0.667425	-4.09686	-2.63227		-4.29768
11	Tmem17	276	339			471	182	128	154	306	93	21	57	120	108	11	Tmem17	0.448947		0.720611	0.454225	0.765586	0.275	0.526087	-0.295649		1.36694	-0.264897	1.70751	-1.39855	0.150679
11	B3gnt2	124	188	85	34	354	371	345	327	522	421	95	35	206	133	11	B3gnt2	0.398089	0.710744	0.488308	0.513353	0.553439	0.727273	0.607038	-0.596458	1.29698	-0.0674836	0.0770762	0.309568	1.41504	0.627398
11	Commd1	0	53			5	55	44	133	72	757	42	36	11	158	11	Commd1	0.0181818		0.0967742	0.251397	0.087846	0.5375	0.0701754	-5.75489		-3.22239	-1.57424	-3.37623	0.216811	-3.72792
11	Cct4	2935	2909	4683	3393	4129	4967	3543	4130	5224	6564	1754	2261	3393	4236	11	Cct4	0.502224	0.579846	0.453946	0.461759	0.443172	0.436893	0.444765	0.0128328	0.464755	-0.266523	-0.221112	-0.329364	-0.366128	-0.320057
11	Fam161a							8	35	20	217			3	79	11	Fam161a				0.2	0.0878661		0.047619				-2	-3.37587		-4.32193
11	Xpo1	53	99	307	263	330	475	191	260	439	624	119	92	137	264	11	Xpo1	0.350649	0.538462	0.410161	0.423841	0.413146	0.56338	0.342432	-0.888969	0.222392	-0.52413	-0.442943	-0.506353	0.367732	-0.941324
11	Usp34	63	165	69	347	209	692	133	242	318	524	40	44	173	426	11	Usp34	0.278261	0.167464	0.232558	0.355438	0.377962	0.476744	0.289517	-1.37504	-2.31366	-1.72247	-0.858723	-0.718761	-0.134301	-1.29515
11	Ahsa2	382	219	245	230	466	164	249	223	653	321	155	107	243	145	11	Ahsa2	0.635158	0.515723	0.738924	0.527426	0.670082	0.590909	0.625641	0.799841	0.0907655	1.50096	0.158429	1.02223	0.530515	0.740913
11	0610010F05Rik	551	375			374	260	83	224	175	707	10	81	112	156	11	0610010F05Rik	0.594828		0.589623	0.271845	0.199095	0.11828	0.418519	0.553936		0.522841	-1.42146	-2.00817	-2.89812	-0.474442
11	Pex13	117	122	118	82	228	272	190	167	380	271	87	125	85	182	11	Pex13	0.489627	0.589109	0.456175	0.532033	0.583461	0.411215	0.319703	-0.0598715	0.519778	-0.253553	0.185111	0.486184	-0.517848	-1.08944
11	Pus10	441	530	74	858	621	768	404	332	952	913	172	153	254	190	11	Pus10	0.454265	0.0802998	0.44716	0.54878	0.510445	0.529052	0.571749	-0.264665	-3.5177	-0.306069	0.2824	0.060282	0.167842	0.416925
11	Rel	164	160	40	34	88	59			103	52	22	35			11	Rel	0.506135	0.539474	0.597315		0.66242	0.389831		0.0354053	0.228269	0.568843		0.972519	-0.646363
11	Bcl11a							16	47	0	42					11	Bcl11a				0.261538	0.0227273						-1.4975	-5.42626
11	5730522E02Rik									127	226					11	5730522E02Rik					0.360563							-0.826548
11	Fancl	161	148			941	856	427	406	759	1003	313	204	746	308	11	Fancl	0.5209		0.523624	0.512575	0.430839	0.60501	0.707386	0.120681		0.136432	0.072582	-0.401688	0.615141	1.2735
11	Vrk2	107	204	219	2543	192	118	69	112	113	231	48	58	147	51	11	Vrk2	0.345048	0.0795948	0.61859	0.382514	0.32948	0.453704	0.74	-0.924593	-3.53152	0.697639	-0.690896	-1.02509	-0.267933	1.50901
11	Ccdc85a									0	118			0	65	11	Ccdc85a					0.00833333		0.0149254					-6.89482		-6.04439
11	Pnpt1	0	839	0	2083	0	1400	0	907	1	1997	0	600	509	508	11	Pnpt1	0.00118906	0.000479616	0.000713267	0.00110011	0.001	0.00166113	0.500491	-9.71425	-11.0251	-10.4522	-9.82655	-9.96434	-9.23122	0.00283159
11	A630052C17Rik													9	72	11	A630052C17Rik							0.120482							-2.8679
11	Ppp4r3b	0	781	0	1401	0	1060	7	450	19	698	0	188	203	212	11	Ppp4r3b	0.00127714	0.000712758	0.00094162	0.0174292	0.0278164	0.00526316	0.489209	-9.61102	-10.4533	-10.0512	-5.81698	-5.12722	-7.56224	-0.0622843
11	Cfap36	0	355	0	216	0	271	0	164	4	205	3	54	120	70	11	Cfap36	0.00280112	0.00458716	0.003663	0.0060241	0.0236967	0.0677966	0.630208	-8.47573	-7.76155	-8.08746	-7.36632	-5.36457	-3.78136	0.769116
11	Ccdc88a	56	740	1	1036	26	97	18	161	96	1450	27	154	109	173	11	Ccdc88a	0.0714286	0.00192493	0.216	0.104972	0.0626615	0.153005	0.387324	-3.70044	-9.0182	-1.85982	-3.09192	-3.90292	-2.46877	-0.661584
11	Mtif2	48	258	0	944	127	240	35	290	114	613	51	294	183	432	11	Mtif2	0.159091	0.00105708	0.346883	0.110092	0.15775	0.149856	0.298217	-2.4021	-9.88417	-0.912889	-3.01495	-2.4166	-2.50413	-1.23466
11	Rps27a	36	124	1	177	12	227	32	65	17	146	5	51			11	Rps27a	0.228395	0.0111111	0.0539419	0.333333	0.109091	0.103448		-1.75633	-6.47573	-4.13245	-1	-3.02975	-3.11548
11	Rtn4	968	696	747	694	426	504	429	355	1128	1554	314	408	635	298	11	Rtn4	0.581633	0.518365	0.458155	0.547074	0.420641	0.435083	0.680214	0.475338	0.106025	-0.242047	0.272459	-0.461869	-0.376749	1.08888
11	Sptbn1	1201	1973	968	2697	1380	2633	614	1127	777	2637	137	196	372	444	11	Sptbn1	0.378463	0.264249	0.34396	0.35284	0.227752	0.41194	0.45599	-0.715685	-1.47732	-0.931542	-0.875109	-1.7616	-0.513527	-0.25463
11	Acyp2	153	177	0	199	49	65	13	56	34	122			9	87	11	Acyp2	0.463855	0.00497512	0.431034	0.197183	0.221519		0.102041	-0.208947	-7.64386	-0.400538	-2.02554	-1.81323		-3.1375
11	Psme4	72	168	0	62	382	221	390	166	568	521	68	53	146	266	11	Psme4	0.301653	0.015625	0.633058	0.700717	0.52154	0.560976	0.355072	-1.21105	-5.97728	0.786785	1.22732	0.124379	0.353637	-0.861024
11	Asb3									13	79			0	71	11	Asb3					0.148936		0.0136986					-2.51457		-6.16993
11	Erlec1	140	160	75	176	65	38	58	128	166	128			23	81	11	Erlec1	0.466887	0.300395	0.628571	0.31383	0.564189		0.226415	-0.191366	-1.21968	0.758992	-1.12858	0.372477		-1.77259
11	Chac2															11	Chac2
11	Stc2	1	49	0	336	442	326	470	835	398	664	11	105	108	137	11	Stc2	0.0384615	0.00295858	0.575325	0.360367	0.375	0.101695	0.441296	-4.64386	-8.3966	0.438016	-0.827776	-0.736966	-3.14296	-0.34034
11	Bod1	113	52			118	234	197	132	358	576	41	27	165	139	11	Bod1	0.682635		0.336158	0.598187	0.383547	0.6	0.542484	1.10497		-0.981699	0.574074	-0.684587	0.584963	0.245756
11	Cpeb4	35	24	75	25	33	108	36	62	0	44					11	Cpeb4	0.590164	0.745098	0.237762	0.37	0.0217391			0.526069	1.54749	-1.68072	-0.767827	-5.49185
11	Nsg2					0	61	7	45	0	265					11	Nsg2			0.015873	0.148148	0.00374532					-5.9542	-2.52356	-8.05528
11	Snrnp25	59	430	122	1220	127	741	110	493	119	1157	28	237	400	437	11	Snrnp25	0.1222	0.0915179	0.147126	0.183471	0.0938967	0.108614	0.47795	-2.84465	-3.31133	-2.53528	-2.15395	-3.27053	-3.03684	-0.127329
11	Rhbdf1	291	417	0	660	96	541	27	136	165	262			162	33	11	Rhbdf1	0.411268	0.00151057	0.1518	0.169697	0.386946		0.827411	-0.517535	-9.36851	-2.48224	-2.29068	-0.66388		2.26127
11	Mpg	174	1504	72	1578	143	1361	176	1365	345	1990	49	388	813	392	11	Mpg	0.104167	0.0441889	0.0956175	0.114712	0.148053	0.113895	0.674399	-3.10434	-4.43497	-3.24159	-2.94814	-2.52465	-2.95977	1.0505
11	Sh3pxd2b	426	1536	847	1973	678	1881	124	152	302	1348					11	Sh3pxd2b	0.217413	0.300496	0.265131	0.44964	0.183414			-1.84781	-1.21899	-1.47078	-0.291604	-2.1545
11	Ubtd2	0	121			0	230	8	155	0	169					11	Ubtd2	0.00813008		0.00431034	0.0545455	0.00584795			-6.93074		-7.85175	-4.11548	-7.40939
11	Stk10	11	1316	6	1392	7	1104	10	1035	18	965	0	52	21	35	11	Stk10	0.00902935	0.005	0.00718778	0.0105062	0.0192893	0.0185185	0.37931	-6.77808	-7.63662	-7.10983	-6.55738	-5.66795	-5.72792	-0.710493
11	Fbxw11	6	979	0	811	2	1224	0	901	7	2187	9	296	174	501	11	Fbxw11	0.0070922	0.00123001	0.002443	0.00110742	0.00364299	0.0325733	0.258493	-7.12928	-9.66534	-8.6736	-9.81698	-8.0954	-4.89239	-1.52033
11	Npm1	15	7407	16	7881	32	8163	62	9180	108	9168	19	6340	8742	6978	11	Npm1	0.00215517	0.00215217	0.00402586	0.00681523	0.0117482	0.00314416	0.5561	-8.85487	-8.85688	-7.95067	-7.18716	-6.39436	-8.30857	0.325108
11	Ranbp17	14	30			2	195	33	120	52	254	5	70	141	87	11	Ranbp17	0.326087		0.0150754	0.219355	0.172078	0.0779221	0.617391	-1.04731		-6.02975	-1.8314	-2.26643	-3.56478	0.690316
11	Gabrp					0	188	41	144	58	452					11	Gabrp			0.00526316	0.224599	0.115234					-7.56224	-1.78759	-2.94072
11	Kcnip1	0	78													11	Kcnip1	0.0125							-6.30378
11	Lcp2			203	883			0	59							11	Lcp2		0.1875		0.0163934					-2.11548		-5.90689
11	Dock2							1	71							11	Dock2				0.027027							-5.16993
11	Fam196b							0	42							11	Fam196b				0.0227273							-5.42626
11	Spdl1	0	1437	0	830	1	2802	1	1168	1	2016	0	809	1516	680	11	Spdl1	0.000694927	0.00120192	0.000713012	0.00170794	0.000990589	0.00123305	0.690173	-10.4898	-9.6987	-10.4528	-9.19106	-9.978	-9.66178	1.15549
11	Slit3	46	585	0	613			17	178	218	1913			6	227	11	Slit3	0.0742496	0.00162602		0.0913706	0.102672		0.0297872	-3.64017	-9.26209		-3.31389	-3.12759		-5.02554
11	Rars	3016	3615	3123	2838	3197	3270	2205	2241	3545	3388	1164	1143	2335	2780	11	Rars	0.454847	0.523897	0.494358	0.495953	0.511319	0.504547	0.456517	-0.26128	0.138012	-0.0325618	-0.0233535	0.0653329	0.0262429	-0.251563
11	Wwc1	33	156	485	2383	618	1037	292	405	724	638	91	137	255	330	11	Wwc1	0.17801	0.169338	0.373567	0.41917	0.531525	0.4	0.436116	-2.20716	-2.29436	-0.745795	-0.470579	0.182165	-0.584963	-0.370687
11	Mat2b	279	1138	1459	1303	1540	1335	975	799	1323	1457	338	434	797	777	11	Mat2b	0.197322	0.52822	0.535627	0.54955	0.475917	0.437984	0.506345	-2.02427	0.163024	0.205947	0.286881	-0.139088	-0.35973	0.0366186
11	Hmmr	1679	1890	2006	1533	1859	2235	2202	2454	3291	3615	1497	1253	3759	3308	11	Hmmr	0.470456	0.566789	0.454102	0.47295	0.476549	0.544331	0.5319	-0.170688	0.387742	-0.265618	-0.156254	-0.13543	0.2565	0.184337
11	Nudcd2	1788	1511	952	2861	1863	1942	1649	1219	3022	2908	1038	840	1729	1547	11	Nudcd2	0.541957	0.249803	0.489624	0.574913	0.509609	0.55266	0.527761	0.242695	-1.58648	-0.059884	0.435585	0.0554577	0.305018	0.160367
11	Ccng1	5250	4279	2865	3749	2358	2038	1616	1604	1785	1740	657	601	1627	1395	11	Ccng1	0.550939	0.433192	0.53638	0.501862	0.506379	0.522222	0.53836	0.294981	-0.387852	0.210314	0.0107464	0.0368159	0.128324	0.221802
11	Gabra1			27	106	207	170	29	12							11	Gabra1		0.207407	0.548813	0.697674					-1.93411	0.282587	1.20645
11	Gabrb2			0	388											11	Gabrb2		0.0025641							-8.60363
11	Atp10b							85	50	0	135					11	Atp10b				0.627737	0.00729927						0.753839	-7.08746
11	Pttg1	5664	6460	6467	13267	10718	13442	8679	13025	10316	20527	2478	6395	3277	10256	11	Pttg1	0.467178	0.327726	0.44363	0.399889	0.334479	0.279324	0.242187	-0.189682	-1.03656	-0.326685	-0.585627	-0.99257	-1.36741	-1.64572
11	Slu7	228	661	1870	1691	1215	1447	1181	1034	1293	1521	222	372	1100	878	11	Slu7	0.257015	0.525119	0.456456	0.533153	0.459517	0.374161	0.556061	-1.53148	0.14508	-0.251918	0.191599	-0.234131	-0.742132	0.324879
11	C1qtnf2			0	428									0	74	11	C1qtnf2		0.00232558					0.0131579		-8.74483					-6.22882
11	Ccnjl							10	30	182	105					11	Ccnjl				0.261905	0.633218						-1.49476	0.787779
11	Pwwp2a					49	80	32	82	132	177					11	Pwwp2a			0.381679	0.284483	0.427653					-0.695994	-1.33065	-0.420451
11	Ttc1	706	506	882	1933	695	635	331	351	947	795	294	214	816	486	11	Ttc1	0.582372	0.313454	0.522523	0.48538	0.543578	0.578431	0.626534	0.479724	-1.1311	0.130061	-0.0843922	0.252119	0.456378	0.746414
11	Ublcp1	296	818	202	179	439	603	382	522	745	1178	161	281	190	680	11	Ublcp1	0.266129	0.530026	0.421456	0.422737	0.387532	0.364865	0.219037	-1.4634	0.173483	-0.457045	-0.449467	-0.660316	-0.799701	-1.83408
11	Rnf145	592	1194	0	1389	782	986	856	1011	1530	923	292	287	495	344	11	Rnf145	0.331655	0.000718907	0.442373	0.458534	0.623625	0.504303	0.589774	-1.01091	-10.4409	-0.334038	-0.239842	0.72851	0.0248319	0.523744
11	Ebf1	342	263	53	310	0	57	10	38	623	1331			46	1	11	Ebf1	0.565074	0.147945	0.0169492	0.22	0.319018		0.959184	0.377671	-2.52588	-5.85798	-1.82597	-1.09398		4.55459
11	Clint1	550	472	0	419	274	563	159	227	358	568	49	90	74	60	11	Clint1	0.538086	0.0023753	0.327771	0.412371	0.386853	0.35461	0.551471	0.220212	-8.71425	-1.03626	-0.510962	-0.664445	-0.863938	0.298081
11	Lsm11					150	257	154	168	113	137	57	12	22	101	11	Lsm11			0.369193	0.478395	0.452381	0.816901	0.184			-0.772823	-0.124755	-0.275634	2.15754	-2.14886
11	Thg1l	103	289	42	0	80	43	105	231	110	185	29	77	914	251	11	Thg1l	0.263959	0.977273	0.648	0.313609	0.373737	0.277778	0.784062	-1.47947	5.42626	0.880418	-1.13006	-0.744743	-1.37851	1.86035
11	Adam19	54	222					14	132	35	9			11	32	11	Adam19	0.197842			0.101351	0.782609		0.266667	-2.01954			-3.14839	1.848		-1.45943
11	Nipal4	200	105													11	Nipal4	0.654723							0.923131
11	Cyfip2					0	108			44	115			37	140	11	Cyfip2			0.00909091		0.279503		0.212291			-6.76818		-1.36613		-1.89162
11	2310031A07Rik	600	392			375	284	224	215	567	559	154	126	368	282	11	2310031A07Rik	0.604628		0.568835	0.510204	0.503546	0.549645	0.565951	0.612836		0.399771	0.0588937	0.0204641	0.28744	0.382819
11	Havcr2			0	137			22	33							11	Havcr2		0.00719424		0.403509					-7.10852		-0.563901
11	Sgcd	93	134	0	207					39	302			0	101	11	Sgcd	0.41048	0.00478469			0.116618		0.00970874	-0.522227	-7.70044			-2.92125		-6.67243
11	Rack1	2094	1919	1882	1402	2280	2213	1959	2127	2676	2550	786	729	1443	1541	11	Rack1	0.521793	0.573037	0.507453	0.479452	0.51205	0.518787	0.48359	0.125844	0.424518	0.0430112	-0.118644	0.0695542	0.108467	-0.094732
11	Irgm1					151	202	473	149	540	376	87	139	47	22	11	Irgm1			0.428169	0.759615	0.589325	0.385965	0.676056			-0.417408	1.65992	0.521064	-0.669851	1.0614
11	Tgtp1					56	142	5	162					39	53	11	Tgtp1			0.285	0.035503			0.425532			-1.32698	-4.76377			-0.432959
11	Zfp62	163	124			184	161	88	142	190	273			57	54	11	Zfp62	0.567474		0.533141	0.383621	0.410753		0.513274	0.391768		0.191531	-0.684138	-0.520603		0.0766213
11	Mgat1	933	1146	204	159	310	263	82	126	258	152	34	73	23	63	11	Mgat1	0.448823	0.561644	0.54087	0.395238	0.628641	0.321101	0.272727	-0.296371	0.357552	0.236377	-0.613645	0.75942	-1.08017	-1.41504
11	Flt4	123	1038			517	93	84	71							11	Flt4	0.106621		0.846405	0.541401				-3.06678		2.46222	0.239466
11	Cnot6	29	68	0	113	16	73			45	318					11	Cnot6	0.30303	0.00869565	0.186813		0.126027			-1.20163	-6.83289	-2.12199		-2.79385
11	Gfpt2	330	406	0	1070	443	74	643	363	1283	847	389	355	1254	570	11	Gfpt2	0.448509	0.000932836	0.855491	0.638889	0.602251	0.522788	0.687295	-0.298198	-10.0647	2.5656	0.823122	0.598509	0.131597	1.13612
11	Mapk9	120	408	164	154	192	123	40	170	300	237	70	73	181	175	11	Mapk9	0.228302	0.515625	0.608833	0.193396	0.558442	0.489655	0.50838	-1.75709	0.0901978	0.638261	-2.0603	0.338802	-0.0597062	0.048363
11	Rasgef1c													78	64	11	Rasgef1c							0.548611							0.281413
11	Rnf130									0	210					11	Rnf130					0.00471698							-7.7211
11	Tbc1d9b	856	477	85	1900	169	531	309	523	289	182	69	111			11	Tbc1d9b	0.641948	0.0432813	0.242165	0.371703	0.613108	0.384615		0.842285	-4.46628	-1.64589	-0.757299	0.664209	-0.678072
11	Mrnip	0	43	0	95	0	123	0	55	5	104			30	38	11	Mrnip	0.0222222	0.0103093	0.008	0.0175439	0.0540541		0.442857	-5.45943	-6.58496	-6.9542	-5.80735	-4.12928		-0.331206
11	Sqstm1	3569	5151	1449	4611	2541	5946	2718	5144	3105	5660	684	984	1841	2283	11	Sqstm1	0.40931	0.239195	0.299446	0.345753	0.354283	0.41018	0.446437	-0.529209	-1.66934	-1.2262	-0.920095	-0.865999	-0.52402	-0.31029
11	Mgat4b									0	321			0	43	11	Mgat4b					0.00309598		0.0222222					-8.33092		-5.45943
11	Maml1	52	52			14	198	51	140	114	217			27	122	11	Maml1	0.5		0.0700935	0.26943	0.345345		0.18543	0		-3.72973	-1.43911	-0.922694		-2.13516
11	Canx	3355	3718	2275	2934	2708	2691	2019	2057	2818	3389	821	1025	1929	1822	11	Canx	0.474346	0.436768	0.501574	0.495341	0.454018	0.444805	0.514255	-0.148172	-0.36686	0.00908198	-0.0268877	-0.266102	-0.31982	0.0822863
11	Hnrnph1	847	1130	698	1305	1111	763	982	946	2113	1709	473	412	921	1059	11	Hnrnph1	0.428499	0.348628	0.592751	0.509326	0.552824	0.534386	0.465187	-0.415463	-0.901791	0.541512	0.053827	0.305979	0.198745	-0.201226
11	Rufy1	121	72	523	803	180	61	75	93	467	311			140	65	11	Rufy1	0.625641	0.394578	0.744856	0.447059	0.6		0.681159	0.740913	-0.617629	1.54565	-0.306661	0.584963		1.09516
11	Adamts2	449	702	101	63	16	73	18	43	0	231					11	Adamts2	0.390286	0.614458	0.186813	0.301587	0.00429185			-0.6436	0.672425	-2.12199	-1.2115	-7.85798
11	Zfp354c	68	111					0	84	168	411	0	42	97	37	11	Zfp354c	0.381215			0.0116279	0.290878	0.0227273	0.720588	-0.69883			-6.40939	-1.28562	-5.42626	1.36678
11	Zfp879					0	69									11	Zfp879			0.0140845							-6.12928
11	Grm6					0	152	24	393	37	75			17	36	11	Grm6			0.00649351	0.0596659	0.333333		0.327273			-7.25739	-3.9782	-1		-1.03953
11	Zfp454			0	149	372	206	34	72	272	1007					11	Zfp454		0.00662252	0.643103	0.324074	0.213115				-7.22882	0.849545	-1.06054	-1.88452
11	Zfp2					80	83	82	117	83	106			88	154	11	Zfp2			0.490909	0.412935	0.439791		0.364754			-0.0524674	-0.507604	-0.34915		-0.800391
11	Zfp354b			0	324			0	44	0	40					11	Zfp354b		0.00306748		0.0217391	0.0238095				-8.3443		-5.49185	-5.35755
11	Zfp354a	117	271													11	Zfp354a	0.302564							-1.20482
11	Platr20							44	84	22	163			129	72	11	Platr20				0.346154	0.122995		0.640394				-0.917538	-2.83399		0.832543
11	Clk4	309	255	471	793	232	460	268	309	612	618	165	158	234	368	11	Clk4	0.547703	0.372828	0.335735	0.464594	0.497565	0.510769	0.389073	0.276124	-0.750352	-0.984437	-0.204662	-0.0140523	0.0621565	-0.65096
11	Col23a1			0	853					84	328	7	55			11	Col23a1		0.00116959			0.205314	0.125			-9.73809			-1.95255	-2.80735
11	Phykpl	287	352	456	1275	479	797	179	286	198	638			180	190	11	Phykpl	0.449298	0.263705	0.375587	0.385439	0.23747		0.486559	-0.293599	-1.48136	-0.733354	-0.673054	-1.68305		-0.0775829
11	Hnrnpab	943	1091	1422	1357	787	984	724	705	2863	3378	1293	1412	1296	1761	11	Hnrnpab	0.463654	0.511686	0.444444	0.506639	0.458754	0.47802	0.423995	-0.210114	0.0674522	-0.321928	0.0383128	-0.238565	-0.126924	-0.442035
11	Nhp2	1029	1088	2034	1785	2190	1708	1774	1581	2844	2449	1149	1139	2950	2131	11	Nhp2	0.486078	0.532583	0.561795	0.528746	0.537299	0.502183	0.580563	-0.0803596	0.188297	0.358437	0.166069	0.215647	0.0126	0.468996
11	Rmnd5b	188	243	659	635	480	593	312	507	475	329	191	210	301	453	11	Rmnd5b	0.43649	0.509259	0.447442	0.381242	0.590571	0.476427	0.399471	-0.368495	0.0534393	-0.304426	-0.698666	0.528496	-0.136137	-0.588144
11	N4bp3	0	91	104	252	473	704	270	385	668	396	110	153	298	328	11	N4bp3	0.0107527	0.293296	0.402036	0.412481	0.62758	0.418868	0.476115	-6.52356	-1.26875	-0.572736	-0.510308	0.752867	-0.472371	-0.137942
11	D930048N14Rik					0	42	0	45							11	D930048N14Rik			0.0227273	0.0212766						-5.42626	-5.52356
11	Sec24a	340	901	20	228	86	495	169	363	187	561	34	82	215	381	11	Sec24a	0.274336	0.084	0.149228	0.318352	0.250667	0.29661	0.361204	-1.40336	-3.44689	-2.51125	-1.0984	-1.57984	-1.24576	-0.822541
11	Sar1b	770	1171	362	758	599	1392	596	678	785	1600	237	223	514	841	11	Sar1b	0.396809	0.323529	0.301054	0.467868	0.329284	0.515152	0.379514	-0.60417	-1.06413	-1.21516	-0.185681	-1.02637	0.0874628	-0.709248
11	Jade2					26	300	220	218	74	454					11	Jade2			0.0823171	0.502273	0.141509					-3.47873	0.0131155	-2.6009
11	Cdkn2aipnl	503	549	1394	1752	1355	2380	1347	1087	2162	2123	745	525	1825	635	11	Cdkn2aipnl	0.478178	0.443139	0.362858	0.553366	0.504549	0.586478	0.741673	-0.126008	-0.329561	-0.81221	0.309142	0.0262499	0.504113	1.52159
11	Ube2b			155	342	312	406	293	366	511	682	14	35	68	156	11	Ube2b		0.312625	0.434722	0.444781	0.428452	0.294118	0.30531		-1.13666	-0.378866	-0.319964	-0.415742	-1.26303	-1.1861
11	Cdkl3	14	72	0	318	60	117			7	273			17	48	11	Cdkl3	0.170455	0.003125	0.340782		0.0283688		0.268657	-2.28293	-8.31741	-0.951906		-5.09803		-1.44478
11	Ppp2ca	147	221	206	1189	207	679	210	375	369	569	117	90	143	115	11	Ppp2ca	0.4	0.148175	0.234234	0.359455	0.393617	0.564593	0.553846	-0.584963	-2.52326	-1.70895	-0.83349	-0.623437	0.374848	0.311944
11	Skp1a	30	92	173	163	130	254	200	135	399	353	52	88	377	229	11	Skp1a	0.25	0.514793	0.339378	0.596439	0.530504	0.373239	0.621711	-1.58496	0.0853915	-0.96093	0.563589	0.176251	-0.747813	0.716752
11	Tcf7					16	44	32	96	35	69			76	47	11	Tcf7			0.274194	0.253846	0.339623		0.616			-1.40439	-1.55552	-0.959358		0.681824
11	Vdac1	3737	4515	3638	5325	5670	6803	4003	4449	4993	4914	1806	1900	4356	2490	11	Vdac1	0.452871	0.405912	0.454589	0.473622	0.503986	0.487325	0.636244	-0.272779	-0.54951	-0.26278	-0.152363	0.0230044	-0.073162	0.80661
11	9530068E07Rik	3604	4630	3028	2597	2682	1365	1029	983	961	1916	155	257	139	659	11	9530068E07Rik	0.437712	0.538297	0.662633	0.51142	0.334144	0.376812	0.175	-0.361324	0.22144	0.97389	0.0659141	-0.994742	-0.725825	-2.23704
11	Fstl4							0	72	21	213					11	Fstl4				0.0135135	0.0932203						-6.18982	-3.28204
11	Hspa4	1810	1497	2544	1971	2844	2575	2344	2254	3248	3571	1263	1443	2904	2696	11	Hspa4	0.547295	0.563427	0.524811	0.509783	0.476323	0.466765	0.518565	0.273749	0.368006	0.143296	0.0564605	-0.136736	-0.192074	0.107183
11	Zcchc10	141	170	4	167	318	550	247	167	523	663	208	195	533	685	11	Zcchc10	0.453674	0.0289017	0.366667	0.596154	0.441077	0.516049	0.437705	-0.268105	-5.07039	-0.788496	0.561879	-0.341616	0.0926493	-0.361369
11	Aff4	260	185	21	21	85	148	77	223	246	552	31	66	95	129	11	Aff4	0.583893	0.5	0.365957	0.258278	0.30875	0.323232	0.424779	0.488747	0	-0.792904	-1.52195	-1.16277	-1.06609	-0.437405
11	Uqcrq			114	47	49	32			60	46					11	Uqcrq		0.705521	0.60241		0.564815				1.26053	0.599462		0.376148
11	Shroom1	116	353													11	Shroom1	0.248408							-1.59724
11	Sowaha									1	57					11	Sowaha					0.0333333							-4.85798
11	2008-09-01	1480	2371	455	467	91	410	136	280	655	1076					11	2008-09-01	0.384376	0.493506	0.182903	0.327751	0.378534			-0.679532	-0.0374747	-2.15943	-1.03639	-0.715251
11	Kif3a	204	720	0	1294	131	448	328	209	542	756	174	208	398	874	11	Kif3a	0.221382	0.000771605	0.227194	0.61039	0.417692	0.455729	0.313187	-1.81438	-10.3387	-1.76618	0.647698	-0.479341	-0.256148	-1.13289
11	Il4	44	84													11	Il4	0.346154							-0.917538
11	Rad50	321	430	1262	1189	535	1488	865	1089	1298	2206	328	551	580	766	11	Rad50	0.427623	0.51488	0.264691	0.44274	0.370508	0.373439	0.431009	-0.420627	0.0858931	-1.47404	-0.331889	-0.764685	-0.746581	-0.400688
11	Irf1	221	141			623	1219	1170	1066	943	395	227	115	473	876	11	Irf1	0.60989		0.338395	0.523235	0.704478	0.662791	0.350851	0.644669		-0.967263	0.134181	1.25329	0.974909	-0.88769
11	Slc22a5					35	63	63	77	111	253			45	93	11	Slc22a5			0.36	0.450704	0.306011		0.328571			-0.830075	-0.285402	-1.18133		-1.03103
11	Slc22a21	0	84			51	186			3	170			7	141	11	Slc22a21	0.0116279		0.217573		0.0228571		0.0533333	-6.40939		-1.84645		-5.41785		-4.14975
11	P4ha2	1389	1732	822	499	365	902	357	233	927	406			97	97	11	P4ha2	0.445085	0.622071	0.288416	0.60473	0.695131		0.5	-0.318187	0.718964	-1.30288	0.613451	1.1891		0
11	Acsl6			68	144	379	333									11	Acsl6		0.32243	0.532213						-1.07138	0.186151
11	Fnip1	11	34			49	73	28	66	79	228			28	144	11	Fnip1	0.255319		0.403226	0.302083	0.2589		0.166667	-1.54432		-0.565597	-1.20811	-1.51728		-2.32193
11	Rapgef6	75	190	0	137	125	327	84	248	356	700	18	40	81	317	11	Rapgef6	0.284644	0.00719424	0.277533	0.254491	0.337429	0.316667	0.205	-1.3295	-7.10852	-1.38027	-1.55061	-0.97349	-1.10962	-1.95533
11	Cdc42se2	1865	3135	46	47	2493	1767	1838	2241	3875	4495	1260	1437	2068	2613	11	Cdc42se2	0.373051	0.494737	0.585171	0.450625	0.462972	0.46721	0.441811	-0.748977	-0.0303736	0.496343	-0.285865	-0.214073	-0.189495	-0.337325
11	Lyrm7	33	305	128	312	319	637	259	339	578	728	205	184	39	478	11	Lyrm7	0.1	0.291855	0.334029	0.433333	0.442661	0.526854	0.0770713	-3.16993	-1.27879	-0.995485	-0.387023	-0.332355	0.155119	-3.58195
11	Hint1	0	1551	25	5647	0	2131	43	1473	77	3307	2	435	861	432	11	Hint1	0.000643915	0.00458231	0.000468823	0.0289855	0.023036	0.00683371	0.665637	-10.5999	-7.76308	-11.058	-5.06609	-5.40634	-7.18322	0.993321
11	Gpx3	761	555	204	178	182	98	351	251	1225	1082			183	159	11	Gpx3	0.578149	0.533854	0.648936	0.582781	0.530966		0.534884	0.454706	0.195664	0.886343	0.482152	0.178926		0.201634
11	Tnip1	344	309	1849	2189	2318	1499	855	581	431	949	148	185	319	291	11	Tnip1	0.526718	0.457921	0.607227	0.595271	0.31259	0.444776	0.522876	0.154328	-0.243406	0.62854	0.556592	-1.1369	-0.31999	0.132104
11	Anxa6	12808	14540	11759	9540	8758	9516	1776	3150	2147	3411	718	898	1516	675	11	Anxa6	0.468336	0.552087	0.479262	0.360593	0.386331	0.444376	0.691746	-0.182969	0.301676	-0.119741	-0.826366	-0.667624	-0.322329	1.16613
11	Ccdc69					0	111									11	Ccdc69			0.00884956							-6.80735
11	Slc36a2									0	510					11	Slc36a2					0.00195312							-8.99718
11	Slc36a1	121	1144			0	43	219	494	18	357	9	183	29	88	11	Slc36a1	0.0962904		0.0222222	0.307692	0.0503979	0.0515464	0.252101	-3.23039		-5.45943	-1.16993	-4.23589	-4.20163	-1.56884
11	Fat2															11	Fat2
11	Sparc	16903	15522	6085	3968	1760	2679	1518	1921	5633	7033	701	738	931	1140	11	Sparc	0.521294	0.605271	0.396532	0.441441	0.444743	0.487162	0.44959	0.122957	0.616719	-0.605838	-0.339486	-0.320186	-0.0741033	-0.291897
11	Atox1	3597	5801	3442	5820	2677	5056	3307	5309	2833	5674	652	1228	2724	3286	11	Atox1	0.382766	0.371654	0.346218	0.383848	0.333059	0.346971	0.45326	-0.689355	-0.757601	-0.917126	-0.682753	-1.00178	-0.91233	-0.270515
11	G3bp1	3020	4762	3008	4027	4330	8852	3564	6067	7495	11470	2529	2942	6417	6595	11	G3bp1	0.388104	0.427597	0.328504	0.370082	0.395213	0.462269	0.493161	-0.656844	-0.42078	-1.03147	-0.767319	-0.613798	-0.21815	-0.0394676
11	Glra1			155	789					0	304					11	Glra1		0.164905			0.00326797				-2.34031			-8.25267
11	Fam114a2	1059	2082	4368	2395	3321	2389	1588	1650	3006	3191	563	610	1430	916	11	Fam114a2	0.337257	0.645824	0.581583	0.490432	0.485078	0.48	0.609455	-0.974599	0.866675	0.475041	-0.055221	-0.0861358	-0.115477	0.64203
11	Mfap3	1590	1684	1166	955	1583	1027	751	527	803	1903	108	314	580	483	11	Mfap3	0.485653	0.549694	0.606432	0.5875	0.296898	0.257075	0.54554	-0.0828148	0.287722	0.623732	0.510195	-1.24377	-1.53102	0.263531
11	2010001A14Rik	264	263			1	53	103	90	43	213			19	109	11	2010001A14Rik	0.500945		0.0357143	0.533333	0.170543		0.153846	0.00545443		-4.75489	0.192645	-2.28204		-2.45943
11	Sap30l															11	Sap30l
11	Larp1	99	229	149	6	739	400	264	241	629	511	145	116	181	213	11	Larp1	0.30303	0.955414	0.648554	0.522682	0.551664	0.555133	0.459596	-1.20163	4.42146	0.883923	0.130985	0.299208	0.31946	-0.233672
11	Cnot8	1193	856	601	641	1971	1278	819	937	2651	1494	848	560	1248	666	11	Cnot8	0.582155	0.483923	0.606583	0.466439	0.639498	0.602128	0.651879	0.478436	-0.0928098	0.624643	-0.193964	0.826935	0.597764	0.905015
11	Gemin5	488	710	1052	1327	1014	1344	962	1035	2450	1782	632	587	1673	1606	11	Gemin5	0.4075	0.442251	0.430085	0.481741	0.578885	0.518428	0.51021	-0.540015	-0.33475	-0.406126	-0.105416	0.459064	0.106389	0.0589296
11	Mrpl22	268	147	468	488	206	200	188	122	294	222	116	96	196	196	11	Mrpl22	0.645084	0.489562	0.507353	0.605769	0.569498	0.546729	0.5	0.862009	-0.0602465	0.0424353	0.619728	0.403671	0.270452	0
11	Irgm2					96	27	352	137	568	327					11	Irgm2			0.776	0.718941	0.634337					1.79256	1.355	0.794733
11	Zfp692	209	84	604	0	470	543	411	268	621	396	126	93	253	178	11	Zfp692	0.711864	0.99835	0.464039	0.604993	0.610402	0.574661	0.586605	1.30485	9.24079	-0.20788	0.615038	0.647776	0.434096	0.504869
11	Zfp672	180	148	247	0	221	187			113	42			26	66	11	Zfp672	0.548485	0.995984	0.541463		0.726115		0.287234	0.280677	7.9542	0.239827		1.40663		-1.3112
11	1700047K16Rik					38	54									11	1700047K16Rik			0.414894							-0.495957
11	Sh3bp5l	202	172	865	635	542	450	295	257	400	284	139	120	313	126	11	Sh3bp5l	0.539894	0.576565	0.546278	0.534296	0.584548	0.536398	0.712018	0.230708	0.44534	0.267825	0.198226	0.49264	0.21042	1.30594
11	2810021J22Rik			0	66					89	168					11	2810021J22Rik		0.0147059			0.34749				-6.06609			-0.909026
11	Zfp39	40	57			31	167	13	51	68	172			106	67	11	Zfp39	0.414141		0.16	0.212121	0.285124		0.611429	-0.500429		-2.39232	-1.89308	-1.3261		0.654004
11	Rnf187	1299	2178	1123	2479	1247	2234	1148	1694	1721	3387	452	763	3562	3087	11	Rnf187	0.373671	0.311876	0.358312	0.404008	0.336986	0.372227	0.535709	-0.745155	-1.1417	-0.840657	-0.560906	-0.976349	-0.754062	0.20642
11	Trim17	478	491	374	1572	821	1844	560	1021	1264	1432	37	108	271	157	11	Trim17	0.493306	0.192505	0.308211	0.35439	0.468866	0.258503	0.632558	-0.0386327	-2.06856	-1.16641	-0.865323	-0.179901	-1.52026	0.783682
11	2310058D17Rik	37	49					44	91	37	59					11	2310058D17Rik	0.431818			0.328467	0.387755			-0.395929			-1.03171	-0.658963
11	Trim11	142	661	163	1604	77	528	94	625	151	824	41	178	276	437	11	Trim11	0.17764	0.0927077	0.128501	0.131761	0.155578	0.190045	0.387413	-2.21082	-3.29081	-2.76172	-2.72016	-2.44032	-2.0915	-0.661045
11	Iba57	68	0			329	123	48	59	131	117			129	53	11	Iba57	0.985714		0.726872	0.449541	0.528		0.706522	6.10852		1.41213	-0.292181	0.161751		1.26748
11	Guk1	1398	906	1177	580	1555	1248	1108	1085	2344	2307	551	500	1103	1084	11	Guk1	0.606678	0.669699	0.554724	0.505239	0.503976	0.524217	0.50434	0.625222	1.01973	0.317069	0.0302353	0.0229447	0.139858	0.0250451
11	Mrpl55	161	169	558	560	314	384	244	227	449	361	98	141	277	239	11	Mrpl55	0.487952	0.499107	0.45	0.51797	0.554187	0.410788	0.53668	-0.0695409	-0.00515249	-0.289507	0.103748	0.313935	-0.52039	0.21205
11	Arf1			0	324	0	69	53	43	61	148			575	612	11	Arf1		0.00306748	0.0140845	0.55102	0.293839		0.484441		-8.3443	-6.12928	0.295456	-1.26497		-0.0898183
11	Wnt9a	18	95							8	59					11	Wnt9a	0.165217				0.130435			-2.33703				-2.73697
11	Snap47	88	793	154	724	70	901	46	636	93	1203	29	213	227	269	11	Snap47	0.100793	0.176136	0.0729702	0.0687135	0.0724191	0.122951	0.457831	-3.15726	-2.22571	-3.66724	-3.76056	-3.67903	-2.83458	-0.243926
11	Jmjd4	46	251	49	918	53	414	30	231	102	1102	18	161	280	240	11	Jmjd4	0.157191	0.0515996	0.115139	0.117871	0.0854063	0.104972	0.538314	-2.42269	-4.20006	-2.94208	-2.90378	-3.42072	-3.09192	0.221537
11	Zfp867	111	243	0	285	18	61	27	111	24	259			11	34	11	Zfp867	0.314607	0.00348432	0.234568	0.2	0.0877193		0.255319	-1.12338	-8.15987	-1.70627	-2	-3.37851		-1.54432
11	Zkscan17	48	1139	6	501	84	2180	113	1485	317	2134	29	494	412	314	11	Zkscan17	0.0412111	0.0137525	0.037511	0.07125	0.129637	0.0571429	0.567308	-4.54011	-6.16419	-4.68138	-3.70433	-2.74714	-4.04439	0.39079
11	4933439C10Rik	13	108			8	41	15	50	35	163					11	4933439C10Rik	0.113821		0.176471	0.238806	0.18			-2.96083		-2.22239	-1.67243	-2.18763
11	Nlrp3					0	105									11	Nlrp3			0.00934579							-6.72792
11	Mprip	20	95	5	425	10	239	12	163	45	155					11	Mprip	0.179487	0.0138889	0.0438247	0.0734463	0.227723			-2.19265	-6.14975	-4.44746	-3.65711	-1.76184
11	1700007J10Rik					9	56									11	1700007J10Rik			0.149254							-2.51096
11	Pld6					27	131	12	142	110	141	63	77	81	43	11	Pld6			0.175	0.0833333	0.438735	0.450704	0.650794			-2.23704	-3.45943	-0.355331	-0.285402	0.89812
11	Flcn	190	623	0	622	135	1256	185	1298	282	1582	111	497	208	406	11	Flcn	0.234356	0.00160256	0.097631	0.125253	0.151661	0.183607	0.339286	-1.70797	-9.28309	-3.20831	-2.80403	-2.48379	-2.15265	-0.961526
11	Cops3	237	1166	369	1462	285	1910	253	1132	288	1835	119	672	704	771	11	Cops3	0.169395	0.201855	0.130178	0.183129	0.136	0.151324	0.477319	-2.29377	-1.98333	-2.74024	-2.15725	-2.66742	-2.48757	-0.130978
11	Nt5m	64	336			8	67	9	130	2	136					11	Nt5m	0.161692		0.116883	0.070922	0.0214286			-2.37424		-2.91754	-3.71149	-5.51307
11	Med9	698	802	568	561	750	575	572	521	922	1163	177	339	856	590	11	Med9	0.465379	0.503095	0.565938	0.523288	0.442262	0.343629	0.591851	-0.200108	0.0178585	0.382744	0.134485	-0.334689	-0.933658	0.536137
11	Pemt	35	483			37	361	21	192	30	272	28	92	35	51	11	Pemt	0.0692308		0.095	0.102326	0.101974	0.237705	0.409091	-3.74894		-3.25192	-3.13303	-3.13856	-1.68118	-0.530515
11	Srebf1	0	265	0	235	0	212	1	184	0	261			71	90	11	Srebf1	0.00374532	0.00421941	0.0046729	0.0106952	0.00380228		0.441718	-8.05528	-7.88264	-7.73471	-6.53138	-8.03342		-0.33787
11	Tom1l2	188	514	275	1237	12	204	23	177	14	565	8	35	115	180	11	Tom1l2	0.268466	0.182299	0.059633	0.118812	0.0258176	0.2	0.390572	-1.44619	-2.16527	-3.97904	-2.89077	-5.23777	-2	-0.641865
11	Drc3							44	63					0	47	11	Drc3				0.412844			0.0204082				-0.508147			-5.58496
11	Atpaf2	212	378	621	1431	396	450	86	385	498	426	89	73	334	322	11	Atpaf2	0.359797	0.302824	0.46816	0.183932	0.538877	0.54878	0.509119	-0.831344	-1.20305	-0.183988	-2.14951	0.224804	0.2824	0.0526269
11	Gid4	56	253	19	440	25	385	71	365	92	428	2	131	510	321	11	Gid4	0.18328	0.0433839	0.0631068	0.164384	0.178161	0.0222222	0.613445	-2.15579	-4.46271	-3.89202	-2.34577	-2.20568	-5.45943	0.666263
11	Drg2	180	3276	387	2110	250	3083	132	1754	240	3636	92	1233	1350	985	11	Drg2	0.0523424	0.155262	0.0752624	0.0704449	0.0621454	0.0700829	0.578092	-4.17831	-2.4438	-3.61904	-3.72197	-3.91564	-3.72997	0.454368
11	Myo15															11	Myo15
11	Alkbh5	236	1023	351	1819	412	2423	440	2090	495	2534	84	442	601	584	11	Alkbh5	0.187946	0.162063	0.145576	0.174171	0.163642	0.160985	0.507161	-2.11126	-2.37029	-2.55318	-2.24534	-2.35357	-2.38177	0.0413269
11	Llgl1	1	1336	2	2286	0	2343	3	1361	33	3458	9	411	286	104	11	Llgl1	0.00149365	0.00131004	0.000426439	0.00292826	0.00973375	0.0236967	0.732143	-9.38478	-9.57428	-11.1948	-8.41151	-6.66868	-5.36457	1.45066
11	Flii	0	2765	2	2564	0	2465	0	894	2	1169	0	151	250	315	11	Flii	0.000361402	0.00116822	0.000405351	0.00111607	0.00255754	0.00653595	0.442681	-11.4336	-9.73978	-11.268	-9.80574	-8.60733	-7.24793	-0.332237
11	Top3a	0	264	0	699	0	477	0	375	0	581	0	106	240	305	11	Top3a	0.0037594	0.00142653	0.00208768	0.00265252	0.00171527	0.00925926	0.440585	-8.04985	-9.45121	-8.90087	-8.55459	-9.18488	-6.74147	-0.344499
11	Smcr8	1	360	0	51	0	402	0	109	0	457	0	78	15	98	11	Smcr8	0.00550964	0.0188679	0.00247525	0.00900901	0.00217865	0.0125	0.13913	-7.49586	-5.70044	-8.65464	-6.78136	-8.8392	-6.30378	-2.62936
11	Shmt1	0	738	0	1838	0	2220	0	1408	1	3726	0	1306	688	924	11	Shmt1	0.00135135	0.000543478	0.000450045	0.00070922	0.000536337	0.000764526	0.42689	-9.52943	-10.8447	-11.117	-10.4605	-10.8638	-10.352	-0.424949
11	Dhrs7b	6	996	1	4415	0	2085	0	1178	0	1784	0	473	1184	837	11	Dhrs7b	0.00697211	0.000452694	0.000479157	0.000847458	0.00055991	0.00210526	0.585764	-7.15409	-11.1085	-11.0265	-10.2033	-10.8017	-8.88874	0.499865
11	Tmem11	6	630	0	530	4	625	0	604	0	679	0	401	432	340	11	Tmem11	0.0109718	0.0018797	0.00792393	0.00165017	0.00146843	0.00248139	0.559432	-6.49414	-9.05257	-6.96809	-9.24079	-9.40939	-8.65105	0.344595
11	Natd1	1	368	0	514	1	1148	0	995	1	1032	0	487	181	549	11	Natd1	0.00539084	0.00193798	0.00173762	0.00100301	0.00193237	0.00204499	0.248634	-7.52748	-9.00843	-9.16616	-9.96	-9.01262	-8.93074	-1.59549
11	Map2k3os	0	473	0	336	0	452	0	167	0	244	0	78	39	39	11	Map2k3os	0.00210526	0.00295858	0.00220264	0.00591716	0.00406504	0.0125	0.5	-8.88874	-8.3966	-8.82337	-7.39232	-7.93664	-6.30378	0
11	Map2k3	1	4748	1	3664	0	4120	3	1424	39	1730	10	668	532	463	11	Map2k3	0.000420964	0.000545405	0.000242601	0.00279916	0.0225861	0.0161765	0.534604	-11.2134	-10.8396	-12.0088	-8.47675	-5.43546	-5.92643	0.200011
11	Kcnj12			21	841	364	1242	59	486	0	232					11	Kcnj12		0.025463	0.22699	0.109689	0.0042735				-5.25824	-1.76786	-3.02089	-7.86419
11	Usp22	2508	1872	509	3527	3821	3212	2441	1416	4701	2686	751	647	1639	1044	11	Usp22	0.57257	0.1263	0.543284	0.632806	0.636351	0.537143	0.610801	0.421762	-2.79028	0.250407	0.785223	0.807278	0.214739	0.650193
11	Aldh3a1			15039	6275	8532	4490	2094	1274	560	451	26	25	67	34	11	Aldh3a1		0.705573	0.655175	0.621662	0.553801	0.509434	0.660194		1.26089	0.926016	0.716453	0.311678	0.0544478	0.95818
11	Aldh3a2	1496	578	2553	1121	1822	929	831	929	1102	2352	415	424	712	373	11	Aldh3a2	0.721098	0.694777	0.662187	0.472191	0.319155	0.494649	0.655934	1.37044	1.18669	0.971012	-0.160647	-1.09307	-0.0308793	0.930864
11	Slc47a2	95	14	227	84	147	18	83	35	149	53	47	0	132	4	11	Slc47a2	0.864865	0.728435	0.886228	0.7	0.735294	0.979592	0.963768	2.67807	1.4235	2.96153	1.22239	1.47393	5.58496	4.73335
11	Slc47a1							0	195	269	104	99	83	109	237	11	Slc47a1				0.00507614	0.72	0.543478	0.316092				-7.61471	1.36257	0.251539	-1.11346
11	Mfap4					30	73	124	218	477	526					11	Mfap4			0.295238	0.363372	0.475622					-1.25526	-0.809003	-0.140792
11	Mapk7	167	260			426	356	239	304	298	545	86	92	88	243	11	Mapk7	0.391608		0.544643	0.440367	0.353846	0.483333	0.267267	-0.635589		0.258312	-0.345775	-0.868755	-0.0962153	-1.455
11	B9d1	128	253	110	369	49	278	189	322	314	664	40	79	353	312	11	B9d1	0.336815	0.230769	0.151976	0.37037	0.321429	0.338843	0.530735	-0.977457	-1.73697	-2.48027	-0.765535	-1.078	-0.964376	0.177587
11	Epn2	87	24	224	770	293	376	105	308	465	361	150	209	168	289	11	Epn2	0.778761	0.225904	0.438152	0.255422	0.562802	0.418283	0.368192	1.81558	-1.77681	-0.358748	-1.54354	0.36434	-0.475841	-0.77903
11	Fam83g					157	96	83	61	14	225					11	Fam83g			0.619608	0.575342	0.0622407					0.703868	0.438121	-3.91329
11	Prpsap2	84	171	219	293	203	311	156	183	247	534	104	81	123	171	11	Prpsap2	0.330739	0.428016	0.395349	0.460411	0.316731	0.561497	0.418919	-1.01687	-0.418313	-0.612977	-0.228941	-1.1092	0.356694	-0.472068
11	A530017D24Rik							70	76							11	A530017D24Rik				0.47973							-0.117039
11	Akap10	71	184	0	349	180	197	115	189	204	225	41	30	219	240	11	Akap10	0.280156	0.002849	0.477573	0.379085	0.475638	0.575342	0.477223	-1.36146	-8.45121	-0.129511	-0.711875	-0.140699	0.438121	-0.13153
11	Specc1	1344	1209	1757	1972	740	985	452	182	582	183					11	Specc1	0.526419	0.471187	0.429068	0.712264	0.760104			0.152599	-0.166456	-0.412114	1.30767	1.66379
11	Adora2b	617	307			54	69							68	36	11	Adora2b	0.667387		0.44				0.650943	1.00468		-0.347923				0.899071
11	Zswim7	234	100			241	175	224	319	333	239	133	112	326	279	11	Zswim7	0.699405		0.578947	0.412844	0.581882	0.54251	0.538715	1.21831		0.459432	-0.508147	0.476814	0.24591	0.223864
11	Ttc19	104	83	0	147	24	83	20	80	35	60					11	Ttc19	0.555556	0.00671141	0.229358	0.205882	0.371134			0.321928	-7.20945	-1.74846	-1.94753	-0.760812
11	Ncor1	434	293	308	413	379	469	418	565	1985	969	303	187	1060	482	11	Ncor1	0.596708	0.427386	0.447059	0.425381	0.671854	0.617886	0.687176	0.565199	-0.422024	-0.306661	-0.433852	1.03381	0.693339	1.13533
11	Pigl	119	61	770	894	724	1011	693	1034	1936	2524	721	970	1445	1810	11	Pigl	0.659341	0.462785	0.417386	0.401388	0.43411	0.426462	0.443967	0.952694	-0.215157	-0.481156	-0.576623	-0.382459	-0.427472	-0.324719
11	Ubb	3464	199	3839	738	3796	529	3717	244	3869	547	3539	217	3854	359	11	Ubb	0.94543	0.838611	0.877513	0.938178	0.875962	0.94199	0.914591	4.11478	2.37746	2.8408	3.92367	2.82009	4.02135	3.42066
11	Trpv2	469	251					21	112	49	28	22	28			11	Trpv2	0.65097			0.162963	0.632911	0.442308		0.899237			-2.36075	0.785875	-0.334419
11	Lrrc75aos2							38	85							11	Lrrc75aos2				0.312							-1.14086
11	Mmgt2	396	260			158	291	65	162	109	480	17	47	283	139	11	Mmgt2	0.603343		0.35255	0.28821	0.186125	0.272727	0.669811	0.605089		-0.876942	-1.30433	-2.12853	-1.41504	1.02046
11	Zfp287	0	104					0	218	35	132					11	Zfp287	0.00943396			0.00454545	0.213018			-6.71425			-7.77479	-1.88536
11	Trim16	718	819	0	578	90	253	120	218	106	293			69	38	11	Trim16	0.467186	0.00172414	0.263768	0.355882	0.266833		0.642202	-0.189632	-9.17742	-1.48089	-0.855924	-1.45821		0.843881
11	Fbxw10					26	67									11	Fbxw10			0.284211							-1.33258
11	Tvp23b	1597	1481	1411	1494	1024	1527	906	681	267	1520	138	232	804	791	11	Tvp23b	0.518831	0.485724	0.401488	0.570799	0.149804	0.373656	0.50407	0.108722	-0.0824054	-0.576021	0.411331	-2.50472	-0.745245	0.0234884
11	Tvp23bos									0	65	0	57			11	Tvp23bos					0.0149254	0.0169492						-6.04439	-5.85798
11	Pmp22	2190	2404	1723	1168	0	128	705	556	298	323					11	Pmp22	0.476719	0.595921	0.00769231	0.558987	0.479936			-0.134447	0.560485	-7.01123	0.341991	-0.115848
11	Hs3st3b1	11	87	1	955	188	641	13	119	19	243			20	59	11	Hs3st3b1	0.12	0.00208768	0.227437	0.104478	0.0757576		0.259259	-2.87447	-8.90087	-1.76419	-3.09954	-3.60881		-1.51457
11	Cox10	214	466	314	637	373	607	264	360	173	615	44	118	125	480	11	Cox10	0.315249	0.330535	0.380855	0.423323	0.220253	0.27439	0.207578	-1.11909	-1.0182	-0.701033	-0.446006	-1.82384	-1.40296	-1.93261
11	2810001G20Rik	65	116							325	121			270	56	11	2810001G20Rik	0.360656				0.727679		0.82622	-0.825971				1.41799		2.24926
11	Hs3st3a1			0	1334	288	423	102	118							11	Hs3st3a1		0.000748503	0.40533	0.463964					-10.3826	-0.552995	-0.208317
11	Elac2	1344	855	3997	1611	1505	992	1165	1273	2173	2183	748	524	2049	1892	11	Elac2	0.611086	0.712656	0.602641	0.477869	0.498853	0.587912	0.519909	0.651923	1.31043	0.600856	-0.127797	-0.00662092	0.512648	0.114949
11	Arhgap44	0	286	142	920	124	632	176	410	262	669	11	217	81	683	11	Arhgap44	0.00347222	0.134398	0.164908	0.30102	0.281886	0.0521739	0.10705	-8.16491	-2.68719	-2.34028	-1.21539	-1.3491	-4.18322	-3.0603
11	1700086D15Rik							1	210					0	50	11	1700086D15Rik				0.00938967			0.0192308				-6.7211			-5.67243
11	Myocd	303	64							38	62					11	Myocd	0.823848				0.382353			2.22556				-0.691878
11	Map2k4	230	379	183	1491	182	517	244	337	271	638	48	246	485	364	11	Map2k4	0.378069	0.109785	0.261056	0.42024	0.298573	0.165541	0.571093	-0.718107	-3.01947	-1.50111	-0.464241	-1.23221	-2.33366	0.41306
11	Zkscan6	192	140	0	76	294	169	19	195	63	236	28	67			11	Zkscan6	0.577844	0.0128205	0.634409	0.0925926	0.212625	0.298969		0.452906	-6.26679	0.79518	-3.29278	-1.88874	-1.22948
11	Dnah9									2	111					11	Dnah9					0.026087							-5.22239
11	Shisa6							4	71							11	Shisa6				0.0649351							-3.848
11	Pirt			0	345	47	166	23	69	61	222			62	68	11	Pirt		0.00288184	0.223256	0.255319	0.217544		0.477273		-8.43463	-1.79874	-1.54432	-1.8467		-0.131245
11	Tmem238l					9	260	28	39	0	74					11	Tmem238l			0.0369004	0.42029	0.0131579					-4.70598	-0.463947	-6.22882
11	Tmem220	0	149			40	23	87	178	95	237	13	51			11	Tmem220	0.00662252		0.630769	0.329588	0.287425	0.212121		-7.22882		0.77259	-1.02438	-1.30986	-1.89308
11	Adprm	163	183	0	434	256	498	163	133	360	241	56	70	114	351	11	Adprm	0.471264	0.00229358	0.339947	0.550336	0.598673	0.445312	0.246253	-0.16601	-8.76487	-0.957271	0.291463	0.576992	-0.316857	-1.61394
11	Sco1	256	266	197	97	544	438	316	403	701	861	139	244	739	815	11	Sco1	0.490458	0.668919	0.553862	0.439667	0.448849	0.363636	0.475578	-0.0550714	1.01465	0.312035	-0.349872	-0.296217	-0.807355	-0.141044
11	Myh3					477	249	83	69	10	386			35	300	11	Myh3			0.656593	0.545455	0.0276382		0.106825			0.935083	0.263034	-5.13676		-3.06369
11	Myh13									37	34					11	Myh13					0.520548							0.118644
11	Gas7			125	508	1	106	6	92	65	298			45	43	11	Gas7		0.198425	0.0183486	0.07	0.180822		0.511111		-2.01424	-5.74147	-3.7318	-2.17961		0.0641303
11	Glp2r	588	69	660	432	282	44	342	39	1516	327					11	Glp2r	0.893778	0.604205	0.862805	0.895561	0.822222			3.07284	0.610283	2.65281	3.10014	2.20945
11	Usp43			0	208	111	146	8	41	27	180			0	83	11	Usp43		0.0047619	0.432432	0.176471	0.133971		0.0117647		-7.70736	-0.392317	-2.22239	-2.69249		-6.39232
11	Stx8	117	362	303	549	176	496	153	191	236	905	72	66	58	259	11	Stx8	0.245322	0.355972	0.262611	0.445087	0.207349	0.521429	0.184953	-1.62118	-0.85536	-1.4895	-0.318176	-1.93462	0.123735	-2.13972
11	Ntn1			136	478	365	678	101	149	435	576	18	38	37	56	11	Ntn1		0.222403	0.350239	0.404762	0.430405	0.327586	0.4		-1.80585	-0.891568	-0.556393	-0.404243	-1.03747	-0.584963
11	Pik3r5	4	54	0	161											11	Pik3r5	0.0833333	0.00613497						-3.45943	-7.33985
11	Myh10	1331	1643			20	389	245	655	1716	1553	132	134	198	665	11	Myh10	0.447581		0.0510949	0.272727	0.524916	0.496269	0.230058	-0.303616		-4.21501	-1.41504	0.143904	-0.0215332	-1.74275
11	Ndel1	448	511	447	340	302	388	145	185	212	214	54	23	71	39	11	Ndel1	0.467222	0.567807	0.437861	0.439759	0.497664	0.696203	0.642857	-0.189428	0.393727	-0.360452	-0.349334	-0.0134832	1.1964	0.847997
11	Rpl26	3639	4136	5075	4940	3122	4194	3821	4306	4197	4447	1245	1699	3013	4278	11	Rpl26	0.468047	0.506739	0.426756	0.470169	0.485542	0.422946	0.413273	-0.184647	0.038889	-0.425738	-0.172356	-0.0834546	-0.448231	-0.505594
11	Arhgef15					37	23			31	88	14	27	0	146	11	Arhgef15			0.612903		0.264463	0.348837	0.00675676			0.662965		-1.47573	-0.900464	-7.19967
11	Pfas	1195	351	1431	1174	2345	1377	1658	846	4010	1733	942	552	2601	775	11	Pfas	0.77261	0.54929	0.629968	0.662011	0.698172	0.630348	0.770278	1.76457	0.285371	0.767627	0.96988	1.20986	0.769978	1.74549
11	Ctc1	507	428	1594	3848	1381	1306	1093	862	1674	1656	444	321	696	517	11	Ctc1	0.542156	0.292983	0.513946	0.559019	0.502701	0.580183	0.573663	0.243851	-1.27093	0.0804985	0.34218	0.0155875	0.466745	0.428207
11	Aurkb	1341	1737	5901	635	3155	4147	3018	2329	5097	4351	1119	1381	2254	2753	11	Aurkb	0.435714	0.902723	0.432092	0.564405	0.539471	0.447642	0.45019	-0.373043	3.21411	-0.394319	0.373741	0.228253	-0.303259	-0.288401
11	Vamp2	25	157	185	322	94	275	69	120	136	220	6	36	79	91	11	Vamp2	0.141304	0.365422	0.256065	0.366492	0.382682	0.159091	0.465116	-2.60334	-0.796232	-1.53867	-0.78958	-0.68987	-2.4021	-0.201634
11	Per1	15	109			384	354	285	245	245	280	25	32	51	41	11	Per1	0.126984		0.52027	0.537594	0.466793	0.440678	0.553191	-2.78136		0.117039	0.217357	-0.191912	-0.343954	0.308122
11	Aloxe3			0	99	4	97	26	74							11	Aloxe3		0.00990099	0.0485437	0.264706					-6.64386	-4.29278	-1.47393
11	Alox12b			1359	692	763	1353	448	542	124	275					11	Alox12b		0.662445	0.360718	0.452621	0.311721				0.972679	-0.825583	-0.274237	-1.14274
11	Gucy2e			0	613	2	1437	0	153							11	Gucy2e		0.00162602	0.00208189	0.00645161					-9.26209	-8.90489	-7.26679
11	Cntrob	107	168	70	824	171	149	141	323	306	576	28	72	266	308	11	Cntrob	0.389892	0.0792411	0.534161	0.304721	0.347285	0.284314	0.463542	-0.645992	-3.5385	0.197446	-1.1901	-0.910333	-1.33184	-0.210767
11	Chd3	315	350	55	10	46	44	25	51	74	241	24	56	22	42	11	Chd3	0.473763	0.835821	0.51087	0.333333	0.236593	0.304878	0.348485	-0.151546	2.34792	0.0627358	-1	-1.69004	-1.18903	-0.902703
11	Wrap53	103	281	7	71	70	230	113	95	211	267	69	121	260	216	11	Wrap53	0.26943	0.1	0.235099	0.542857	0.441667	0.364583	0.546025	-1.43911	-3.16993	-1.702	0.247928	-0.338169	-0.801454	0.266355
11	Trp53	1278	1498	486	1457	1933	2113	2044	2209	3662	3881	1576	1685	2938	3096	11	Trp53	0.460403	0.250386	0.477767	0.480611	0.485487	0.483298	0.486912	-0.228984	-1.582	-0.128388	-0.111946	-0.0837744	-0.0964219	-0.075546
11	Sat2									23	23					11	Sat2					0.5							0
11	Fxr2					0	41							0	43	11	Fxr2			0.0232558				0.0222222			-5.39232				-5.45943
11	Mpdu1	238	364	596	690	922	690	564	461	1003	995	204	243	741	537	11	Mpdu1	0.395695	0.463509	0.571871	0.550146	0.502	0.45657	0.579688	-0.610886	-0.210955	0.417645	0.290358	0.0115416	-0.251257	0.463813
11	Eif4a1	3415	957	5204	1334	6357	1378	5229	1144	9234	2195	1077	434	6497	1764	11	Eif4a1	0.780979	0.795872	0.821766	0.820392	0.807891	0.712492	0.786397	1.83421	1.96306	2.20495	2.19146	2.07223	1.30927	1.88033
11	Senp3	265	234	270	445	713	688	575	546	1524	1340	494	538	1637	1382	11	Senp3	0.530938	0.377964	0.508909	0.512912	0.5321	0.478723	0.542205	0.178765	-0.718751	0.0514201	0.074528	0.1855	-0.122857	0.244134
11	Polr2a	83	216	132	366	221	279	118	310	430	774	143	171	249	498	11	Polr2a	0.27907	0.266	0.442231	0.276744	0.35738	0.455696	0.333778	-1.36923	-1.46435	-0.334867	-1.38595	-0.846508	-0.25634	-0.997112
11	Zbtb4	79	47							16	32					11	Zbtb4	0.625				0.34			0.736966				-0.956931
11	Nlgn2							7	41	5	174					11	Nlgn2				0.16	0.0331492						-2.39232	-4.86625
11	Plscr3	526	474	207	429	89	60	102	33	164	137			20	75	11	Plscr3	0.525948	0.326019	0.596026	0.751825	0.544554		0.216495	0.149875	-1.04775	0.561116	1.59904	0.257798		-1.85561
11	Tnk1	4	67	171	505	134	131	61	46	54	97			21	35	11	Tnk1	0.0684932	0.253687	0.505618	0.568807	0.359477		0.37931	-3.76553	-1.55673	0.0324215	0.399607	-0.83335		-0.710493
11	Kctd11	460	343			81	59	63	82	361	233					11	Kctd11	0.572671		0.577465	0.435374	0.607383			0.422358		0.450661	-0.375039	0.629481
11	2810408A11Rik	0	41	0	441	170	192	0	95	173	145					11	2810408A11Rik	0.0232558	0.00225734	0.46978	0.0103093	0.54375			-5.39232	-8.7879	-0.174605	-6.58496	0.253119
11	Neurl4	32	33	0	153			29	52	37	28			15	49	11	Neurl4	0.492537	0.00645161		0.361446	0.567164		0.242424	-0.0430687	-7.26679		-0.82103	0.389947		-1.64386
11	Eif5a					44	39			51	80			22	26	11	Eif5a			0.529412		0.390977		0.46			0.169925		-0.63941		-0.231326
11	Elp5	867	903	905	1973	1021	919	744	447	956	1663	309	442	447	586	11	Elp5	0.489842	0.314583	0.526262	0.624476	0.365128	0.411687	0.43285	-0.0586277	-1.12354	0.151689	0.733742	-0.798065	-0.515038	-0.389862
11	Dvl2	171	267			249	357	252	605	426	897	102	172	307	341	11	Dvl2	0.390909		0.411184	0.294529	0.322264	0.373188	0.473846	-0.639824		-0.518031	-1.26018	-1.07248	-0.748128	-0.151066
11	Acadvl	156	185	52	110	36	28	54	43	44	104	22	24	59	19	11	Acadvl	0.457726	0.323171	0.560606	0.555556	0.3	0.479167	0.75	-0.244538	-1.0665	0.351472	0.321928	-1.22239	-0.120294	1.58496
11	Dlg4	58	158			0	75			62	118					11	Dlg4	0.270642		0.012987		0.346154			-1.43024		-6.24793		-0.917538
11	Asgr2									45	36			12	34	11	Asgr2					0.554217		0.270833					0.314109		-1.42884
11	Slc16a13	81	78			245	155	78	135	32	192			31	222	11	Slc16a13	0.509317		0.61194	0.367442	0.146018		0.12549	0.0537713		0.657112	-0.783682	-2.54806		-2.8009
11	Bcl6b							16	132	0	41					11	Bcl6b				0.113333	0.0232558						-2.96782	-5.39232
11	Alox12													35	13	11	Alox12							0.72							1.36257
11	Alox15													0	119	11	Alox15							0.00826446							-6.90689
11	Pelp1	326	411	493	829	667	931	555	781	1679	1321	652	520	937	849	11	Pelp1	0.44249	0.373112	0.4175	0.415546	0.559627	0.556218	0.524609	-0.333354	-0.7486	-0.480482	-0.492084	0.345739	0.3258	0.142125
11	Cxcl16			0	216	297	302	272	235	217	229					11	Cxcl16		0.00458716	0.49584	0.536346	0.486607				-7.76155	-0.0240055	0.210114	-0.0773057
11	Psmb6	4482	4373	5766	3709	5601	4776	5220	4175	8319	8812	2519	2091	6170	5136	11	Psmb6	0.506153	0.608526	0.539744	0.555603	0.485613	0.546401	0.54572	0.0355113	0.636402	0.229837	0.322204	-0.0830497	0.268541	0.264578
11	Pld2	175	169	0	466	119	153	114	66					24	49	11	Pld2	0.508671	0.00213675	0.437956	0.631868			0.333333	0.0500407	-8.86728	-0.359896	0.779401			-1
11	Mink1	23	53	201	388	136	78	44	141	155	165	15	34	53	50	11	Mink1	0.307692	0.341794	0.634259	0.240642	0.484472	0.313725	0.514286	-1.16993	-0.945415	0.794251	-1.65789	-0.0896372	-1.12928	0.0824622
11	Rnf167	147	34	744	977	938	991	561	688	881	1227	84	282	381	696	11	Rnf167	0.808743	0.432385	0.486277	0.449241	0.418009	0.230978	0.354032	2.08017	-0.392594	-0.079215	-0.293934	-0.47746	-1.73527	-0.867586
11	Eno3	67	71	0	47					73	165					11	Eno3	0.485714	0.0204082			0.308333			-0.0824622	-5.58496			-1.16559
11	Spag7	340	338	1264	451	463	588	470	467	760	763	167	229	341	369	11	Spag7	0.501471	0.73675	0.440646	0.501597	0.499016	0.422111	0.480337	0.00848647	1.48474	-0.344143	0.00921853	-0.00567618	-0.453173	-0.113529
11	Camta2	12	58			62	112	58	65							11	Camta2	0.180556		0.357955	0.472				-2.1822		-0.842899	-0.161751
11	Zfp3					28	101			69	422					11	Zfp3			0.221374		0.141988					-1.81444		-2.59523
11	Rabep1									1	50			38	44	11	Rabep1					0.0377358		0.464286					-4.67243		-0.206451
11	Nup88	748	481	1164	576	843	1061	714	782	1145	1052	298	336	657	730	11	Nup88	0.608448	0.668772	0.442812	0.477303	0.521146	0.470126	0.473722	0.635933	1.01369	-0.331469	-0.131069	0.122102	-0.172603	-0.151784
11	Rpain	197	334	321	0	213	461	274	482	847	1443	154	270	261	287	11	Rpain	0.371482	0.996904	0.316568	0.362797	0.369983	0.36385	0.476364	-0.758661	8.33092	-1.11028	-0.812592	-0.767935	-0.806025	-0.136502
11	C1qbp	203	216	519	738	342	441	277	297	449	402	134	140	239	205	11	C1qbp	0.484561	0.413026	0.436943	0.482639	0.52755	0.48913	0.538117	-0.0891259	-0.507063	-0.365838	-0.100227	0.159145	-0.0627358	0.22039
11	Dhx33	428	819	670	996	733	757	912	867	857	828	318	260	526	240	11	Dhx33	0.343475	0.402278	0.491957	0.512633	0.508595	0.55	0.686198	-0.934646	-0.571281	-0.0464178	0.0729198	0.0496055	0.289507	1.12877
11	Derl2	315	400	90	250	336	158	109	257	114	247	28	30	101	167	11	Derl2	0.440725	0.266082	0.679435	0.298913	0.316804	0.483333	0.377778	-0.343678	-1.46375	1.08372	-1.22987	-1.10871	-0.0962153	-0.719892
11	Mis12	1799	768	1146	2272	1436	724	753	696	1599	1274	339	430	733	431	11	Mis12	0.700662	0.33538	0.664662	0.519642	0.556522	0.440986	0.629503	1.22694	-0.986732	0.987007	0.113406	0.327575	-0.342153	0.764749
11	6330403K07Rik	14	80	0	249					317	452					11	6330403K07Rik	0.15625	0.00398406			0.412451			-2.43296	-7.96578			-0.510484
11	Wscd1									49	94			56	51	11	Wscd1					0.344828		0.522936					-0.925999		0.13245
11	Smtnl2					185	414	132	843	211	1158	94	439	280	690	11	Smtnl2			0.309484	0.136131	0.154632	0.17757	0.289095			-1.15781	-2.66582	-2.45074	-2.2115	-1.29812
11	Ube2g1	35	9	167	5	11	38	36	23	91	2			43	5	11	Ube2g1	0.782609	0.965517	0.235294	0.606557	0.968421		0.88	1.848	4.80735	-1.70044	0.624491	4.9386		2.87447
11	Ankfy1			90	65	89	111			40	28			22	27	11	Ankfy1		0.579618	0.445545		0.585714		0.45098		0.463401	-0.315502		0.499571		-0.283793
11	Cyb5d2	11	45													11	Cyb5d2	0.206897							-1.9386
11	Atp2a3			2020	3871	1695	3517	418	685	40	318					11	Atp2a3		0.342949	0.325278	0.379186	0.113889				-0.93801	-1.05262	-0.711258	-2.95986
11	Haspin			0	53	62	139	51	107	96	164	13	81	54	73	11	Haspin		0.0181818	0.310345	0.325	0.370229	0.145833	0.426357		-5.75489	-1.152	-1.05445	-0.766409	-2.5502	-0.428094
11	Trpv1			0	243	1	56									11	Trpv1		0.00408163	0.0338983						-7.93074	-4.83289
11	Trpv3			125	309	110	238	75	114	37	6					11	Trpv3		0.288991	0.317143	0.397906	0.844444				-1.29884	-1.10645	-0.597563	2.44057
11	Rap1gap2	265	694	552	519	27	242	0	68	1	257			0	96	11	Rap1gap2	0.276795	0.515377	0.103321	0.0142857	0.00769231		0.0102041	-1.38559	0.0887679	-3.11746	-6.10852	-7.01123		-6.59991
11	Ccdc92b									33	53			52	0	11	Ccdc92b					0.386364		0.981481					-0.667425		5.72792
11	Cluh	1219	575	877	1141	835	771	367	395	724	973	297	255	499	631	11	Cluh	0.679287	0.434653	0.5199	0.481675	0.426722	0.537906	0.441696	1.08274	-0.37927	0.114902	-0.105795	-0.425941	0.219169	-0.337996
11	Pafah1b1	71	63	66	236	49	106	31	85	229	359			134	180	11	Pafah1b1	0.529412	0.220395	0.318471	0.271186	0.389831		0.427215	0.169925	-1.82265	-1.09761	-1.42626	-0.646363		-0.42303
11	Mettl16	394	613			580	1087	544	580	1125	996	374	339	1039	1032	11	Mettl16	0.391477		0.348113	0.484014	0.530382	0.524476	0.501688	-0.636386		-0.905068	-0.0922819	0.175541	0.141356	0.00974327
11	Mnt					103	299	72	249	137	97	18	40	38	235	11	Mnt			0.257426	0.226006	0.584746	0.316667	0.141818			-1.52838	-1.77596	0.493815	-1.10962	-2.59724
11	Sgsm2			19	82	31	90	26	37	185	93			1	154	11	Sgsm2		0.194175	0.260163	0.415385	0.664286		0.0127389		-2.05311	-1.50779	-0.49304	0.98457		-6.27612
11	Tsr1	921	628	315	898	1392	1136	623	597	610	996	317	302	948	846	11	Tsr1	0.594455	0.260082	0.550593	0.510638	0.379975	0.512077	0.528396	0.551707	-1.5084	0.292963	0.0614005	-0.706421	0.069709	0.164046
11	Srr	1537	1343	538	2093	2121	2411	948	1032	1198	2088	552	582	1571	1614	11	Srr	0.533657	0.204709	0.468019	0.478809	0.364659	0.486796	0.493254	0.194522	-1.9579	-0.184805	-0.12236	-0.800981	-0.0762164	-0.0389329
11	Smg6	313	321	76	342	196	493	339	466	288	1068	144	134	150	182	11	Smg6	0.493711	0.183333	0.285094	0.421314	0.212813	0.517857	0.452096	-0.0362961	-2.15528	-1.32632	-0.457888	-1.88712	0.103093	-0.277295
11	Hic1	112	181													11	Hic1	0.383051							-0.687616
11	Dph1	399	658	624	1153	677	1012	415	687	696	980	338	297	705	682	11	Dph1	0.377715	0.351321	0.400946	0.376812	0.415375	0.532182	0.508279	-0.720278	-0.884715	-0.579277	-0.725825	-0.493094	0.185973	0.0477826
11	Rtn4rl1					21	87	17	82	28	95					11	Rtn4rl1			0.2	0.178218	0.232					-2	-2.20511	-1.72698
11	Rpa1	1381	1662	1104	2246	1524	1757	1264	1555	2089	2667	875	1203	1897	1589	11	Rpa1	0.453859	0.329654	0.464514	0.448423	0.43926	0.421154	0.544151	-0.267031	-1.02395	-0.205126	-0.298705	-0.352256	-0.458833	0.255453
11	Smyd4	127	258	584	808	114	292	365	323	497	285	116	168	318	296	11	Smyd4	0.330749	0.419656	0.281863	0.530435	0.635204	0.409091	0.517857	-1.01681	-0.467703	-1.34927	0.17585	0.800131	-0.530515	0.103093
11	Serpinf1	11870	10380	0	831	199	86	191	128	619	1101	43	37	100	49	11	Serpinf1	0.53348	0.00120048	0.696864	0.598131	0.360046	0.536585	0.668874	0.193496	-9.70044	1.20091	0.573735	-0.829784	0.211504	1.01436
11	Wdr81	136	160			131	93	121	130	23	83			37	76	11	Wdr81	0.459732		0.584071	0.482213	0.222222		0.330435	-0.232885		0.489805	-0.102686	-1.80735		-1.01886
11	Prpf8	1328	1199	584	966	2377	1824	1358	1366	2145	2544	319	510	902	992	11	Prpf8	0.525504	0.376933	0.565786	0.498533	0.457472	0.385078	0.476266	0.147307	-0.725079	0.381852	-0.00846779	-0.246016	-0.675251	-0.137068
11	Scarf1					0	192									11	Scarf1			0.00515464							-7.59246
11	Slc43a2					39	130	49	66					7	74	11	Slc43a2			0.233918	0.42735			0.0963855			-1.71149	-0.422233			-3.22882
11	4931413K12Rik									217	228					11	4931413K12Rik					0.487696							-0.0710195
11	Inpp5k	147	110	134	0	392	608	285	265	612	371	136	102	89	97	11	Inpp5k	0.571429	0.992647	0.392216	0.518116	0.622335	0.570833	0.478723	0.415037	7.07682	-0.631913	0.104589	0.720584	0.411532	-0.122857
11	Myo1c	4011	4016	1302	896	694	894	448	402	727	440	93	88	599	315	11	Myo1c	0.499689	0.592273	0.437107	0.526995	0.622754	0.513661	0.655022	-0.00179686	0.538657	-0.364875	0.155936	0.72316	0.0788554	0.925038
11	Crk	313	318	63	121	170	144	127	140	344	276	86	64	93	99	11	Crk	0.496051	0.344086	0.541139	0.475836	0.554662	0.572368	0.484536	-0.0227919	-0.930737	0.237943	-0.139551	0.31671	0.420576	-0.0892673
11	Ywhae	5327	4805	5168	5040	6344	5464	5178	4652	8150	7935	2229	2060	5036	4041	11	Ywhae	0.525755	0.506268	0.537257	0.526749	0.506682	0.519692	0.554797	0.148757	0.0361752	0.215399	0.154512	0.038565	0.113699	0.317495
11	1700016K19Rik			0	195	33	20	47	83			52	16			11	1700016K19Rik		0.00507614	0.618182	0.363636		0.757143			-7.61471	0.695145	-0.807355		1.64046
11	Rflnb	56	566	79	189	121	559	43	199	95	394					11	Rflnb	0.0913462	0.296296	0.178886	0.180328	0.195519			-3.31431	-1.24793	-2.19855	-2.18442	-2.04075
11	Vps53	101	145	295	574	135	299	62	99	37	254			119	22	11	Vps53	0.41129	0.339839	0.311927	0.386503	0.129693		0.839161	-0.517399	-0.957965	-1.14136	-0.666576	-2.74643		2.38333
11	Glod4	15	185	19	395	35	51	62	209	27	191			22	22	11	Glod4	0.0792079	0.0480769	0.409091	0.230769	0.127273		0.5	-3.53916	-4.30743	-0.530515	-1.73697	-2.77761		0
11	Fam57a	79	230	143	255	232	28	54	110	128	32			9	77	11	Fam57a	0.257235	0.36	0.889313	0.331325	0.796296		0.113636	-1.52982	-0.830075	3.00621	-1.01306	1.96683		-2.96347
11	Mrm3	95	469	230	354	272	734	129	297	45	430	23	39	198	202	11	Mrm3	0.169611	0.394198	0.270833	0.303738	0.0964361	0.375	0.495025	-2.29155	-0.619926	-1.42884	-1.1968	-3.22798	-0.736966	-0.0287113
11	Nxn	179	586	822	2048	346	537	160	370	321	436			119	435	11	Nxn	0.234681	0.28656	0.39209	0.302632	0.424242		0.215827	-1.70536	-1.31596	-0.632671	-1.20436	-0.440573		-1.86129
11	Timm22	1565	1819	0	1082	1167	982	689	960	1001	1293	385	378	1011	1020	11	Timm22	0.462493	0.000922509	0.543003	0.417929	0.436411	0.504575	0.497787	-0.216854	-10.0808	0.248777	-0.47794	-0.368955	0.026403	-0.0127736
11	Abr	151	258	110	690	107	102	236	211	383	750			56	119	11	Abr	0.36983	0.138404	0.511848	0.52784	0.338326		0.322034	-0.768881	-2.63813	0.068387	0.160823	-0.967707		-1.074
11	Gosr1	1095	1070	1361	1066	736	729	308	710	900	770	334	344	582	887	11	Gosr1	0.505768	0.560725	0.502386	0.302941	0.538876	0.492647	0.396329	0.0332893	0.352167	0.0137682	-1.20224	0.224796	-0.0424353	-0.607064
11	Cpd	97	108	0	535	6	37	12	98	69	366					11	Cpd	0.47343	0.0018622	0.155556	0.116071	0.160183			-0.153474	-9.06609	-2.44057	-2.92892	-2.39035
11	Blmh	518	871	846	787	1494	1045	702	899	1044	1434	338	293	447	620	11	Blmh	0.373113	0.518043	0.588351	0.438553	0.421371	0.535545	0.419083	-0.748594	0.104166	0.515263	-0.3564	-0.457548	0.205469	-0.471095
11	Nsrp1	878	1003	1380	1155	1050	1437	992	894	1441	1882	595	591	1097	587	11	Nsrp1	0.466808	0.544344	0.422258	0.525953	0.433684	0.501684	0.651246	-0.191824	0.256572	-0.452301	0.149906	-0.384962	0.00971515	0.90099
11	Efcab5	14	525	0	307	9	402	0	367	2	578	0	75	0	345	11	Efcab5	0.0277264	0.00323625	0.0242131	0.00271003	0.00515464	0.012987	0.00288184	-5.13203	-8.26679	-5.33271	-8.52356	-7.59246	-6.24793	-8.43463
11	Ssh2	13	43	63	204	57	436	6	65	59	97			38	124	11	Ssh2	0.241379	0.237918	0.117172	0.0958904	0.379747		0.237805	-1.65208	-1.67948	-2.91351	-3.23704	-0.707819		-1.68038
11	Coro6	0	86													11	Coro6	0.0113636							-6.44294
11	Ankrd13b	70	27			68	139	24	107	27	17					11	Ankrd13b	0.717172		0.330144	0.18797	0.608696			1.34239		-1.02076	-2.11103	0.63743
11	Git1	120	128	0	332	162	104	123	181	463	359	19	34	71	20	11	Git1	0.484	0.00299401	0.608209	0.405229	0.563107	0.363636	0.774194	-0.092364	-8.37938	0.634483	-0.553598	0.366128	-0.807355	1.77761
11	Abhd15					0	63			0	125			9	54	11	Abhd15			0.0153846		0.00787402		0.153846			-6		-6.97728		-2.45943
11	Taok1	233	242	384	745	262	553	133	183	447	387	95	94	253	326	11	Taok1	0.490566	0.340407	0.321909	0.421384	0.535885	0.502618	0.437177	-0.0544478	-0.954317	-1.07482	-0.457473	0.207442	0.0151069	-0.364462
11	Nufip2	818	270	316	236	624	163	604	304	907	382	177	104	959	181	11	Nufip2	0.751376	0.572202	0.792142	0.664835	0.703331	0.628975	0.84063	1.59557	0.419596	1.93016	0.988126	1.24535	0.761488	2.3991
11	Myo18a	57	64	35	289	206	305	195	239	213	350			28	166	11	Myo18a	0.471545	0.110429	0.403509	0.449541	0.378761		0.147959	-0.164387	-3.00998	-0.563901	-0.292181	-0.71386		-2.52572
11	Pipox					188	135	154	162	213	251			42	65	11	Pipox			0.581538	0.487421	0.459227		0.394495			0.47478	-0.0726037	-0.235813		-0.618129
11	Phf12	20	36			25	65	46	19	168	223			22	141	11	Phf12	0.362069		0.282609	0.701493	0.430025		0.139394	-0.817136		-1.34395	1.23266	-0.406475		-2.62619
11	Dhrs13	347	230	110	0	410	355	192	53	149	24	49	24	125	177	11	Dhrs13	0.601036	0.991071	0.535854	0.781377	0.857143	0.666667	0.414474	0.591194	6.79442	0.207261	1.83757	2.58496	1	-0.498454
11	Flot2	1275	1501	348	431	311	365	232	318	768	626			452	208	11	Flot2	0.459323	0.446863	0.460177	0.422101	0.55086		0.68429	-0.235256	-0.307804	-0.230298	-0.453226	0.294518		1.11601
11	Eral1	452	445	1099	453	866	749	568	280	1023	1179	198	372	259	627	11	Eral1	0.503893	0.707851	0.536178	0.669412	0.46461	0.347902	0.292793	0.0224673	1.27674	0.209141	1.01786	-0.204571	-0.906407	-1.27225
11	Fam222b	66	88			62	36	13	36	125	229	25	54	55	128	11	Fam222b	0.429487		0.63	0.27451	0.353933	0.320988	0.302703	-0.409644		0.767827	-1.4021	-0.86821	-1.08092	-1.20387
11	Nek8	41	54	0	384	78	101	31	74	241	501	57	47	68	36	11	Nek8	0.43299	0.00259067	0.436464	0.299065	0.325269	0.54717	0.650943	-0.389042	-8.58871	-0.368645	-1.22882	-1.05268	0.273018	0.899071
11	Rab34	708	569			57	14	73	100	297	232	29	39	48	107	11	Rab34	0.554339		0.794521	0.422857	0.561205	0.428571	0.312102	0.314824		1.95109	-0.448758	0.354982	-0.415037	-1.14018
11	Proca1					7	58	14	62	1	88					11	Proca1			0.119403	0.192308	0.021978					-2.88264	-2.07039	-5.47573
11	Supt6	375	577	338	559	632	1235	810	809	1212	1433	392	402	655	768	11	Supt6	0.39413	0.377086	0.338684	0.500308	0.458255	0.493719	0.460351	-0.620337	-0.724142	-0.965401	0.00178001	-0.241465	-0.0362505	-0.229288
11	Sdf2	1094	1325	1764	1134	1505	2062	777	869	1600	970	168	163	280	397	11	Sdf2	0.452292	0.608621	0.421967	0.472087	0.622473	0.507508	0.413844	-0.27615	0.636976	-0.454022	-0.161245	0.72143	0.0433274	-0.502198
11	2610507B11Rik	558	514	190	1439	1300	688	799	557	791	1216	231	209	854	866	11	2610507B11Rik	0.520484	0.117106	0.653769	0.589102	0.394226	0.524887	0.496516	0.118276	-2.91442	0.917045	0.519735	-0.619757	0.143735	-0.0201076
11	Spag5	254	83	1003	378	171	462	198	447	310	781	55	150	225	577	11	Spag5	0.752212	0.725958	0.270866	0.307573	0.284538	0.270531	0.281095	1.60204	1.40549	-1.4286	-1.17073	-1.33025	-1.43105	-1.35475
11	Aldoc			2089	1977	2452	2244	771	1166	511	443					11	Aldoc		0.513766	0.522137	0.398143	0.535565				0.0794605	0.127832	-0.596132	0.205584
11	Pigs	3744	4387	5077	7310	3427	4570	1355	1413	3348	2445	482	495	1367	829	11	Pigs	0.46047	0.40988	0.428554	0.489531	0.577912	0.493361	0.622384	-0.228598	-0.525808	-0.415143	-0.0604249	0.453306	-0.0383169	0.720885
11	Slc13a2									0	57					11	Slc13a2					0.0169492							-5.85798
11	Slc46a1	106	234	17	292	196	135	101	49	114	230	29	24	153	141	11	Slc46a1	0.312865	0.0578778	0.591592	0.671053	0.33237	0.545455	0.52027	-1.13505	-4.02483	0.534589	1.02857	-1.00626	0.263034	0.117039
11	Sarm1							0	42	2	87					11	Sarm1				0.0227273	0.032967						-5.42626	-4.87447
11	Poldip2	1659	1558	5239	1115	2724	1625	1496	707	1669	1500	553	615	1178	1370	11	Poldip2	0.515688	0.824418	0.626293	0.678912	0.526648	0.473504	0.462353	0.0905623	2.23123	0.744929	1.08025	0.153924	-0.153044	-0.217665
11	Tnfaip1	3870	2465	1611	1637	1594	1831	722	711	931	1183	179	193	622	335	11	Tnfaip1	0.610857	0.496	0.465422	0.503833	0.440454	0.481283	0.649635	0.650534	-0.0230836	-0.199863	0.0221184	-0.345267	-0.10806	0.890771
11	Ift20	67	174	51	19					27	211			34	46	11	Ift20	0.279835	0.722222			0.116667		0.426829	-1.36375	1.37851			-2.92057		-0.425306
11	Tmem97	918	1048	785	941	674	773	666	758	680	1052	207	288	480	648	11	Tmem97	0.466972	0.454861	0.465839	0.467742	0.392734	0.418511	0.425664	-0.190878	-0.261198	-0.197446	-0.186413	-0.628779	-0.474486	-0.432182
11	Nlk	77	77	97	238	176	255	77	227	177	508			27	104	11	Nlk	0.5	0.290801	0.408776	0.254902	0.259098		0.210526	0	-1.28616	-0.532394	-1.54749	-1.51579		-1.90689
11	Lyrm9	57	306	564	546	159	443	232	151	191	381	103	292	355	439	11	Lyrm9	0.158904	0.508094	0.264901	0.605195	0.334495	0.261965	0.447236	-2.40411	0.04671	-1.47249	0.616259	-0.992466	-1.49432	-0.305626
11	Nos2					0	174	22	25							11	Nos2			0.00568182	0.469388						-7.45121	-0.176878
11	Lgals9	725	142	1387	1720	1146	964	664	794	860	523			185	81	11	Lgals9	0.835443	0.446446	0.543087	0.455479	0.621661		0.69403	2.34395	-0.31024	0.249265	-0.257601	0.716446		1.18161
11	Ksr1	37	111					5	111	21	151	8	83	17	148	11	Ksr1	0.253333			0.0508475	0.126437	0.0967742	0.107784	-1.55943			-4.22239	-2.7885	-3.22239	-3.04924
11	Wsb1	976	977	1426	843	1575	917	452	409	1186	1083	205	95	549	303	11	Wsb1	0.499744	0.628358	0.631917	0.524913	0.522677	0.682119	0.644028	-0.0014759	0.75767	0.779701	0.143887	0.130955	1.10154	0.85536
11	Nf1					0	81	4	62	2	461			0	80	11	Nf1			0.0120482	0.0735294	0.00645161		0.0121951			-6.35755	-3.65535	-7.26679		-6.33985
11	Evi2a			556	258			128	68							11	Evi2a		0.682598		0.651515					1.10473		0.902703
11	Utp6	463	638	1888	341	1322	1298	840	755	2692	1160	866	367	1689	630	11	Utp6	0.420671	0.846706	0.504577	0.526612	0.698755	0.702024	0.728134	-0.461691	2.46555	0.0264116	0.15372	1.21385	1.23633	1.42131
11	Suz12	21	24	0	129	318	446	109	195	515	671	87	122	219	391	11	Suz12	0.468085	0.00763359	0.416449	0.359477	0.434343	0.417062	0.359477	-0.184425	-7.02237	-0.486718	-0.83335	-0.38109	-0.483083	-0.83335
11	Crlf3	294	565	1378	923	921	514	502	494	664	907	295	459	1200	648	11	Crlf3	0.342625	0.598784	0.641614	0.504008	0.422759	0.391534	0.649189	-0.940087	0.577658	0.840194	0.0231299	-0.449338	-0.636037	0.887946
11	Atad5	260	226	831	1027	473	809	422	370	825	1178	349	295	944	751	11	Atad5	0.534836	0.447312	0.369159	0.532746	0.41197	0.541796	0.556865	0.201358	-0.305185	-0.773035	0.189238	-0.51335	0.241758	0.329582
11	Adap2os					1	123	30	25							11	Adap2os			0.015873	0.54386						-5.9542	0.253757
11	Rnf135	32	8			143	96	115	240	204	296	30	34	120	401	11	Rnf135	0.785714		0.59751	0.32493	0.408367	0.469697	0.231358	1.87447		0.570012	-1.05491	-0.534839	-0.175087	-1.73219
11	Rhot1	496	266	11	153	447	225	277	484	480	518	120	161	285	292	11	Rhot1	0.650524	0.0722892	0.664688	0.364351	0.481	0.427562	0.493955	0.896406	-3.68182	0.987176	-0.8029	-0.109698	-0.420987	-0.0348855
11	Tmem98	605	584	0	272	42	338	177	138	184	347			124	56	11	Tmem98	0.508816	0.00364964	0.112565	0.561514	0.347092		0.686813	0.0508812	-8.09276	-2.97888	0.356792	-0.911562		1.13289
11	Asic2									31	108					11	Asic2					0.22695							-1.76818
11	Ccl2	1937	3623	10566	9022	206	98	832	451							11	Ccl2	0.348436	0.539408	0.676471	0.648249				-0.903014	0.227887	1.06413	0.881994
11	Ccl12			8610	6848			382	648							11	Ccl12		0.556986		0.371124					0.330287		-0.760874
11	Ccl8							4047	291							11	Ccl8				0.932719							3.79317
11	Tmem132e					119	575			0	93					11	Tmem132e			0.172414		0.0105263					-2.26303		-6.55459
11	Cct6b					0	41									11	Cct6b			0.0232558							-5.39232
11	Zfp830	321	262	440	175	315	245	221	289	619	577	199	178	504	159	11	Zfp830	0.550427	0.714749	0.562278	0.433594	0.517529	0.527704	0.759398	0.291998	1.3252	0.361266	-0.385493	0.101199	0.16004	1.65821
11	Lig3	1373	240	2075	1472	1765	684	1265	649	1830	790	635	263	929	687	11	Lig3	0.850774	0.584954	0.720522	0.660752	0.698322	0.706667	0.574784	2.51128	0.495049	1.36631	0.961766	1.21088	1.26849	0.434822
11	Rffl	401	440	1820	2158	1080	1688	571	906	868	1175	129	82	446	517	11	Rffl	0.476868	0.457538	0.390253	0.386748	0.424939	0.610329	0.463212	-0.133583	-0.245632	-0.643803	-0.665087	-0.43646	0.647328	-0.212677
11	Rad51d	69	99	233	381	268	675	285	400	233	362	89	109	227	491	11	Rad51d	0.411765	0.37987	0.284656	0.416303	0.39196	0.45	0.316667	-0.514573	-0.707064	-1.32942	-0.487587	-0.633461	-0.289507	-1.10962
11	Nle1	440	476	1616	385	1045	1248	1025	549	1429	1268	312	357	415	574	11	Nle1	0.480392	0.807289	0.455773	0.651015	0.529826	0.466468	0.419778	-0.113211	2.06665	-0.255891	0.899527	0.172323	-0.193797	-0.466978
11	Slfn8									0	168	0	80	0	85	11	Slfn8					0.00588235	0.0121951	0.0114943					-7.40088	-6.33985	-6.42626
11	AI662270					553	52	494	113	237	67	54	33			11	AI662270			0.912685	0.812808	0.777778	0.617978				3.38582	2.11839	1.80735	0.693897
11	AA465934	42	45	41	62			21	39	232	202	15	55	720	45	11	AA465934	0.483146	0.4		0.354839	0.534404	0.222222	0.940026	-0.0972972	-0.584963		-0.862496	0.19885	-1.80735	3.97029
11	Pex12	233	56			278	142	153	113	140	184	45	38	81	118	11	Pex12	0.804124		0.661137	0.574627	0.432515	0.541176	0.40796	2.03747		0.96425	0.433897	-0.39183	0.23816	-0.537266
11	Ap2b1	672	1028	676	1307	777	630	298	463	716	822	95	145	288	870	11	Ap2b1	0.395417	0.341058	0.552165	0.391874	0.465584	0.396694	0.249138	-0.612565	-0.950135	0.30213	-0.633979	-0.198919	-0.604862	-1.5916
11	Taf15					12	73	53	91	92	100			16	77	11	Taf15			0.149425	0.369863	0.479381		0.178947			-2.50901	-0.768674	-0.119053		-2.19794
11	Ccl9	69	31			21	26	163	132	105	425	29	211	93	522	11	Ccl9	0.686275		0.44898	0.552189	0.199248	0.123967	0.15235	1.12928		-0.295456	0.30227	-2.00679	-2.82103	-2.47608
11	E230016K23Rik					0	41			0	88	0	42	0	207	11	E230016K23Rik			0.0232558		0.0111111	0.0227273	0.00478469			-5.39232		-6.47573	-5.42626	-7.70044
11	Ccl6									10	37					11	Ccl6					0.22449							-1.7885
11	Ccl3			1553	3043			113	11							11	Ccl3		0.337973		0.904762					-0.969982		3.24793
11	Heatr6	313	660	298	1149	367	247	330	331	529	964	112	214	287	401	11	Heatr6	0.322051	0.206349	0.597403	0.499246	0.354515	0.344512	0.417391	-1.07389	-1.94342	0.569366	-0.00435202	-0.864537	-0.928014	-0.481127
11	Ddx52	970	1213	596	1642	1174	2042	561	1257	1975	2037	482	608	1107	1117	11	Ddx52	0.444394	0.266518	0.365134	0.308791	0.492277	0.442308	0.497754	-0.322225	-1.46053	-0.798028	-1.16249	-0.0445711	-0.334419	-0.0129623
11	Synrg	1	176	0	716	35	61	44	65	112	251	56	99	39	130	11	Synrg	0.0111732	0.00139276	0.367347	0.405405	0.309589	0.363057	0.233918	-6.46761	-9.48583	-0.784271	-0.552541	-1.1571	-0.810966	-1.71149
11	Tada2a	530	791	103	406	917	1895	474	880	1390	1937	433	395	1087	1495	11	Tada2a	0.401361	0.203523	0.326226	0.350295	0.417843	0.522892	0.421053	-0.576789	-1.96845	-1.04639	-0.891215	-0.478446	0.132195	-0.459432
11	Acaca	175	530	38	253	406	1309	303	777	688	1938	90	365	308	598	11	Acaca	0.248939	0.133106	0.237041	0.280961	0.262177	0.199125	0.340308	-1.59314	-2.70328	-1.68647	-1.3557	-1.49274	-2.00791	-0.954949
11	Aatf	960	657	675	313	1133	1210	511	578	1463	1298	458	394	1317	1134	11	Aatf	0.593576	0.682828	0.483582	0.469294	0.529859	0.537471	0.537301	0.546449	1.10626	-0.0947782	-0.17742	0.172514	0.216642	0.215658
11	Lhx1							67	56	165	104					11	Lhx1				0.544	0.612546						0.254573	0.660794
11	Mrm1	519	242	59	0	240	214	253	284	471	434	35	53	449	336	11	Mrm1	0.68152	0.983607	0.528509	0.471243	0.520397	0.4	0.571792	1.09756	5.90689	0.164696	-0.166133	0.117771	-0.584963	0.417176
11	Dhrs11	86	434	2293	3014	1624	1966	428	653	46	489	22	40	140	68	11	Dhrs11	0.166667	0.432096	0.452394	0.396122	0.0875233	0.359375	0.671429	-2.32193	-0.394293	-0.275557	-0.608313	-3.38205	-0.83399	1.03103
11	Ggnbp2	367	436	641	22	330	433	298	169	864	933	227	159	396	282	11	Ggnbp2	0.457143	0.965414	0.43268	0.637527	0.480823	0.587629	0.583824	-0.247928	4.80287	-0.390864	0.814611	-0.110722	0.510962	0.488337
11	Pigw	15	157	0	220	169	240	81	67	11	250			11	68	11	Pigw	0.091954	0.0045045	0.413625	0.546667	0.0456274		0.148148	-3.30378	-7.7879	-0.503498	0.270089	-4.38658		-2.52356
11	Myo19	393	519			515	724	117	124	311	719	106	108	29	87	11	Myo19	0.431072		0.415794	0.485597	0.302326	0.49537	0.254237	-0.400316		-0.49061	-0.0831412	-1.20645	-0.0267173	-1.55254
11	Znhit3	473	560	983	164	836	739	557	402	1404	1116	493	394	1293	975	11	Znhit3	0.457971	0.856397	0.530755	0.580645	0.557098	0.555681	0.570044	-0.243114	2.57619	0.177702	0.469485	0.330941	0.322658	0.406885
11	Car4					421	353	1130	942	1860	2472			161	222	11	Car4			0.543814	0.545323	0.429395		0.420779			0.253494	0.262269	-0.410184		-0.46105
11	Usp32	3	61	0	549	8	48	11	35	163	108	63	20	107	106	11	Usp32	0.0606061	0.00181488	0.155172	0.25	0.600733	0.752941	0.502326	-3.9542	-9.10329	-2.44478	-1.58496	0.589368	1.60768	0.0134205
11	Appbp2	215	317	8	144	411	450	340	300	470	700	130	108	426	261	11	Appbp2	0.404494	0.0584416	0.477404	0.531153	0.401877	0.545833	0.619739	-0.557995	-4.00998	-0.130483	0.180008	-0.573687	0.265239	0.704669
11	Appbp2os	77	68	79	394	95	107	121	60	173	129	68	24	93	40	11	Appbp2os	0.530612	0.168421	0.470588	0.666667	0.572368	0.734043	0.696296	0.176878	-2.30378	-0.169925	1	0.420576	1.46467	1.19704
11	Ppm1d	75	119	95	229	303	173	199	172	263	455	70	58	139	141	11	Ppm1d	0.387755	0.294479	0.635983	0.536193	0.366667	0.546154	0.496454	-0.658963	-1.26053	0.804984	0.209228	-0.788496	0.267104	-0.0204641
11	Bcas3	53	172	106	257	531	777	278	540	428	650	48	68	37	349	11	Bcas3	0.237885	0.293151	0.406107	0.340244	0.397222	0.415254	0.0979381	-1.67974	-1.26976	-0.548344	-0.955363	-0.60168	-0.493815	-3.20328
11	2610027K06Rik	53	14	74	141	91	80	99	71	123	169	15	34	25	15	11	2610027K06Rik	0.782609	0.345622	0.531792	0.581395	0.421769	0.313725	0.619048	1.848	-0.920928	0.183712	0.473931	-0.455195	-1.12928	0.70044
11	Tbx4	89	109													11	Tbx4	0.45							-0.289507
11	Brip1	12	95	0	58	199	207	110	219	271	196	113	52	170	243	11	Brip1	0.119266	0.0166667	0.490196	0.335347	0.579957	0.682635	0.412048	-2.88452	-5.88264	-0.0565835	-0.986944	0.465411	1.10497	-0.512885
11	Brip1os	1071	881	768	869	218	366	490	242	482	312	71	54	199	110	11	Brip1os	0.548618	0.469189	0.37372	0.668937	0.606784	0.566929	0.643087	0.281454	-0.178032	-0.744849	1.01477	0.625861	0.388565	0.84944
11	Ints2	277	314			555	349	435	430	661	733	154	160	467	396	11	Ints2	0.468803		0.613687	0.502884	0.474212	0.490506	0.54104	-0.180267		0.66773	0.0166403	-0.148949	-0.0547925	0.23737
11	Med13	25	56	45	1	175	126	50	100	455	251			48	78	11	Med13	0.313253	0.958333	0.580858	0.335526	0.644068		0.382812	-1.13245	4.52356	0.470747	-0.985786	0.85561		-0.689071
11	Rnft1													0	45	11	Rnft1							0.0212766							-5.52356
11	Rps6kb1	654	545	654	622	610	517	423	377	680	783	194	120	351	549	11	Rps6kb1	0.545379	0.51252	0.541187	0.528678	0.464846	0.617089	0.390244	0.262594	0.0722627	0.23822	0.165678	-0.203199	0.688467	-0.643856
11	Ptrh2	691	657	720	754	626	537	366	352	603	397	127	137	269	355	11	Ptrh2	0.512593	0.488482	0.538197	0.509722	0.602794	0.481203	0.43131	0.0726845	-0.0664774	0.220859	0.0561119	0.60178	-0.108524	-0.398918
11	Cltc	722	853	513	1039	800	1153	692	653	892	1113	139	153	508	585	11	Cltc	0.458465	0.330759	0.409719	0.514477	0.444943	0.47619	0.46484	-0.24024	-1.01674	-0.526769	0.0835647	-0.319017	-0.137504	-0.203235
11	Dhx40	281	382	287	0	656	395	488	389	624	810	93	166	221	505	11	Dhx40	0.42406	0.99654	0.623932	0.556314	0.435237	0.360153	0.304945	-0.441649	8.16993	0.730393	0.32636	-0.375846	-0.829115	-1.18858
11	Ypel2	25	75	454	273	369	377	99	131	205	394	25	45	0	71	11	Ypel2	0.254902	0.624143	0.494652	0.431034	0.342762	0.361111	0.0136986	-1.54749	0.731691	-0.030861	-0.400538	-0.939208	-0.823122	-6.16993
11	Gdpd1	114	169	988	666	284	115	51	141	568	197			36	20	11	Gdpd1	0.403509	0.597222	0.710723	0.268041	0.741851		0.637931	-0.563901	0.568284	1.29684	-1.44931	1.52293		0.817136
11	Smg8	291	155	570	574	270	299	262	335	576	542	71	141	383	326	11	Smg8	0.651786	0.498255	0.474606	0.439065	0.515179	0.336449	0.540084	0.904422	-0.0100712	-0.14667	-0.353398	0.0876191	-0.979822	0.231816
11	Prr11	948	954	61	1861	322	272	332	318	443	1009	99	171	61	221	11	Prr11	0.498424	0.0322245	0.541946	0.510736	0.305365	0.367647	0.21831	-0.00909265	-4.90844	0.242633	0.0619658	-1.18572	-0.782409	-1.84022
11	Ska2			85	0	93	93			806	295					11	Ska2		0.988506	0.5		0.731641				6.42626	0		1.44697
11	Trim37	250	119	584	562	869	887	477	556	1208	1497	144	148	700	394	11	Trim37	0.67655	0.509582	0.494881	0.461836	0.44662	0.493197	0.639599	1.06465	0.0553017	-0.0295443	-0.220667	-0.309223	-0.0392594	0.827562
11	Ppm1e			80	0	49	16	12	60	275	301					11	Ppm1e		0.987805	0.746269	0.175676	0.477509				6.33985	1.55639	-2.2303	-0.12988
11	Rad51c			64	101	85	124	49	42	107	99	32	37	34	100	11	Rad51c		0.389222	0.407583	0.537634	0.519231	0.464789	0.257353		-0.650058	-0.53952	0.217591	0.111031	-0.203533	-1.52893
11	Mtmr4	355	270	219	35	334	464	178	101	259	300	85	64			11	Mtmr4	0.567783	0.859375	0.41875	0.637011	0.463458	0.569536		0.393584	2.61143	-0.47307	0.81139	-0.211252	0.403897
11	Rnf43	14	68			0	84			0	48			0	136	11	Rnf43	0.178571		0.0116279		0.02		0.00724638	-2.20163		-6.40939		-5.61471		-7.09803
11	Mir142hg					10	53	130	232	252	473	63	211	64	106	11	Mir142hg			0.169231	0.35989	0.348006	0.231884	0.377907			-2.29546	-0.830763	-0.90575	-1.72792	-0.719099
11	Mks1	0	74	759	644	647	448	266	348	681	412	135	83	328	337	11	Mks1	0.0131579	0.540925	0.590702	0.433442	0.622831	0.618182	0.493253	-6.22882	0.2367	0.529278	-0.386387	0.72363	0.695145	-0.0389357
11	Dynll2	141	105			50	78	19	41	147	184	65	94	95	135	11	Dynll2	0.572581		0.392308	0.322581	0.444444	0.409938	0.413793	0.421827		-0.631355	-1.07039	-0.321928	-0.525461	-0.5025
11	2010015M23Rik									0	47					11	2010015M23Rik					0.0204082							-5.58496
11	Srsf1	69	122	132	0	149	316	153	221	285	893	188	305	120	493	11	Srsf1	0.362694	0.992537	0.321199	0.409574	0.242373	0.381818	0.196748	-0.813231	7.05528	-1.07952	-0.527629	-1.64426	-0.695145	-2.0295
11	Vezf1	56	128	41	54	101	55	20	48	76	139					11	Vezf1	0.306452	0.43299	0.64557	0.3	0.354839			-1.17834	-0.389042	0.86507	-1.22239	-0.862496
11	Cuedc1	430	313			153	1	60	3	402	325	19	57			11	Cuedc1	0.578523		0.987179	0.938462	0.552812	0.25641		0.456923		6.26679	3.93074	0.305908	-1.53605
11	Mrps23	857	713	136	527	588	445	682	777	737	1106	175	210	435	577	11	Mrps23	0.545802	0.206015	0.569082	0.467488	0.4	0.45478	0.42998	0.265054	-1.94636	0.401224	-0.187885	-0.584963	-0.261668	-0.406741
11	Msi2	41	1	0	79	262	69	153	179	208	253	79	34	73	37	11	Msi2	0.954545	0.0123457	0.78979	0.461078	0.451404	0.695652	0.660714	4.39232	-6.32193	1.90964	-0.225067	-0.281326	1.19265	0.961526
11	C030037D09Rik									124	89					11	C030037D09Rik					0.581395							0.473931
11	Akap1	516	441	1032	65	1031	697	382	323	774	811	316	442	492	293	11	Akap1	0.539103	0.939945	0.596532	0.541726	0.488343	0.417105	0.626429	0.226118	3.96823	0.564144	0.241351	-0.0672834	-0.482824	0.745771
11	Scpep1os									43	12					11	Scpep1os					0.77193							1.75899
11	Scpep1	7832	7223	5835	4692	5736	4669	5105	4049	5543	5190	1309	1132	3845	2608	11	Scpep1	0.520223	0.554279	0.551264	0.557667	0.516442	0.536226	0.595817	0.116767	0.314469	0.296874	0.334272	0.0949148	0.209419	0.559862
11	Elobl			76	0			61	15	99	27	44	13	51	70	11	Elobl		0.987179		0.794872	0.78125	0.762712	0.422764		6.26679		1.9542	1.8365	1.6845	-0.449307
11	Coil					6	102	5	60	72	799	14	455	78	536	11	Coil			0.0636364	0.0895522	0.0836197	0.0318471	0.128247			-3.87915	-3.34577	-3.45403	-4.926	-2.765
11	Trim25	219	414	0	380	966	1597	434	675	703	1436	480	489	456	1136	11	Trim25	0.346457	0.0026178	0.376998	0.391539	0.328818	0.495366	0.2867	-0.915608	-8.57365	-0.72468	-0.636008	-1.02941	-0.0267449	-1.31497
11	Dgke	95	218			114	323	337	168	860	305	290	65	240	209	11	Dgke	0.304762		0.261959	0.666667	0.737789	0.815126	0.534368	-1.18982		-1.49436	1	1.49248	2.14048	0.198644
11	Dgkeos							47	0	94	0			96	0	11	Dgkeos				0.979592	0.989583		0.989796				5.58496	6.56986		6.59991
11	Ankfn1									0	305					11	Ankfn1					0.00325733							-8.25739
11	Pctp	142	383	256	505	195	457	157	346	302	351	28	65	92	111	11	Pctp	0.271347	0.336828	0.299694	0.312871	0.462595	0.305263	0.453659	-1.42509	-0.977369	-1.22449	-1.13501	-0.216258	-1.18641	-0.268196
11	Tmem100	120	183					49	22	0	100					11	Tmem100	0.396721			0.684932	0.00980392			-0.604699			1.12029	-6.65821
11	Mmd	2357	4554			108	284			194	294	16	40			11	Mmd	0.341096		0.27665		0.397959	0.293103		-0.949887		-1.38663		-0.597241	-1.27009
11	Hlf	0	59			38	4									11	Hlf	0.0163934		0.886364					-5.90689		2.96347
11	Stxbp4	199	196	99	0			161	133	726	1317	71	68	133	33	11	Stxbp4	0.503778	0.990099		0.547297	0.355501	0.510638	0.797619	0.0218044	6.64386		0.273761	-0.858323	0.0614005	1.97863
11	Cox11	45	11	68	0	167	97	226	111	783	151	169	89	402	168	11	Cox11	0.793103	0.985714	0.631579	0.669617	0.837607	0.653846	0.704545	1.9386	6.10852	0.777608	1.01919	2.36678	0.917538	1.25376
11	Tom1l1	414	572	1143	2697	1318	1908	738	703	1513	1039	218	323	467	1011	11	Tom1l1	0.42004	0.297762	0.408612	0.512128	0.592796	0.403315	0.316216	-0.465424	-1.2378	-0.533373	0.0699989	0.541782	-0.565063	-1.11263
11	Utp18	859	999	1931	2954	2122	2138	989	1258	2080	1773	500	675	1493	1184	11	Utp18	0.462366	0.395335	0.498123	0.440196	0.539818	0.425658	0.557671	-0.217591	-0.613063	-0.0108321	-0.346778	0.230271	-0.432213	0.334293
11	Mbtd1	19	93	0	167	286	279	101	183	565	394	90	104	162	216	11	Mbtd1	0.175439	0.00591716	0.506173	0.356643	0.58897	0.464286	0.428947	-2.23266	-7.39232	0.0356239	-0.851137	0.518949	-0.206451	-0.412823
11	Nme2	4393	5061	2692	3370	2002	2259	1944	2135	2540	2674	671	823	2226	1948	11	Nme2	0.464679	0.444096	0.469857	0.476599	0.487155	0.449198	0.533285	-0.204173	-0.323962	-0.17416	-0.135141	-0.0741425	-0.294183	0.192367
11	Nme1	14698	16729	4810	12048	8326	10435	5252	6754	10225	12169	3818	3918	9718	11713	11	Nme1	0.467689	0.28535	0.443799	0.437458	0.456599	0.493538	0.45346	-0.186719	-1.3245	-0.3257	-0.362814	-0.251087	-0.0372907	-0.269354
11	Spag9	183	233	163	476	238	465	103	223	237	426			20	96	11	Spag9	0.440191	0.25585	0.339007	0.317073	0.357895		0.177966	-0.346803	-1.54029	-0.963319	-1.10692	-0.843274		-2.2076
11	B230206L02Rik							10	60							11	B230206L02Rik				0.152778							-2.47131
11	Tob1	170	236	937	794	888	726	385	327	238	235	35	19	77	62	11	Tob1	0.419118	0.541258	0.550124	0.540616	0.503158	0.642857	0.553191	-0.470891	0.238633	0.290228	0.234905	0.0182238	0.847997	0.308122
11	Luc7l3			0	939	0	64	41	60	117	257	31	20	27	194	11	Luc7l3		0.0010627	0.0151515	0.407767	0.31383	0.603774	0.125561		-9.87652	-6.02237	-0.53842	-1.12858	0.607683	-2.79998
11	Ankrd40	90	58					58	70	64	110	35	28	123	63	11	Ankrd40	0.606667			0.453846	0.369318	0.553846	0.659574	0.625152			-0.267104	-0.772048	0.311944	0.954196
11	Abcc3	22	83			0	107	0	43	0	64	0	42	21	39	11	Abcc3	0.214953		0.00917431	0.0222222	0.0151515	0.0227273	0.354839	-1.86876		-6.75489	-5.45943	-6.02237	-5.42626	-0.862496
11	Epn3			150	139	63	137	39	114					44	11	11	Epn3		0.5189	0.316832	0.258065			0.789474		0.109122	-1.10852	-1.52356			1.90689
11	Rsad1	68	91	3	235	31	98	28	25	69	82			34	55	11	Rsad1	0.428571	0.0166667	0.244275	0.527273	0.457516		0.384615	-0.415037	-5.88264	-1.62936	0.157541	-0.245756		-0.678072
11	Lrrc59	3140	2453	504	950	856	893	607	612	1276	1114	406	403	994	681	11	Lrrc59	0.561394	0.346841	0.489435	0.497952	0.533863	0.50185	0.593321	0.356089	-0.913162	-0.0609796	-0.0118158	0.195715	0.0106735	0.544925
[truncated: 10,330 more rows]
