# Supplementary material for: Dynamic reversal of random X-Chromosome inactivation during iPSC reprogramming
Source: HighWire-hosted journal article supplement (doi:10.1101/gr.249706.119), 2019-09-12
Supplement: Supplemental_Table_S4.xlsx [file Supplemental_Table_S4.xlsx]

## Sheet: Sheet1
kinetics	Gene	Forward primer	Reverse primer	produt length
early	Acot9	GCCAAGGGCAAGAACTACAGA	AGGTGGGGTCGGAGACTTAT	156
early	Prdx4	TTGGCTCTCCTTTTGACGCA	CAGGCAGCCAGCTAAAACG	152
early	Usp9x	GTGGGGCCATGGTTCACAA	AGGGACTGACTGTCGGGAAT	126
very late	Slc25a14	CTCTGGCTGGTAAATGCAGC	GAGAGAGAGCTAAGGCGTGG	110
very late	Gdi1	ACACAGCAGGGCTTCCATAC	AGGTGCTGAGTCCTCCGAAA	115
early	Mbtps2	CATTCTGTCTCCCATCGTGCT	GTTGATTTTCCCACCAGGAGC	128
early	Sat1	GGACATGAGGCTAGAAAGGCA	GAGAGATCGCGACCAGTAAGG	153
inter	Mecp2	AGAACTCCACCAATCCGCAG	TCATTGGTTGTGGAGCCCAG	126
inter	Atrx	ACAGGCTCCCAAAGAAGGTG	ATGCCGACGCCATTTTGTTG	144
inter	Naa10	CTAAGTGCCACGCTCATTGG	CAGGGAAAGGACGATAGGAGC	146
inter	Hcfc1	CCAAGCGACTGAACGGAGTT	ACTCTGGGAGTCGCCATCTT	138
inter	Gnl3l	GCTGCTGAAAACAGCGAACT	TGAGGGTAGGGGGCAATAGT	132
late	Ccdc22	GTAATTCACACCCCGCCTCC	GCGAGGACAGAGAGTCACG	103
late	Rbmx	AGACACAGGAAAGAGGCGGA	CGGGAACGAGGCTGAAGAAC	139
late	Pgk1	TTCTTTGGTGGCCCCTTCG	GCTGTCCATCTGCACGAGAC	135
late	Siah1b	TTGCTCTCAAGCCAAGCTCT	TCGCTTAGACCACGCCTTTT	159
